# Supplementary material
Source: PubMed Central journal article supplement (PMC3572865)
Supplement: NIHMS439549-supplement-01.pdf [file NIHMS439549-supplement-01.pdf]

# Web Extra Material

## Preventing preterm births in very high human development index countries: modeling trends and potential reductions with current interventions

Hannah H. Chang, Jim Larson, Hannah Blencowe, Christopher P. Howson, Catherine Y. Spong, Sarah Cairns-Smith, Eve M. Lackritz, Shoo K. Lee, Elizabeth Mason, Andrew C. Serazin, Salimah Walani, Joe Leigh Simpson, Joy E. Lawn

### Table of Contents

|                                                                                                                                                                   |    |
|-------------------------------------------------------------------------------------------------------------------------------------------------------------------|----|
| Webtable 1. List of countries included in various definitions of "high-income" countries with >10,000 live births in 2010.....                                    | 1  |
| Webtable 2. List of VHHDI countries with >10,000 livebirths and their source of high-quality preterm birth data for 2000-2010 .....                               | 3  |
| Webtable 3. Estimated 2010 preterm birth rates for 39 VHHDI countries with >10,000 live births in 2010 .....                                                      | 4  |
| Webtable 4. Preterm birth time trends for 28 countries with high-quality preterm birth rates for 2000-2010.....                                                   | 6  |
| Webtable 5. Top 10 performing VHHDI countries in reduction of preterm birth rate for 1990-2010, 2000-2010, and 2005-2010 .....                                    | 7  |
| Webtable 6. Detailed data and methodology used in analysis of drivers for preterm birth in US (maternal age) .....                                                | 8  |
| Webtable 7. Detailed data and methodology used in analysis of drivers for preterm birth in US (maternal race) .....                                               | 9  |
| Webtable 8. Detailed data and methodology used in analysis of drivers for preterm birth in US (assisted reproductive technology) .....                            | 10 |
| Webtable 9. Detailed data and methodology used in analysis of drivers for preterm birth in US (non-ART multiple gestations) .....                                 | 11 |
| Webtable 10. Detailed data and methodology used in analysis of drivers for preterm birth in US (caesarean delivery & labor induction) .....                       | 12 |
| Webtable 11. Detailed data and methodology used in analysis of drivers for preterm birth in US (stillbirth) .....                                                 | 13 |
| Webtable 12. Detailed data and methodology used in analysis of drivers for preterm birth in US (maternal education) .....                                         | 14 |
| Webtable 13. Preventive interventions for preterm birth excluded from analysis .....                                                                              | 15 |
| Webtable 14. Summary of assumptions and data used in analysis of intervention impact .....                                                                        | 16 |
| Webtable 15. Methodology and data used in analysis of potential impact of cervical cerclage .....                                                                 | 18 |
| Webtable 16. Methodology and data used in analysis of potential impact of progesterone.....                                                                       | 20 |
| Webtable 17. Assumptions used in estimating preterm births attributable to women with prior preterm birth with or without short cervix.....                       | 22 |
| Webtable 18. Methodology for estimating preterm births attributable to women with prior preterm birth with or without short cervix .....                          | 23 |
| Webtable 19. Methodology and data used in analysis of potential impact of smoking.....                                                                            | 24 |
| Webtable 20. Methodology and data used in analysis of potential impact of non-medically indicated caesarean delivery and labor induction .....                    | 27 |
| Webtable 21. Methodology and data used in analysis of potential impact of preterm births as result of multiple births from assisted reproductive technology..     | 29 |
| Webtable 22. Projected preterm births averted and estimated total economic cost savings assuming application of selected interventions among VHHDI countries..... | 32 |
| Webtable 23. Average annual rate of change (ARC) in preterm birth rates for 12 countries with high-quality data for 1990-2010.....                                | 34 |
| Webtable 24. Projected 2015 preterm birth rates assuming various models for 26 VHHDI countries with high-quality preterm birth data for 2000-2010.....            | 35 |
| Webtable 25. Estimated preterm birth rates before and after applying the 5 selected interventions for 39 VHHDI countries.....                                     | 37 |
| Webtable 26. Estimated number of preterm births before and after applying interventions for 39 VHHDI countries.....                                               | 39 |
| Webtable 27. Estimated reduction in preterm birth for 5 selected preventive interventions for 39 VHHDI countries.....                                             | 41 |
| Webtable 28. Webtable 28. Country-specific purchasing power parity and exchange rate from 2005 used in economic cost savings analysis .....                       | 61 |

**Webtable 1. List of countries included in various definitions of "high-income" countries with >10,000 live births in 2010**

**United Nations Statistics Division developed region (n=40)**

**World Bank high income economies (n=40)**

|                        |                                           |
|------------------------|-------------------------------------------|
| Albania                | Lithuania                                 |
| Australia              | Netherlands                               |
| Austria                | New Zealand                               |
| Belarus                | Norway                                    |
| Belgium                | Poland                                    |
| Bosnia and Herzegovina | Portugal                                  |
| Bulgaria               | Republic of Moldova                       |
| Canada                 | Romania                                   |
| Croatia                | Russian Federation                        |
| Czech Republic         | Serbia                                    |
| Denmark                | Slovakia                                  |
| Estonia                | Slovenia                                  |
| Finland                | Spain                                     |
| France                 | Sweden                                    |
| Germany                | Switzerland                               |
| Greece                 | The former Yugoslav Republic of Macedonia |
| Hungary                | Ukraine                                   |
| Ireland                | United Kingdom                            |
| Italy                  | United States                             |
| Japan                  |                                           |
| Latvia                 |                                           |

|                   |                      |
|-------------------|----------------------|
| Australia         | Netherlands          |
| Austria           | New Zealand          |
| Bahrain           | Norway               |
| Belgium           | Oman                 |
| Canada            | Poland               |
| Croatia           | Portugal             |
| Cyprus            | Qatar                |
| Czech Republic    | Republic of Korea    |
| Denmark           | Saudi Arabia         |
| Estonia           | Singapore            |
| Equatorial Guinea | Slovakia             |
| Finland           | Slovenia             |
| France            | Spain                |
| Germany           | Sweden               |
| Greece            | Switzerland          |
| Hungary           | Trinidad and Tobago  |
| Ireland           | United Arab Emirates |
| Israel            | United Kingdom       |
| Italy             | United States        |
| Japan             |                      |
| Kuwait            |                      |

**Webtable 1. List of countries included in various definitions of "high-income" countries with >10,000 live births in 2010 (continued)**

**United Nations Development Programme very high human development Index countries (n=39)**

**Millennium Development Goals developed regions (n=42)**

---

|                |                      |
|----------------|----------------------|
| Argentina      | Latvia               |
| Australia      | Lithuania            |
| Austria        | Netherlands          |
| Bahrain        | New Zealand          |
| Belgium        | Norway               |
| Canada         | Poland               |
| Chile          | Portugal             |
| Croatia        | Qatar                |
| Cyprus         | Republic of Korea    |
| Czech Republic | Singapore            |
| Denmark        | Slovakia             |
| Estonia        | Slovenia             |
| Finland        | Spain                |
| France         | Sweden               |
| Germany        | Switzerland          |
| Greece         | United Arab Emirates |
| Hungary        | United Kingdom       |
| Ireland        | United States        |
| Israel         |                      |
| Italy          |                      |
| Japan          |                      |

---

|                        |                                           |
|------------------------|-------------------------------------------|
| Albania                | Japan                                     |
| Australia              | Latvia                                    |
| Austria                | Lithuania                                 |
| Belarus                | Netherlands                               |
| Belgium                | New Zealand                               |
| Bosnia and Herzegovina | Norway                                    |
| Bulgaria               | Poland                                    |
| Canada                 | Portugal                                  |
| Croatia                | Republic of Moldova                       |
| Cyprus                 | Romania                                   |
| Czech Republic         | Russian Federation                        |
| Denmark                | Serbia                                    |
| Estonia                | Slovakia                                  |
| Finland                | Slovenia                                  |
| France                 | Spain                                     |
| Germany                | Sweden                                    |
| Greece                 | Switzerland                               |
| Hungary                | The former Yugoslav Republic of Macedonia |
| Ireland                | Ukraine                                   |
| Israel                 | United Kingdom                            |
| Italy                  | United States                             |

**Webtable 2. List of VHDI countries with >10,000 livebirths and their source of high-quality preterm birth data for 2000-2010**

| Countries      | Raw reported data | Reported data smoothed by LOESS regression) |
|----------------|-------------------|---------------------------------------------|
| Argentina      | ✓                 |                                             |
| Australia      |                   | ✓                                           |
| Austria        |                   | ✓                                           |
| Bahrain        |                   |                                             |
| Belgium        |                   | ✓                                           |
| Canada         |                   | ✓                                           |
| Chile          | ✓                 |                                             |
| Croatia        |                   | ✓                                           |
| Cyprus         |                   |                                             |
| Czech Republic | ✓                 |                                             |
| Denmark        | ✓                 |                                             |
| Estonia        |                   | ✓                                           |
| Finland        |                   | ✓                                           |
| France         |                   |                                             |
| Germany        | ✓                 |                                             |
| Greece         |                   |                                             |
| Hungary        | ✓                 |                                             |
| Ireland        | ✓                 |                                             |
| Israel         |                   |                                             |
| Italy          |                   |                                             |
| Japan          | ✓                 |                                             |

**Webtable 2. List of VHDI countries with >10,000 livebirths and their source of high-quality preterm birth data for 2000-2010 (continued)**

| Countries            | Raw reported data | Reported data smoothed by LOESS regression) |
|----------------------|-------------------|---------------------------------------------|
| Latvia               | ✓                 |                                             |
| Lithuania            | ✓                 |                                             |
| Netherlands          | ✓                 |                                             |
| New Zealand          |                   | ✓                                           |
| Norway               | ✓                 |                                             |
| Poland               | ✓                 |                                             |
| Portugal             | ✓                 | ✓                                           |
| Qatar                |                   |                                             |
| Republic of Korea    |                   |                                             |
| Singapore            |                   |                                             |
| Slovakia             |                   |                                             |
| Slovenia             |                   | ✓                                           |
| Spain                | ✓                 |                                             |
| Sweden               |                   | ✓                                           |
| Switzerland          |                   |                                             |
| United Arab Emirates |                   |                                             |
| United Kingdom       |                   |                                             |
| United States        |                   | ✓                                           |

**Webtable 3. Estimated 2010 preterm birth rates for 39 VHHDI countries with >10,000 live births in 2010**

| <b>Country</b> | <b>2010 Preterm birth rate (%)</b> | <b>Country</b>       | <b>2010 Preterm birth rate (%)</b> |
|----------------|------------------------------------|----------------------|------------------------------------|
| Argentina      | 8.0                                | Latvia               | 5.3                                |
| Australia      | 7.6                                | Lithuania            | 5.7                                |
| Austria        | 10.9                               | Netherlands          | 8.0                                |
| Bahrain        | 14.0                               | New Zealand          | 7.6                                |
| Belgium        | 7.9                                | Norway               | 6.0                                |
| Canada         | 7.8                                | Poland               | 6.7                                |
| Chile          | 7.1                                | Portugal             | 7.7                                |
| Croatia        | 5.5                                | Qatar                | 10.5                               |
| Cyprus         | 14.7                               | Republic of Korea    | 9.2                                |
| Czech Republic | 7.3                                | Singapore            | 11.5                               |
| Denmark        | 6.7                                | Slovakia             | 6.3                                |
| Estonia        | 5.7                                | Slovenia             | 7.5                                |
| Finland        | 5.5                                | Spain                | 7.4                                |
| France         | 6.7                                | Sweden               | 5.9                                |
| Germany        | 9.2                                | Switzerland          | 7.4                                |
| Greece         | 6.6                                | United Arab Emirates | 7.6                                |
| Hungary        | 8.6                                | United Kingdom       | 7.8                                |
| Ireland        | 6.4                                | United States        | 12.0                               |
| Israel         | 8.0                                |                      |                                    |
| Italy          | 6.5                                |                      |                                    |
| Japan          | 5.9                                |                      |                                    |

**Webtable 4. Preterm birth time trends for 28 countries with high-quality preterm birth rates for 2000-2010**

| Country        | 2000 | 2001 | 2002 | 2003 | 2004 | 2005 | 2006 | 2007 | 2008 | 2009 | 2010 | Data type        | VHHDI country? |
|----------------|------|------|------|------|------|------|------|------|------|------|------|------------------|----------------|
| Argentina      | 6.2  | 7.1  | 7.3  | 7.6  | 8.1  | 7.9  | 8.1  | 8.0  | 8.2  | 8.2  | 8.4  | Raw data         | Yes            |
| Australia      | 7.2  |      |      |      |      | 7.6  |      |      |      |      | 7.6  | Loess regression | Yes            |
| Austria        | 10.0 |      |      |      |      | 11.1 |      |      |      |      | 10.9 | Loess regression | Yes            |
| Belarus        | 4.9  |      |      |      |      | 4.5  |      |      |      |      | 4.1  | Loess regression | No             |
| Belgium        | 7.5  |      |      |      |      | 7.9  |      |      |      |      | 7.9  | Loess regression | Yes            |
| Canada         | 7.4  |      |      |      |      | 7.8  |      |      |      |      | 7.8  | Loess regression | Yes            |
| Chile          | 6.0  |      |      | 6.5  |      |      | 7.2  | 7.1  | 7.5  |      | 7.2  | Raw data         | Yes            |
| Croatia        | 5.1  |      |      |      |      | 5.3  |      |      |      |      | 5.5  | Loess regression | Yes            |
| Czech Republic | 5.4  | 5.5  | 5.6  | 5.9  | 7.0  | 7.4  | 7.9  | 8.1  | 8.1  | 8.2  | 8.0  | Raw data         | Yes            |
| Denmark        | 6.3  | 6.9  | 6.9  | 7.1  | 7.2  | 6.8  | 6.7  | 6.9  |      |      |      | Raw data         | Yes            |
| Estonia        | 5.8  |      |      |      |      | 6.0  |      |      |      |      | 5.7  | Loess regression | Yes            |
| Finland        | 5.8  |      |      |      |      | 5.6  |      |      |      |      | 5.5  | Loess regression | Yes            |
| Germany        |      |      | 8.6  | 9.0  | 9.4  | 9.1  | 9.1  | 9.0  | 9.0  |      |      | Raw data         | Yes            |
| Hungary        | 8.1  | 7.9  | 8.0  | 8.4  | 8.6  | 8.4  | 8.4  | 8.6  | 9.0  |      | 8.7  | Raw data         | Yes            |
| Ireland        | 5.4  | 5.5  | 5.5  | 5.4  | 5.5  | 5.6  | 5.6  | 5.8  | 5.9  |      | 5.7  | Raw data         | Yes            |
| Japan          | 5.4  |      |      |      |      | 5.7  | 5.7  | 5.8  | 5.8  | 5.7  | 5.7  | Raw data         | Yes            |
| Latvia         | 5.0  | 5.5  | 5.5  | 5.3  | 5.7  | 5.6  | 5.1  | 5.6  | 4.8  | 5.4  | 5.8  | Raw data         | Yes            |
| Lithuania      | 5.3  | 5.3  | 5.6  | 5.5  | 5.3  | 5.6  | 5.7  | 5.9  | 5.9  | 5.8  | 5.4  | Raw data         | Yes            |
| Netherlands    |      | 8.4  | 7.9  | 7.9  | 7.9  | 7.9  | 7.9  | 7.6  | 7.7  |      |      | Raw data         | Yes            |
| New Zealand    | 7.4  |      |      |      |      | 7.3  |      |      |      |      | 7.6  | Loess regression | Yes            |
| Norway         | 5.1  | 6.6  | 6.0  | 6.4  | 7.7  | 5.2  | 5.2  | 5.8  | 8.7  | 5.4  | 6.2  | Raw data         | Yes            |
| Poland         |      |      |      |      | 6.8  |      | 6.5  | 6.6  | 6.6  | 6.7  | 6.6  | Raw data         | Yes            |
| Portugal       | 5.9  | 5.6  | 6.4  | 6.9  | 6.8  | 6.6  | 7.9  | 9.1  | 8.9  | 8.7  | 7.7  | Raw data         | Yes            |
| Slovenia       | 6.5  |      |      |      |      | 6.8  |      |      |      |      | 7.5  | Loess regression | Yes            |
| Spain          | 6.7  | 6.7  | 7.1  | 7.2  | 7.1  | 6.7  | 6.8  | 6.7  | 6.6  | 6.7  | 6.5  | Raw data         | Yes            |
| Sweden         | 6.2  |      |      |      |      | 6.1  |      |      |      |      | 5.9  | Loess regression | Yes            |
| United States  | 11.8 |      |      |      |      | 12.5 |      |      |      |      | 12.0 | Loess regression | Yes            |
| Uruguay        | 8.8  | 9.3  | 9    | 9.6  | 8.9  | 8.7  | 8.7  | 9.3  |      |      |      | Raw data         | No             |

Webtable 5. Top 10 performing VHDI countries in reduction of preterm birth rate for 1990-2010, 2000-2010, and 2005-2010

### Last 20 years<sup>1</sup>: 1990-2010

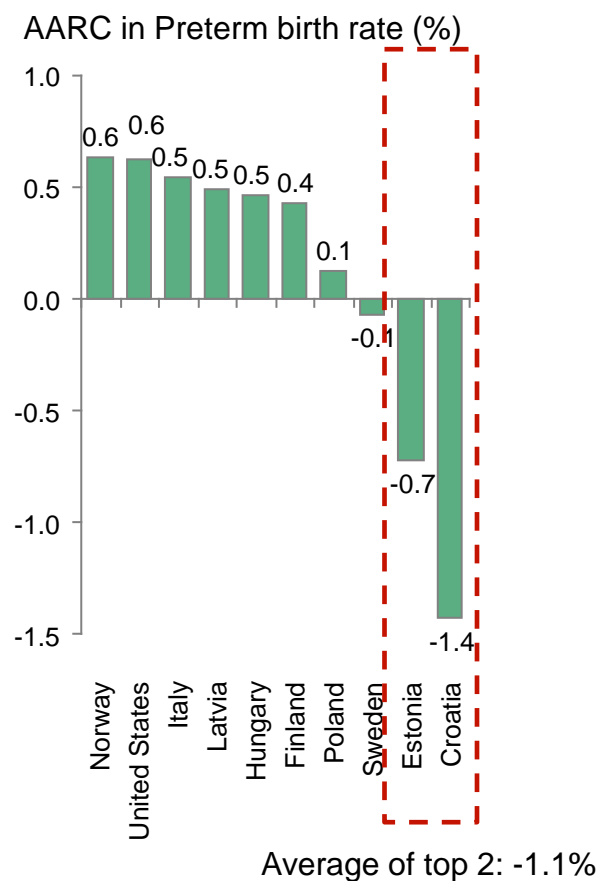

### Last 10 years<sup>2</sup> : 2000-2010

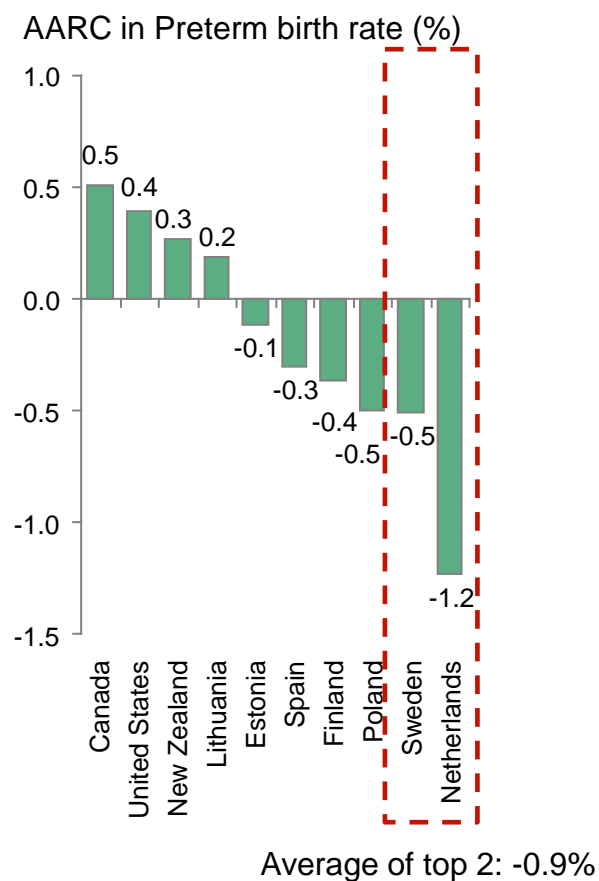

### Last 5 years<sup>2</sup> : 2005-2010

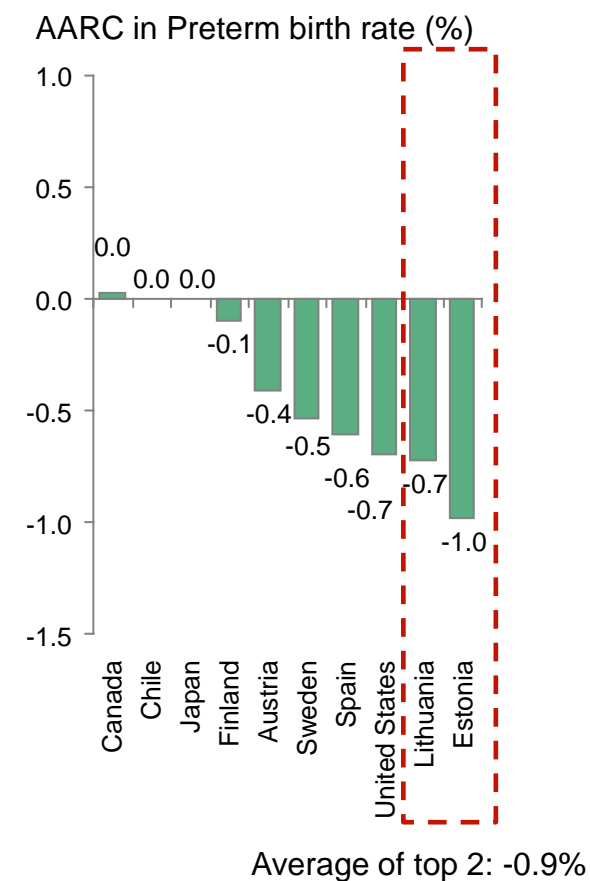

Footnote: 1. Based on subset of 11 very high human development index countries with the most complete data for 1990-2010. 2. Based on subset of 16 very high human development index countries with the most complete data for 2000-2010. AARC = average annual rate of change.



Webtable 6. Detailed data and methodology used in analysis of drivers for preterm birth in US (maternal age)

### Maternal age demographics (1989 & 2004)

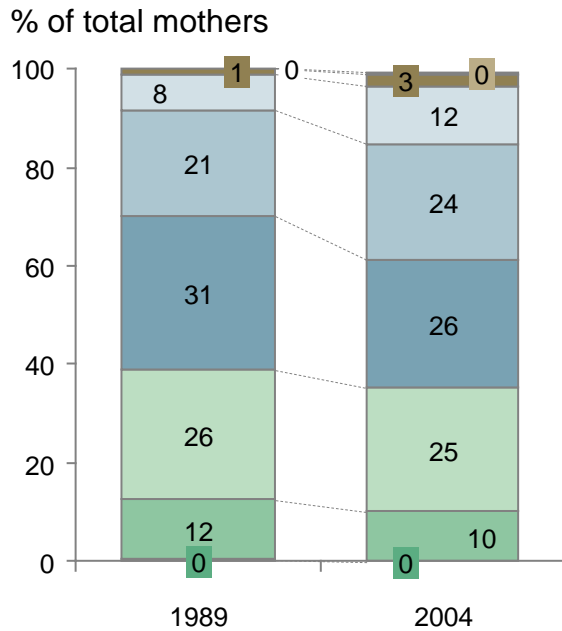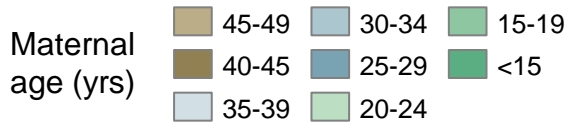

### Preterm birth odds ratio<sup>1</sup> by maternal age

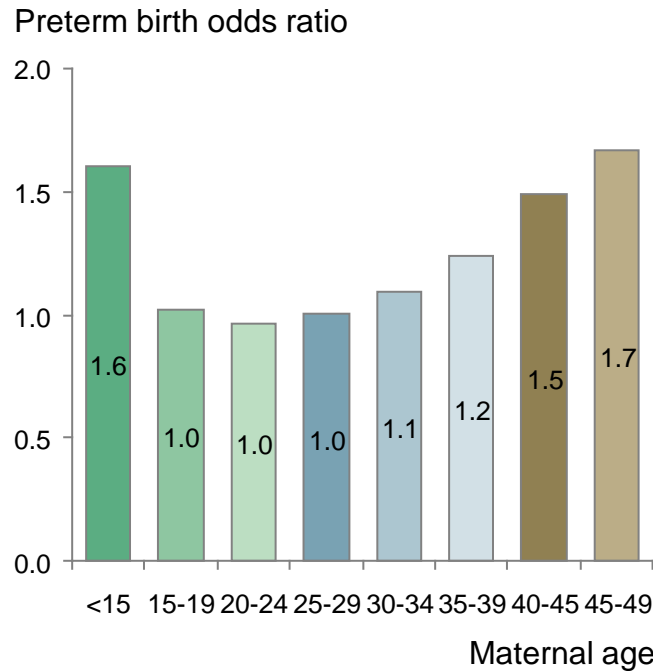

### Projected effect on Preterm birth rate

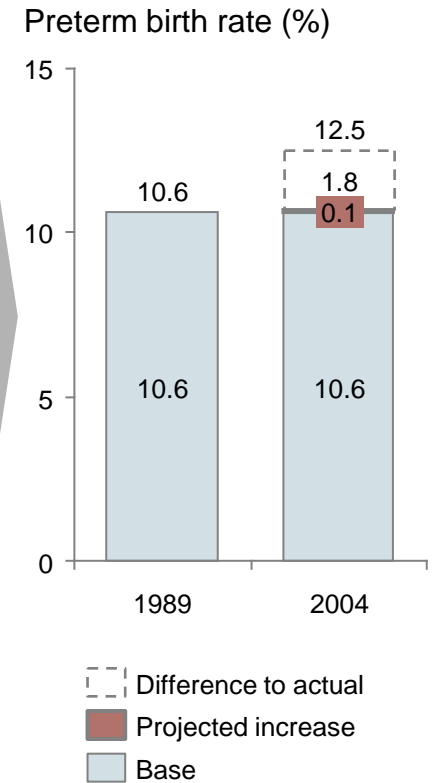

1. We were unable to identify published results for the relative risk for preterm birth among mothers of different ages, thus odds ratios were used instead. This is an approximation, but given the incidences are relatively small (particularly for the age brackets with higher odds ratios), we expect the deviation to be small. See McNutt LA, Wu C, Xue X, Hafner JP. Estimating the relative risk in cohort studies and clinical trials of common outcomes. Am J Epidemiol. 2003 May 15;157(10):940-3. Other sources: VanderWeele et al, (2012), Social Science & Medicine (2012)

Webtable 7. Detailed data and methodology used in analysis of drivers for preterm birth in US (maternal race)

### Maternal racial demographics (1989 & 2004)

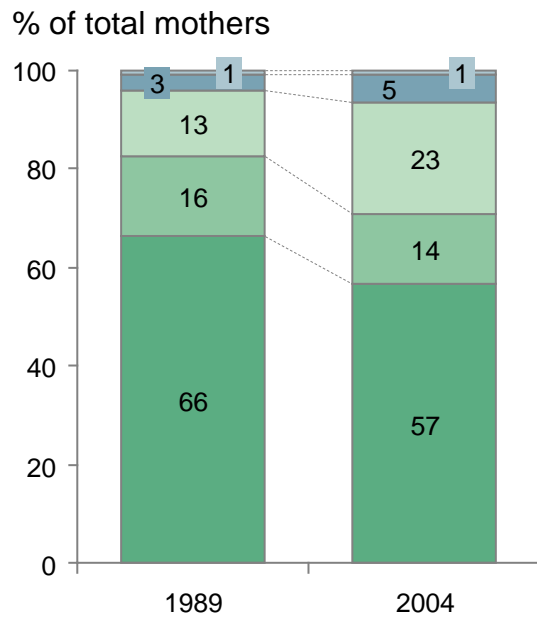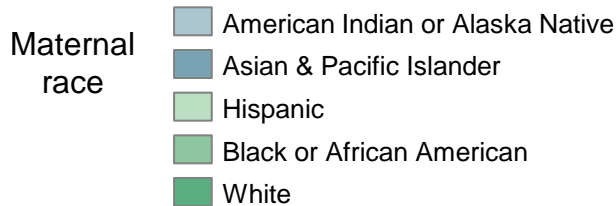

### Preterm birth odds ratio<sup>1</sup> by maternal race

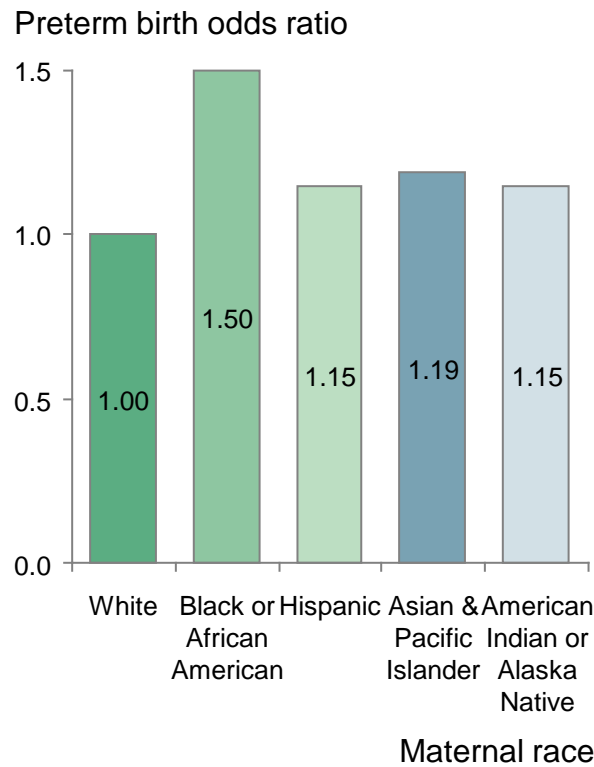

### Projected effect on Preterm birth rate

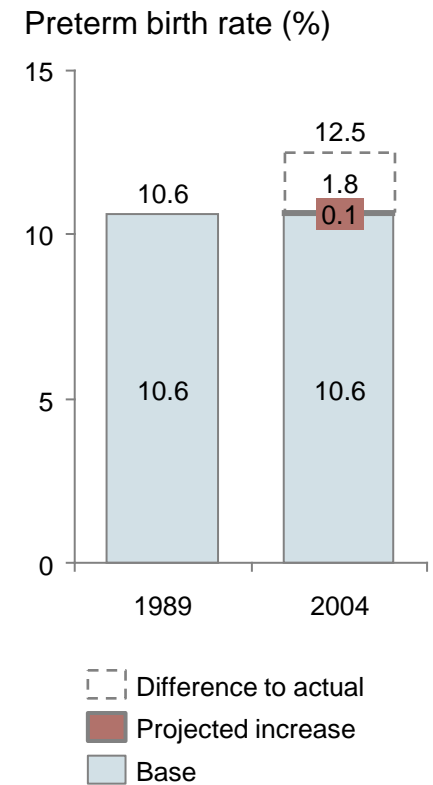

1. We were unable to identify published results for the relative risk for preterm birth among mothers of different races, thus odds ratios were used instead. This is an approximation, but given the incidences are relatively small (particularly for the races with higher odds ratios), we expect the deviation to be small. See McNutt LA, Wu C, Xue X, Hafner JP. Estimating the relative risk in cohort studies and clinical trials of common outcomes. Am J Epidemiol. 2003 May 15;157(10):940-3. Other sources: VanderWeele et al, (2012), Social Science & Medicine, US Census Brief (2010)

Webtable 8. Detailed data and methodology used in analysis of drivers for preterm birth in US (assisted reproductive technology)

### Significant increase in ART births (1989-2004)...

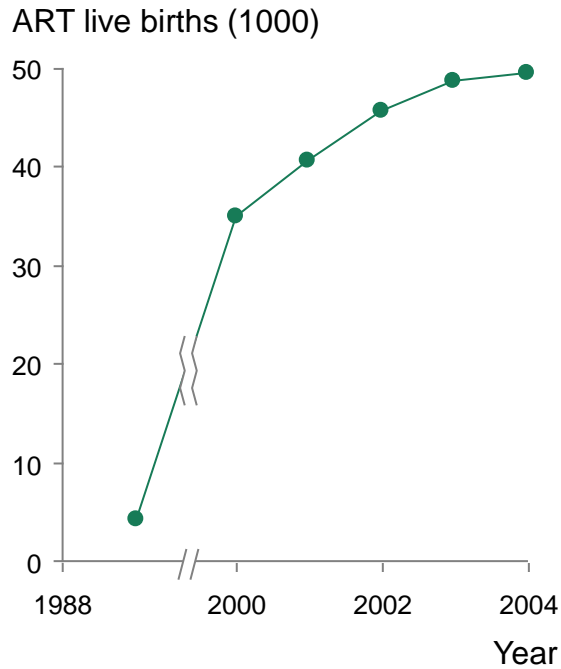

### ...drives increase in multiple births and Preterm birth rate

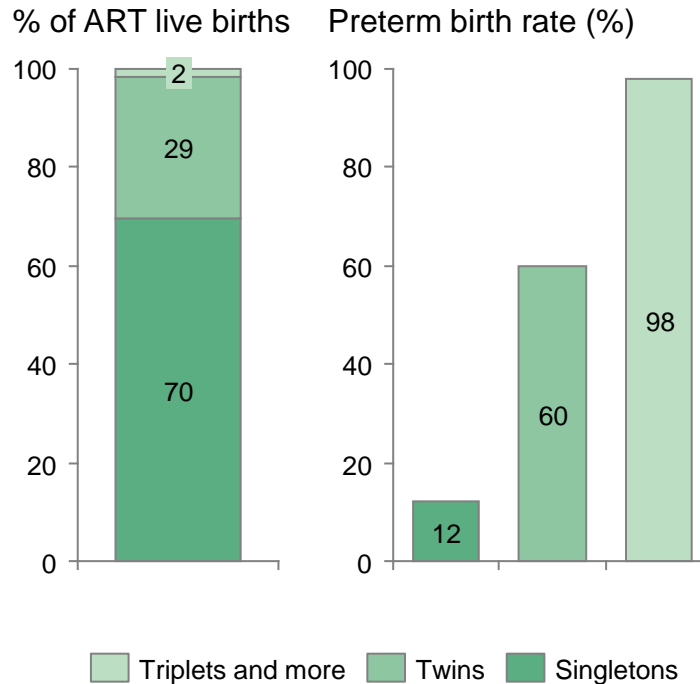

### Projected effect on Preterm birth rate

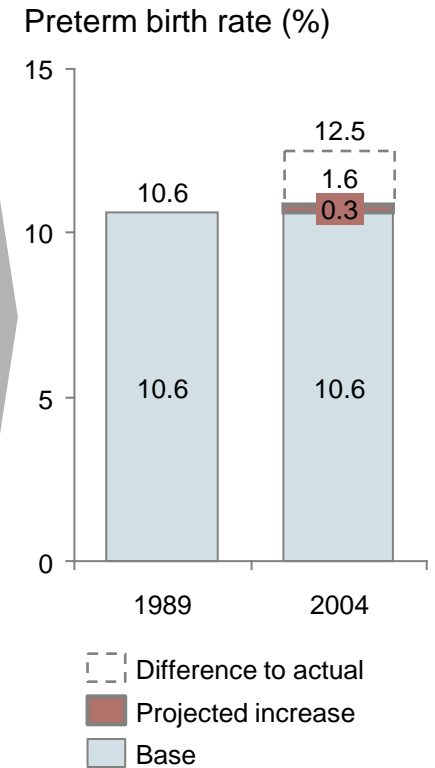

Webtable 9. Detailed data and methodology used in analysis of drivers for preterm birth in US (non-ART multiple gestations)

### Prevalence of non-ART multiple gestations (1989 & 2004)

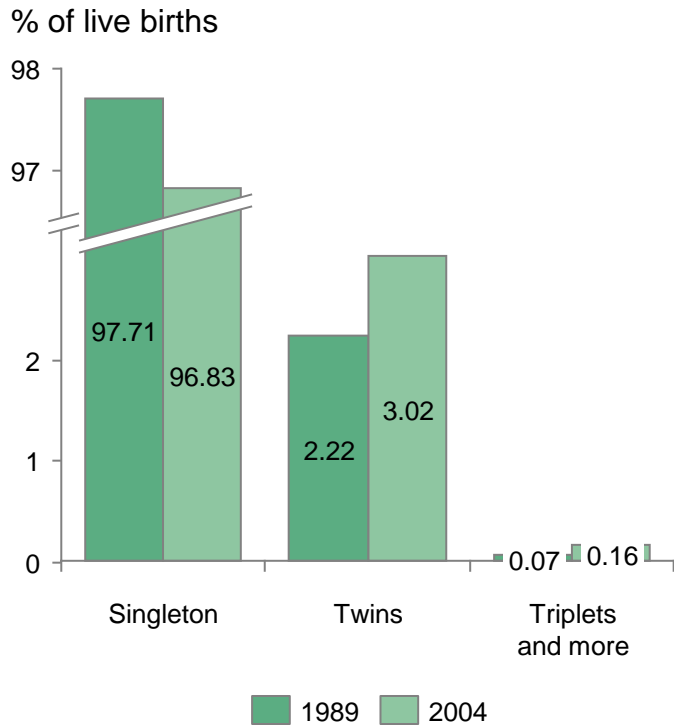

### Preterm birth rate by pregnancy plurality

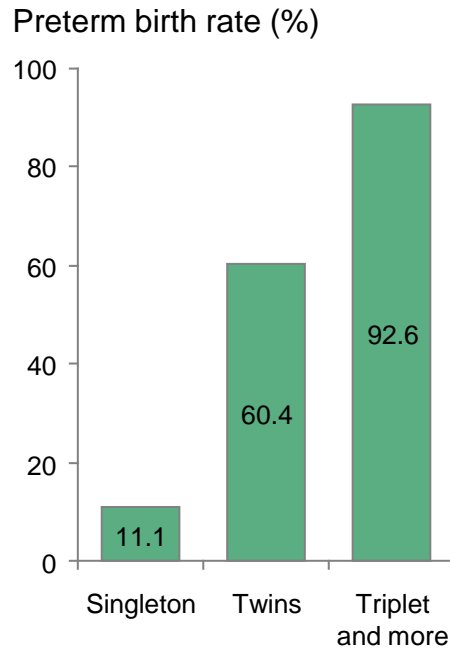

### Projected effect on Preterm birth rate

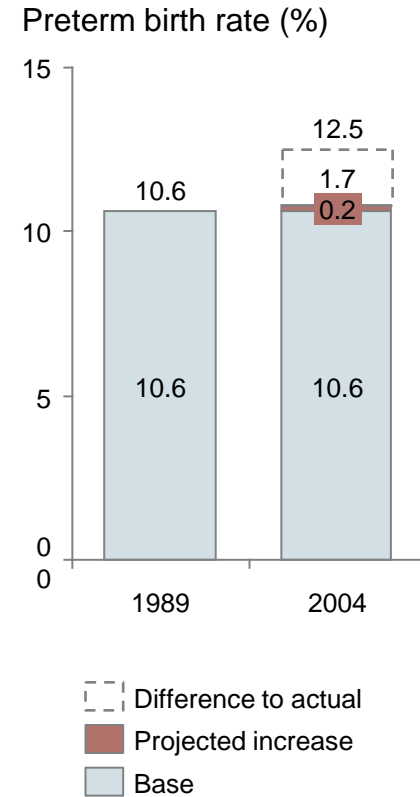

Webtable 10. Detailed data and methodology used in analysis of drivers for preterm birth in US (caesarean delivery & labor induction)

### Slight increase in share of late preterm births among all Preterm birth...

Share of preterm births (%)

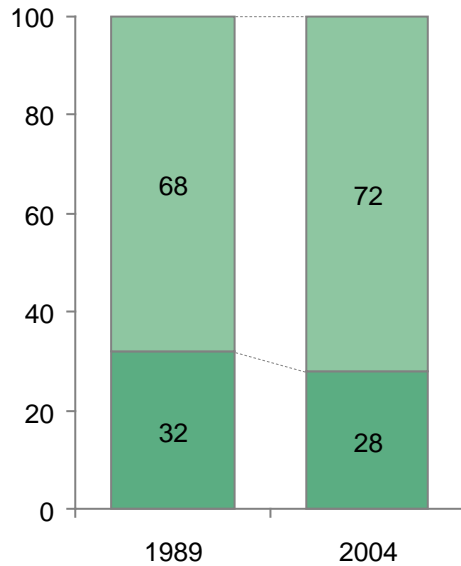

■ Late preterm birth  
■ Moderately and early preterm birth

### ...and higher non-medically indicated fraction among late preterm births

Share of late- preterm births (%)

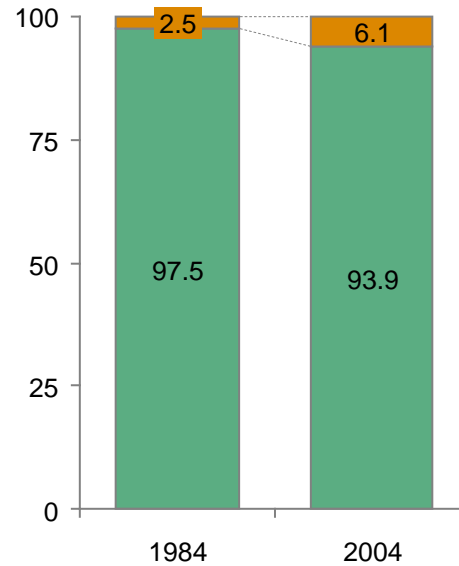

■ Non-medically indicated  
■ Medically-indicated

### Projected effect on preterm birth rate

Preterm birth rate (%)

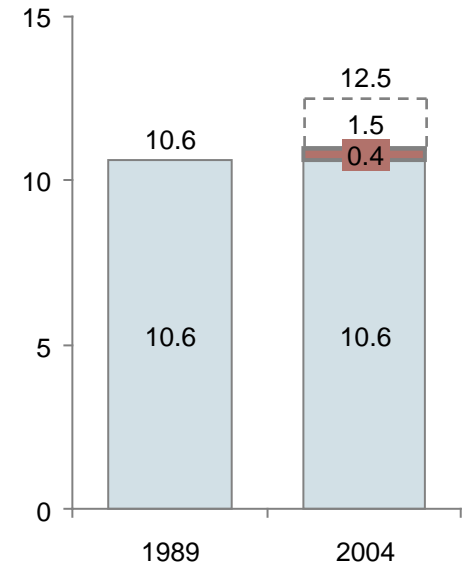

Difference to actual  
 Projected increase  
 Base

Note: Assumes that all non-late preterm births delivered through Caesarean delivery are medically-indicated. Also assumes that the rate of increase in non-medically indicated Caesarean deliveries among late preterm births is the same as the rate of increase in non-medically indicated Caesarean deliveries among all live births. Source: National Vital Statistics Report (2009): Final birth data 2006, Declercq et al, (2006), A J Public Health, VanderWeele et al (2012), Social Science & Medicine,

Webtable 11. Detailed data and methodology used in analysis of drivers for preterm birth in US (stillbirth)

### Stillbirth rates in US<sup>1</sup> (1989 - 2004)

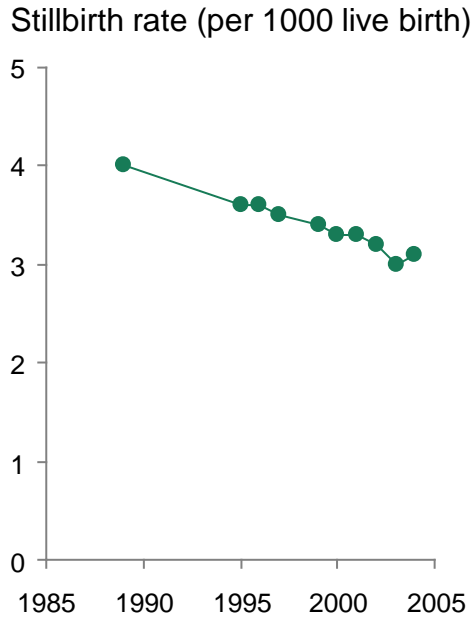

### Incidence of stillbirths in US (1989-2004)

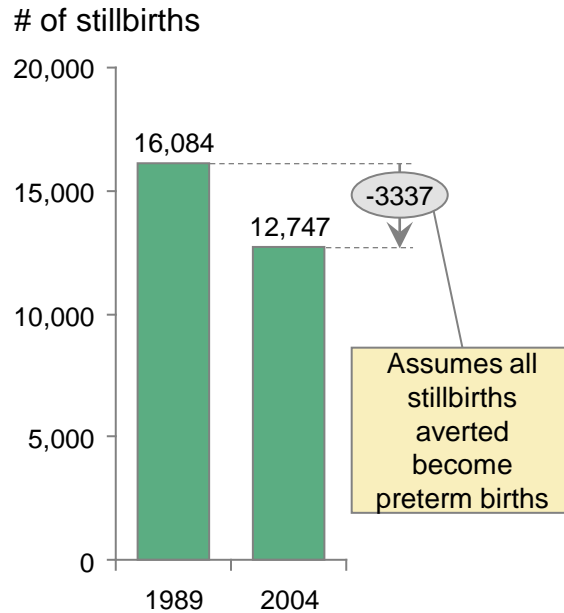

### Projected effect on preterm birth rate

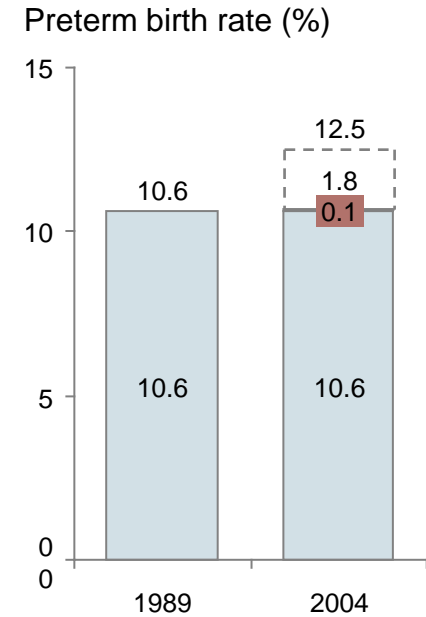

  Difference to actual  
  Projected increase  
  Base

Webtable 12. Detailed data and methodology used in analysis of drivers for preterm birth in US (maternal education)

### Maternal education demographics (1989 & 2004)

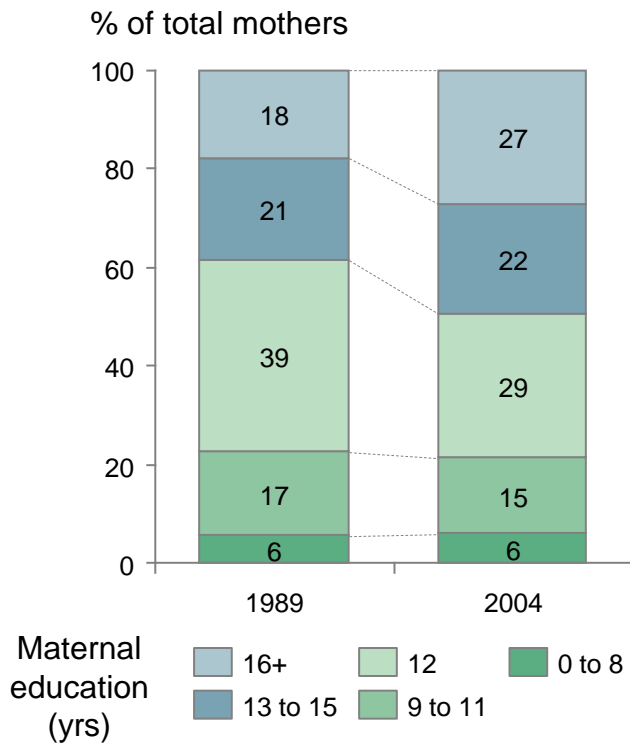

### Preterm birth odds ratio<sup>1</sup> by maternal education

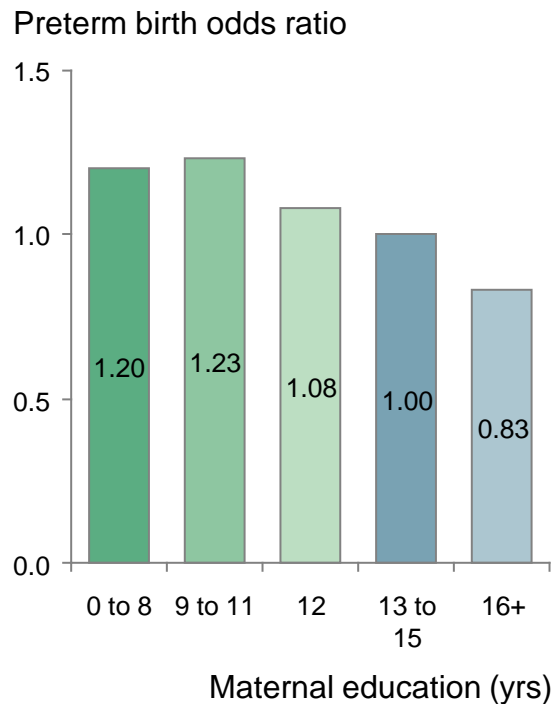

### Projected effect on preterm birth rate

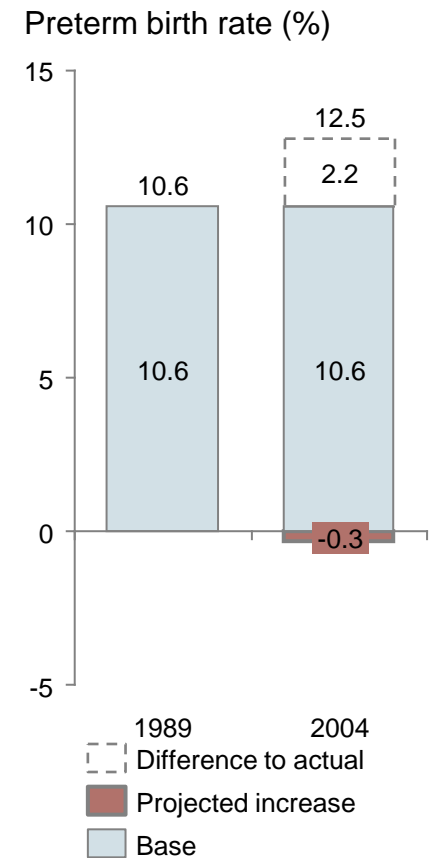

1. We were unable to identify published results for the relative risk for preterm birth among mothers with different years of education, thus odds ratios were used instead. This is an approximation, but given the incidences are relatively small (particularly for the education duration brackets with higher odds ratios), we expect the deviation to be small. See McNutt LA, Wu C, Xue X, Hafner JP. Estimating the relative risk in cohort studies and clinical trials of common outcomes. Am J Epidemiol. 2003 May 15;157(10):940-3. Other sources: VanderWeele et al, (2012), Social Science & Medicine, US Census Brief (2010)

**Webtable 13. Preventive interventions for preterm birth excluded from analysis**

| <b>Interventions</b>                                                  | <b>Evidence of efficacy for preterm birth by GRADE criteria</b> | <b>Rec. for implementation for preterm birth</b> | <b>Rationale for exclusion from analysis</b>    |
|-----------------------------------------------------------------------|-----------------------------------------------------------------|--------------------------------------------------|-------------------------------------------------|
| Birth spacing                                                         | Mod                                                             | Weak                                             | Weak GRADE recommendation by GAPPS <sup>1</sup> |
| Periconceptional folate                                               | Mod                                                             | Weak                                             | Weak GRADE recommendation by GAPPS              |
| Indoor air pollution control                                          | Very low                                                        | Weak against                                     | Weak GRADE recommendation by GAPPS              |
| Balanced protein energy supplementation                               | High no effect                                                  | Strong against                                   | Negative GRADE recommendation by GAPPS          |
| Multiple Micronutrient supplementation                                | High no effect                                                  | Strong against                                   | Negative GRADE recommendation by GAPPS          |
| Iron and folate supplementation                                       | Mod no effect                                                   | Strong against                                   | Negative GRADE recommendation by GAPPS          |
| Magnesium sulfate supplementation                                     | Mod                                                             | Weak against                                     | Weak GRADE recommendation by GAPPS              |
| Calcium supplementation                                               | Mod                                                             | Weak                                             | Weak GRADE recommendation by GAPPS              |
| Fatty acids supplementation                                           | High no effect                                                  | Strong against                                   | Negative GRADE recommendation by GAPPS          |
| Screening and treatment of syphilis                                   | Mod                                                             | Weak                                             | Weak GRADE recommendation by GAPPS              |
| Intermittent presumptive treatment during pregnancy (PTp) for malaria | Low                                                             | Weak                                             | Weak GRADE recommendation by GAPPS              |
| Insecticide-treated mosquito nets (ITNs)                              | Low                                                             | Weak                                             | Weak GRADE recommendation by GAPPS              |
| Screening and treatment of asymptomatic bacteriuria                   | Low                                                             | Weak                                             | Weak GRADE recommendation by GAPPS              |
| Screening and treatment of bacterial vaginosis                        | High no effect                                                  | Strong against                                   | Negative GRADE recommendation by GAPPS          |
| Prevention of Mother-to-Child transmission of HIV                     | Low                                                             | Limited outcomes, no recommendation              | No GRADE recommendation by GAPPS                |
| Anti-Helminthic treatment                                             | Low                                                             | Weak against                                     | Negative GRADE recommendation by GAPPS          |
| Screening and treatment of periodontal disease                        | Mod                                                             | Weak against                                     | Negative GRADE recommendation by GAPPS          |
| Multivitamins for HIV+ women                                          | Mod no effect                                                   | Weak against                                     | Negative GRADE recommendation by GAPPS          |

1. Global Alliance to Prevent Prematurity and Stillbirth. Source: Barros FC, Bhutta ZA, Batra M, Hansen TN, Victora CG, Rubens CE. Global report on preterm birth and stillbirth (3 of 7): evidence for effectiveness of interventions. *BMC pregnancy and childbirth* 2010; **10 Suppl 1**: S3.



**Webtable 14. Summary of assumptions and data used in analysis of intervention impact**

| <b>Intervention</b>      | <b>Target population</b><br><i>(# countries with data/all countries)</i>                                                             | <b>Incremental coverage</b>                                              | <b>Efficacy</b>                                                                     | <b>References</b>                                                                                                                                                    |
|--------------------------|--------------------------------------------------------------------------------------------------------------------------------------|--------------------------------------------------------------------------|-------------------------------------------------------------------------------------|----------------------------------------------------------------------------------------------------------------------------------------------------------------------|
| <b>Cerclage</b>          | % preterm births attributable to maternal population with prior Preterm birth due to short cervix <sup>1</sup><br><i>(39/39)</i>     | 99.7% of maternal population (0.3% existing coverage in US) <sup>2</sup> | 25% reduction in preterm birth with cerclage <sup>3</sup>                           | 1. See Webappendix p.24-25<br>2. Osterman MJ et al. (2011) National Vital Statistics<br>3. Owen J et al. Am J Obstet Gynecol. 2009                                   |
| <b>Progesterone</b>      | % of preterm births attributable to maternal population with prior Preterm birth without short cervix <sup>1</sup><br><i>(39/39)</i> | 67% of target population <sup>2</sup>                                    | 20% reduction in preterm birth with progesterone <sup>3</sup>                       | 1. See Webappendix p.24-25<br>2. Assumption based on literature review<br>3. Dodd et al. Cochrane Review 2012,                                                       |
| <b>Smoking cessation</b> | % of preterm births from mothers who smoke <sup>1,2</sup><br><i>(25/39)</i>                                                          | 100% of target population <sup>3</sup>                                   | 4% success rate in smoking cessation programs targeting pregnant women <sup>4</sup> | 1. See Webappendix p. 27 for complete list of references<br>2. Shah et al. Am J Obstet Gynecol 2000<br>3. Aspirational goal<br>4. Cobb et al. Nicotine Tob Res. 2005 |

Note: where there is incomplete data, European average was used.

**Webtable 14. Summary of assumptions and data used in analysis of intervention impact (continued)**

| Intervention                                                                  | Target population<br>(# countries with data/all countries)                                                                                                                                                                                                                                                                                     | Incremental coverage<br>(# countries with data/all countries)                                                                                                                                                                                 | Efficacy                    | References                                                                                                                                                                                                                                                                                  |
|-------------------------------------------------------------------------------|------------------------------------------------------------------------------------------------------------------------------------------------------------------------------------------------------------------------------------------------------------------------------------------------------------------------------------------------|-----------------------------------------------------------------------------------------------------------------------------------------------------------------------------------------------------------------------------------------------|-----------------------------|---------------------------------------------------------------------------------------------------------------------------------------------------------------------------------------------------------------------------------------------------------------------------------------------|
| <b>Decreasing non-medically indicated induction and Caesarean delivery</b>    | % of late preterm births among all preterm births <sup>1</sup> ( <i>global</i> )                                                                                                                                                                                                                                                               | % of non-medically indicated Caesarean delivery and induction among late preterm births: <ul style="list-style-type: none"> <li>Scaled to that of US<sup>2</sup> based on rate of elective C-delivery<sup>3</sup></li> </ul> ( <i>33/39</i> ) | 80% reduction <sup>4</sup>  | <ol style="list-style-type: none"> <li>Born Too Soon report</li> <li>Laughon et al, Obstet Gynecol. 2010</li> <li>Gibbons et al. World Health Report 2010</li> <li>Aspirational but based on Donovan et al, AJOG, 2012.</li> </ol>                                                          |
| <b>Decreasing multiple births from assisted reproductive technology (ART)</b> | Current preterm births from ART as function of: <ul style="list-style-type: none"> <li>Total ART live births<sup>1,2</sup> (<i>11/39</i>)</li> <li>Current rate of multiple births from ART<sup>1,3</sup> (<i>20/39</i>)</li> <li>Preterm birth rate associated with each plurality among ART births<sup>1,3,4</sup> (<i>12/39</i>)</li> </ul> | Difference between current and target preterm births from ART assuming target final plurality distribution of: <ul style="list-style-type: none"> <li>Singleton: 89.5%</li> <li>Twins: 10%</li> <li>Triplets: 0.5%</li> </ul>                 | See previous two categories | <ol style="list-style-type: none"> <li>ESHRE 2012 report Human Reproduction, Supplementary materials</li> <li>US Census Bureau Statistical Abstract 2012</li> <li>CDC ART report 2009</li> <li>Helmerhorst et al. BMJ 2004</li> <li>Aspirational goal based on expert interviews</li> </ol> |

Note: where there is incomplete data, European average or country-appropriate data was used.

Webtable 15. Methodology and data used in analysis of potential impact of cervical cerclage

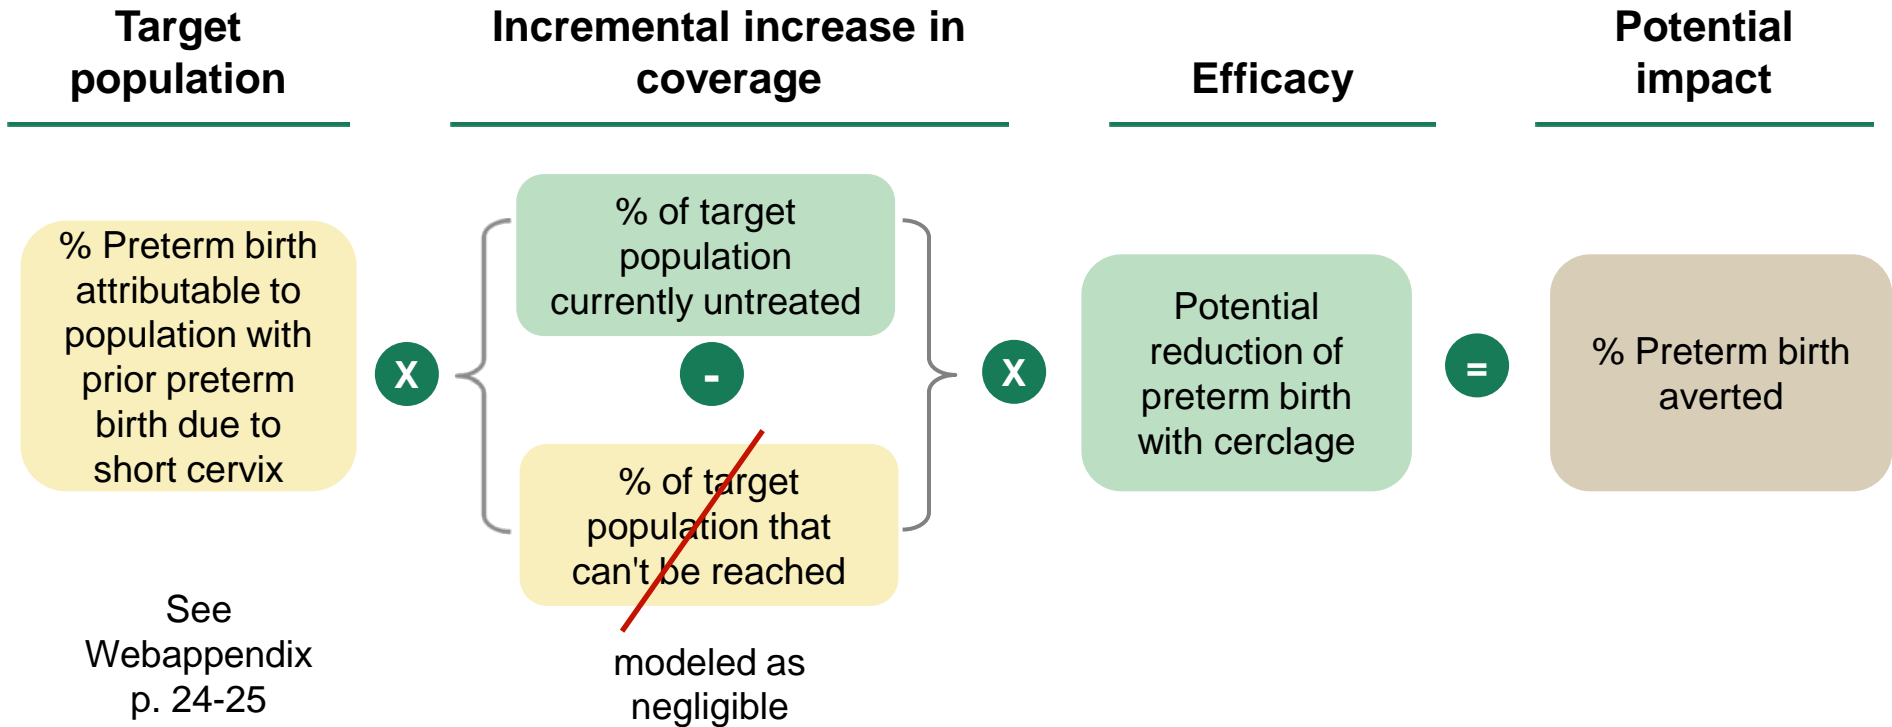

Modeled as global

Country-specific

**Webtable 15. Methodology and data used in analysis of potential impact of cervical cerclage**

| Country        | Total birth rate (babies per woman) | % Preterm birth attributed to prior preterm birth with SC |
|----------------|-------------------------------------|-----------------------------------------------------------|
| Argentina      | 2.25                                | 8.3%                                                      |
| Australia      | 1.93                                | 6.5%                                                      |
| Austria        | 1.38                                | 2.7%                                                      |
| Bahrain        | 2.63                                | 10.1%                                                     |
| Belgium        | 1.79                                | 5.6%                                                      |
| Canada         | 1.65                                | 4.6%                                                      |
| Chile          | 1.90                                | 6.3%                                                      |
| Croatia        | 1.42                                | 2.9%                                                      |
| Cyprus         | 1.51                                | 3.5%                                                      |
| Czech Republic | 1.41                                | 2.8%                                                      |
| Denmark        | 1.85                                | 6.0%                                                      |
| Estonia        | 1.64                                | 4.5%                                                      |
| Finland        | 1.84                                | 5.9%                                                      |
| France         | 1.97                                | 6.8%                                                      |
| Germany        | 1.36                                | 2.5%                                                      |
| Greece         | 1.46                                | 3.2%                                                      |
| Hungary        | 1.34                                | 2.4%                                                      |
| Ireland        | 2.10                                | 7.5%                                                      |
| Israel         | 2.91                                | 11.6%                                                     |
| Italy          | 1.38                                | 2.6%                                                      |

| Country              | Total birth rate (babies per woman) | % Preterm birth attributed to prior preterm birth with SC |
|----------------------|-------------------------------------|-----------------------------------------------------------|
| Japan                | 1.32                                | 2.2%                                                      |
| Latvia               | 1.41                                | 2.9%                                                      |
| Lithuania            | 1.41                                | 2.8%                                                      |
| Netherlands          | 1.75                                | 5.2%                                                      |
| New Zealand          | 2.14                                | 7.7%                                                      |
| Norway               | 1.92                                | 6.5%                                                      |
| Poland               | 1.32                                | 2.2%                                                      |
| Portugal             | 1.36                                | 2.5%                                                      |
| Qatar                | 2.40                                | 9.0%                                                      |
| Republic of Korea    | 1.29                                | 2.0%                                                      |
| Singapore            | 1.25                                | 1.8%                                                      |
| Slovakia             | 1.27                                | 1.9%                                                      |
| Slovenia             | 1.39                                | 2.7%                                                      |
| Spain                | 1.41                                | 2.9%                                                      |
| Sweden               | 1.90                                | 6.3%                                                      |
| Switzerland          | 1.46                                | 3.2%                                                      |
| United Arab Emirates | 1.86                                | 6.0%                                                      |
| United Kingdom       | 1.83                                | 5.8%                                                      |
| United States        | 2.07                                | 7.4%                                                      |

Webtable 16. Methodology and data used in analysis of potential impact of progesterone

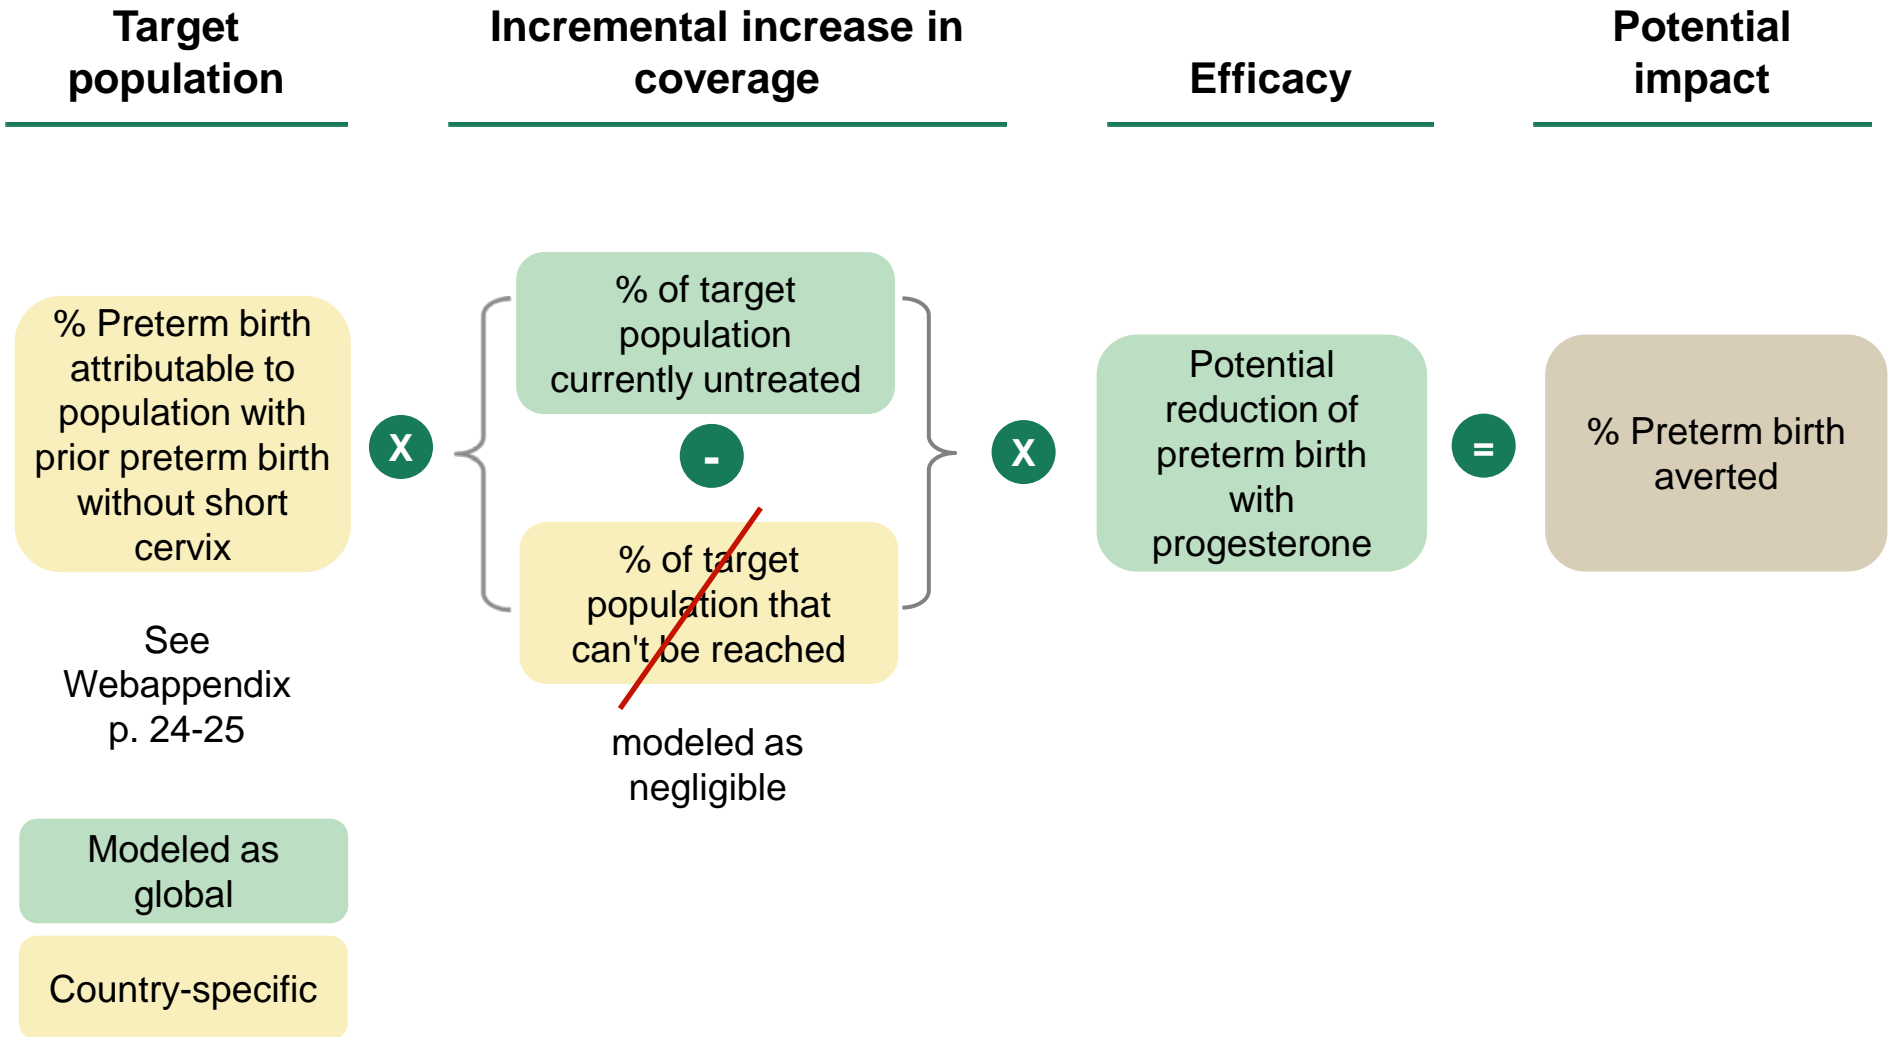

Webtable 16. Methodology and data used in analysis of potential impact of progesterone

| Country        | Total birth rate (babies per woman) | % Preterm birth attributed to prior preterm birth w/o SC |
|----------------|-------------------------------------|----------------------------------------------------------|
| Argentina      | 2.25                                | 1.8%                                                     |
| Australia      | 1.93                                | 0.9%                                                     |
| Austria        | 1.38                                | 0.4%                                                     |
| Bahrain        | 2.63                                | 2.9%                                                     |
| Belgium        | 1.79                                | 0.8%                                                     |
| Canada         | 1.65                                | 0.7%                                                     |
| Chile          | 1.90                                | 0.9%                                                     |
| Croatia        | 1.42                                | 0.4%                                                     |
| Cyprus         | 1.51                                | 0.5%                                                     |
| Czech Republic | 1.41                                | 0.4%                                                     |
| Denmark        | 1.85                                | 0.9%                                                     |
| Estonia        | 1.64                                | 0.6%                                                     |
| Finland        | 1.84                                | 0.8%                                                     |
| France         | 1.97                                | 1.0%                                                     |
| Germany        | 1.36                                | 0.4%                                                     |
| Greece         | 1.46                                | 0.5%                                                     |
| Hungary        | 1.34                                | 0.3%                                                     |
| Ireland        | 2.10                                | 1.3%                                                     |
| Israel         | 2.91                                | 3.7%                                                     |
| Italy          | 1.38                                | 0.4%                                                     |

| Country              | Total birth rate (babies per woman) | % Preterm birth attributed to prior preterm birth w/o SC |
|----------------------|-------------------------------------|----------------------------------------------------------|
| Japan                | 1.32                                | 0.3%                                                     |
| Latvia               | 1.41                                | 0.4%                                                     |
| Lithuania            | 1.41                                | 0.4%                                                     |
| Netherlands          | 1.75                                | 0.7%                                                     |
| New Zealand          | 2.14                                | 1.4%                                                     |
| Norway               | 1.92                                | 0.9%                                                     |
| Poland               | 1.32                                | 0.3%                                                     |
| Portugal             | 1.36                                | 0.4%                                                     |
| Qatar                | 2.40                                | 2.2%                                                     |
| Republic of Korea    | 1.29                                | 0.3%                                                     |
| Singapore            | 1.25                                | 0.3%                                                     |
| Slovakia             | 1.27                                | 0.3%                                                     |
| Slovenia             | 1.39                                | 0.4%                                                     |
| Spain                | 1.41                                | 0.4%                                                     |
| Sweden               | 1.90                                | 0.9%                                                     |
| Switzerland          | 1.46                                | 0.5%                                                     |
| United Arab Emirates | 1.86                                | 0.9%                                                     |
| United Kingdom       | 1.83                                | 0.8%                                                     |
| United States        | 2.07                                | 1.2%                                                     |

Webtable 17. Assumptions used in estimating preterm births attributable to women with prior preterm birth with or without short cervix

### Preterm birth in women without short cervix

---

- Overall preterm birth prevalence in target geographies = 12.8%
- Fertility rate of ~5 in target geographies
- Irrespective of the prior preterm birth order
  - P (2 Preterm birth) = 16%
  - P (3 Preterm birth) = 41%
  - P (4 Preterm birth) = 67%
  - P (5 Preterm birth) = 67%
- Efficacy of progesterone in women with history of preterm birth = 20% (37 weeks endpoint)

### Preterm birth in women with short cervix

---

- Overall preterm birth prevalence in target geographies = 12.8%
- SC defined as  $\leq 25\text{mm}$
- % of pregnant women with SC = 8%
- Fertility rate of up to 5 in the target geographies
- Recurrent pregnancies and pessary use do not change cervical length
- Irrespective of the prior preterm birth order
  - P (Preterm birth/ SC) = 48%
  - P (2 Preterm birth) = 48%
  - P (3 Preterm birth) = 48%
  - P (4 Preterm birth) = 67%
  - P (5 Preterm birth) = 67%
- Efficacy of cervical pessary in women with short cervix = 64% (37 weeks endpoint)
- Efficacy of progesterone in women with short cervix ranges from 11% (37 weeks for  $\leq 25\text{mm}$ ) - 42% (34 weeks for  $<15\text{mm}$ )

Source: WHO (2012): Born too Soon - The Global Action Report on Preterm Birth, Bloom et al - Obstet Gynecol (2001): Recurrence of preterm birth in singleton and twin pregnancies, Goya et al -Lancet. (2012): Cervical pessary in pregnant women with a short cervix: an open-label randomized controlled trial, Iams et al -NEJM (1996): The length of the cervix and the risk of spontaneous premature delivery, Dodd et al - Cochrane Library (2012): Prenatal administration of progesterone for preventing preterm birth in women considered to be at risk of preterm birth, Romero et al -Am J Obstet Gynecol (2012): Vaginal progesterone in women with an asymptomatic sonographic short cervix in the mid-trimester decreases preterm delivery and neonatal morbidity: a systematic review and meta-analysis of individual patient data

**Webtable 18. Methodology for estimating preterm births attributable to women with prior preterm birth with or without short cervix**

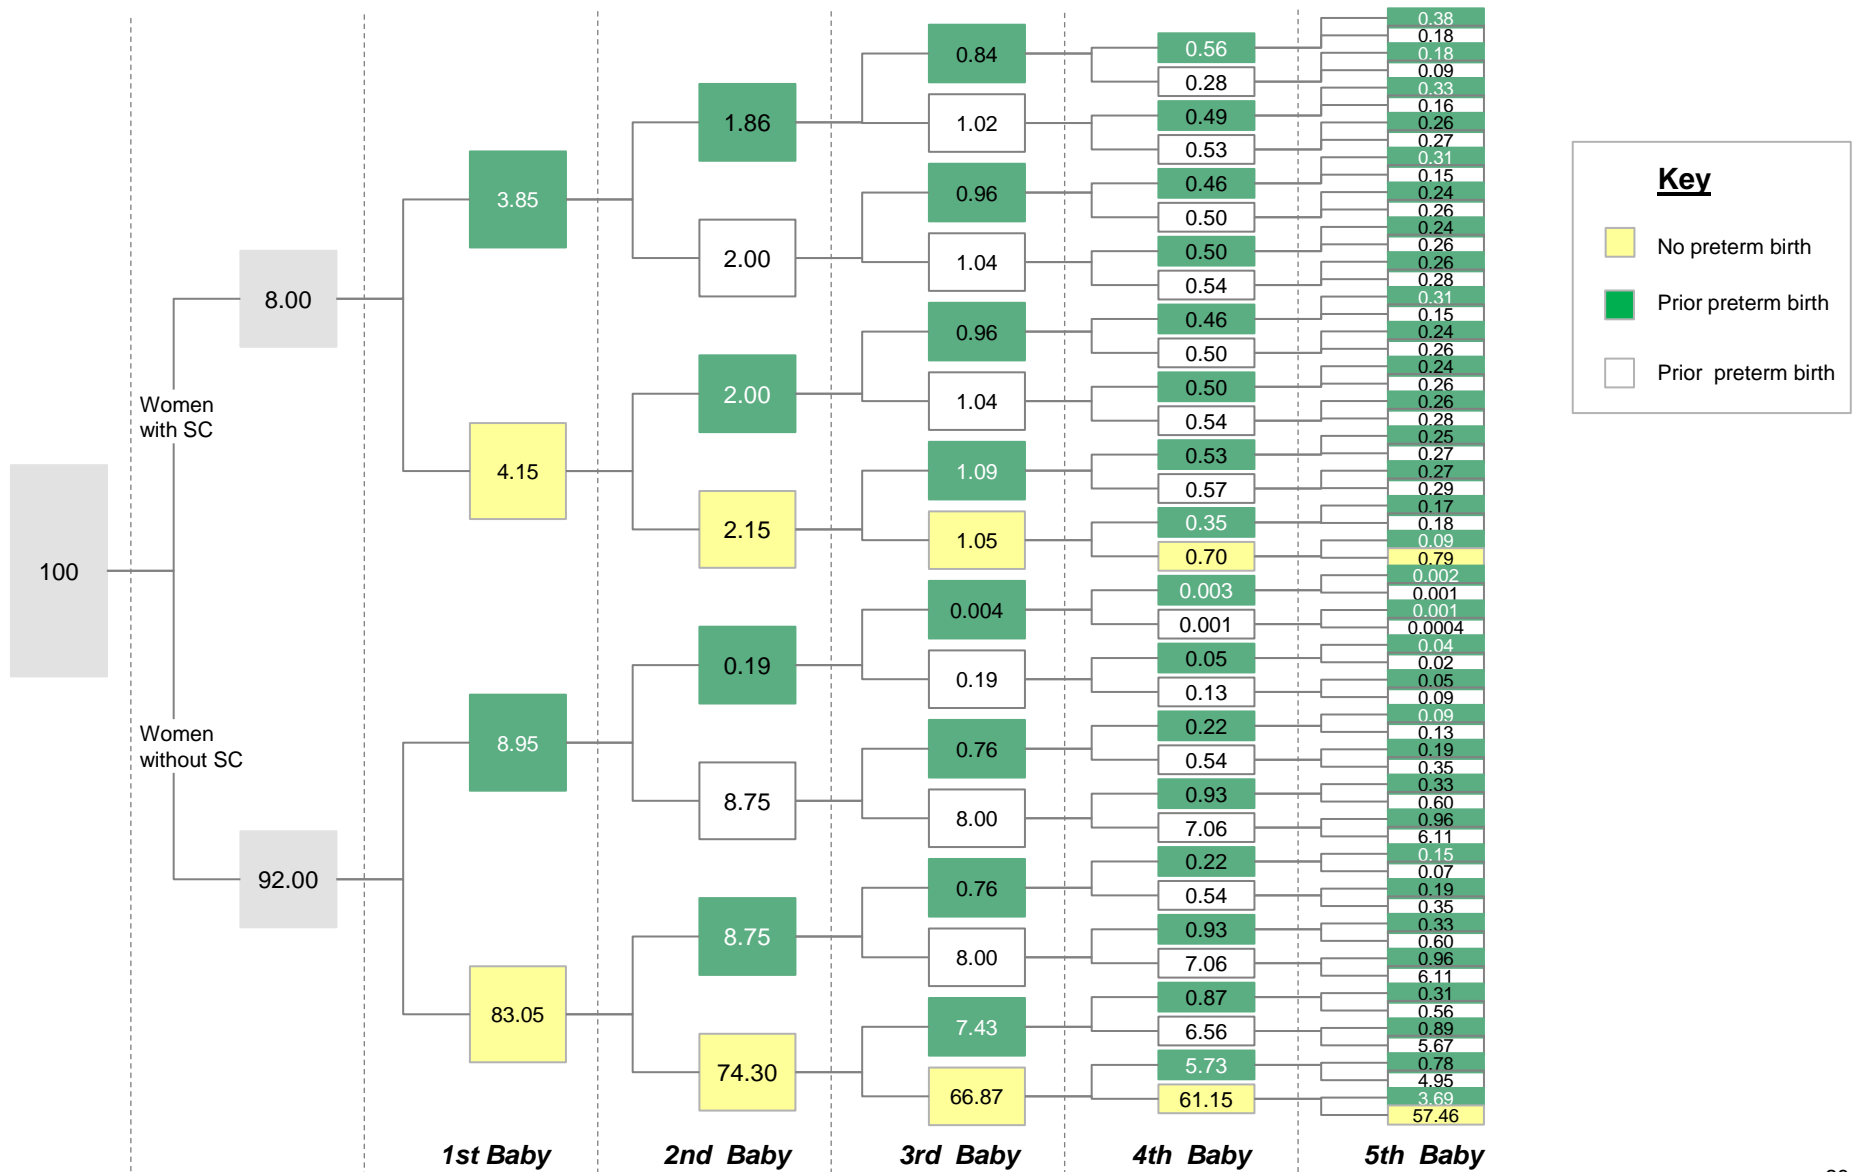



Webtable 19. Methodology and data used in analysis of potential impact of smoking

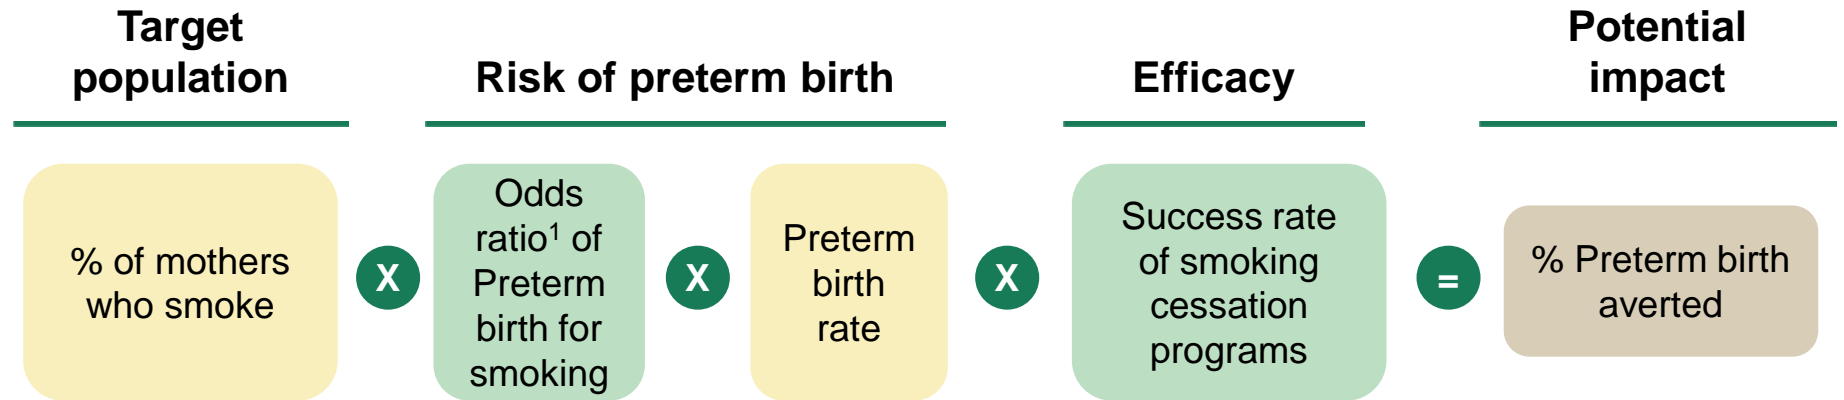

Modeled as global

Country-specific

1. We were unable to identify published results for the relative risk of preterm birth among mothers who smoke, thus the odds ratio was used instead. This is an approximation but given that the rates of preterm birth and maternal smokers are both small, and roughly equal (~10%), we expect the deviation to be small. See McNutt LA, Wu C, Xue X, Hafner JP. Estimating the relative risk in cohort studies and clinical trials of common outcomes. *Am J Epidemiol.* 2003 May 15;157(10):940-3. Source: For references on prevalence of maternal smokers for each country see next slide. Other sources: Cobb et al. *Nicotine Tob Res.* 2005, Shah et al. *Am J Obstet Gynecol* 2000

**Webtable 19. Methodology and data used in analysis of potential impact of smoking**

| Country        | Mothers who smoke (%) |
|----------------|-----------------------|
| Argentina      | -                     |
| Australia      | 18%                   |
| Austria        | -                     |
| Bahrain        | -                     |
| Belgium        | 7%                    |
| Canada         | 10%                   |
| Chile          | 28%                   |
| Croatia        | -                     |
| Cyprus         | -                     |
| Czech Republic | 4%                    |
| Denmark        | 20%                   |
| Estonia        | 9%                    |
| Finland        | 21%                   |
| France         | 22%                   |
| Germany        | 17%                   |
| Greece         | 12%                   |
| Hungary        | 20%                   |
| Ireland        | 53%                   |
| Israel         | -                     |
| Italy          | 7%                    |

| Country              | Mothers who smoke (%) |
|----------------------|-----------------------|
| Japan                | 17%                   |
| Latvia               | -                     |
| Lithuania            | 1%                    |
| Netherlands          | 8%                    |
| New Zealand          | 17%                   |
| Norway               | -                     |
| Poland               | 12%                   |
| Portugal             | 14%                   |
| Qatar                | -                     |
| Republic of Korea    | -                     |
| Singapore            | -                     |
| Slovakia             | -                     |
| Slovenia             | -                     |
| Spain                | 30%                   |
| Sweden               | 27%                   |
| Switzerland          | 10%                   |
| United Arab Emirates | -                     |
| United Kingdom       | 14%                   |
| United States        | 23%                   |

Source: Lanting et al. (2009) PLoS One, Wells (2011) The Sydney Morning Herald, Szilagyi et al. (2010) WHO, Lauria et al. (2012) Scientific World Journal, Al-Sahab et al. (2010) BMC Pregnancy Childbirth, Javier et al. (2007) Rev. chil. enferm. respir, Vogazianos (2005) Cent Eur J Publ Health, Palma et al. (2007) BMC Public Health, Jaslow (2012) CBS news (healthpop.com), Lu (2001) Health Promotion International, Lee et al. (1994) BMJ, Kaneita et al. (2006) Prev Med, Jensen et al. (2004) Am J Epidemiol, Wojtyła et al. (2012) Ann Agric Environ Med, MacDorman et al. (1997) Am J Epidemiol, Tarrant et al. (2011) Eur J Clin Nutr., Kankudti (2012) Medical daily

Webtable 19. Methodology and data used in analysis of potential impact of smoking

## Smoking cessation programs vary greatly in their reported efficacy...

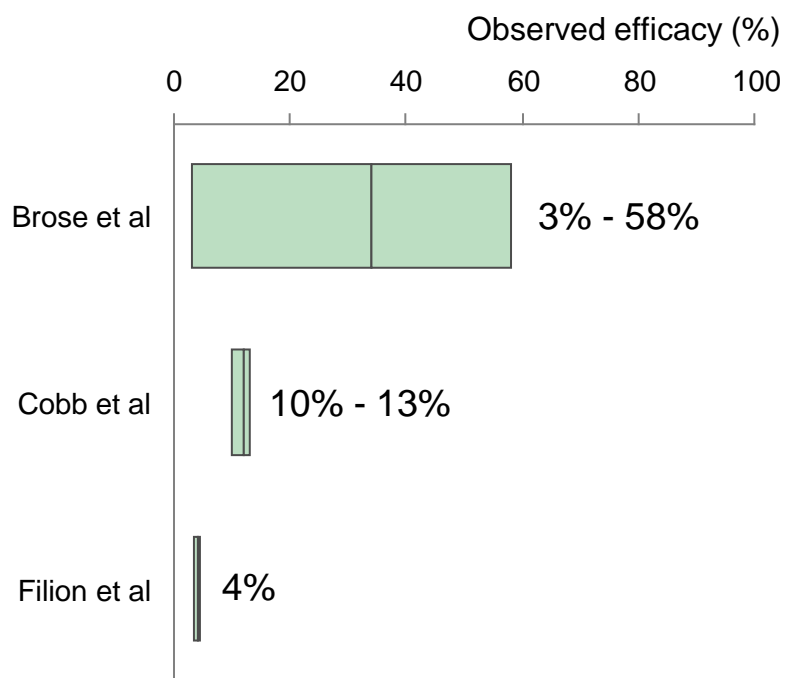

## ...as well as program design and target population

| Reference                                    | Types of program                                 | Target population     |
|----------------------------------------------|--------------------------------------------------|-----------------------|
| Brose et al. (2011)<br>Thorax                | Individual, group, and telephone counseling      | All comers            |
|                                              | Medication treatment                             |                       |
| Cobb et al. (2005)<br>Nicotine Tob Res.      | Disseminated smoking cessation Website (QuitNet) | All comers            |
| Filion et al. (2011)<br>BJOG (meta-analysis) | Individual, group, and telephone counseling      | Pregnant smokers only |

Webtable 20. Methodology and data used in analysis of potential impact of non-medically indicated caesarean delivery and labor induction

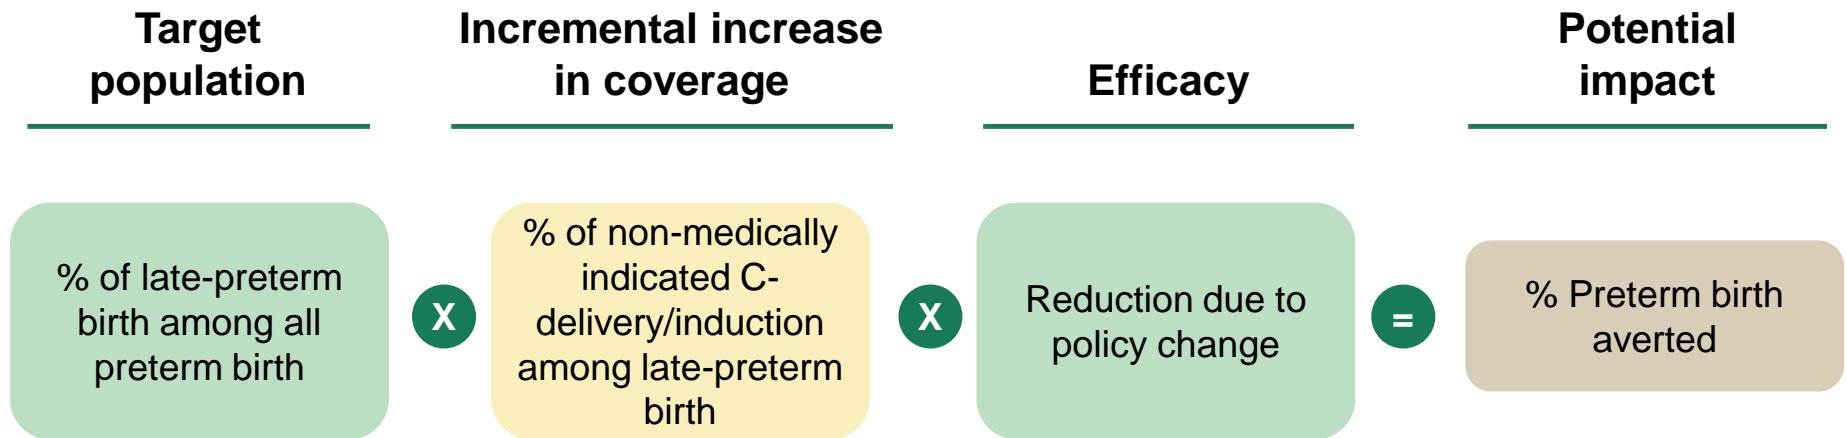

Modeled as global

Country-specific

Webtable 20. Methodology and data used in analysis of potential impact of non-medically indicated caesarean delivery and labor induction

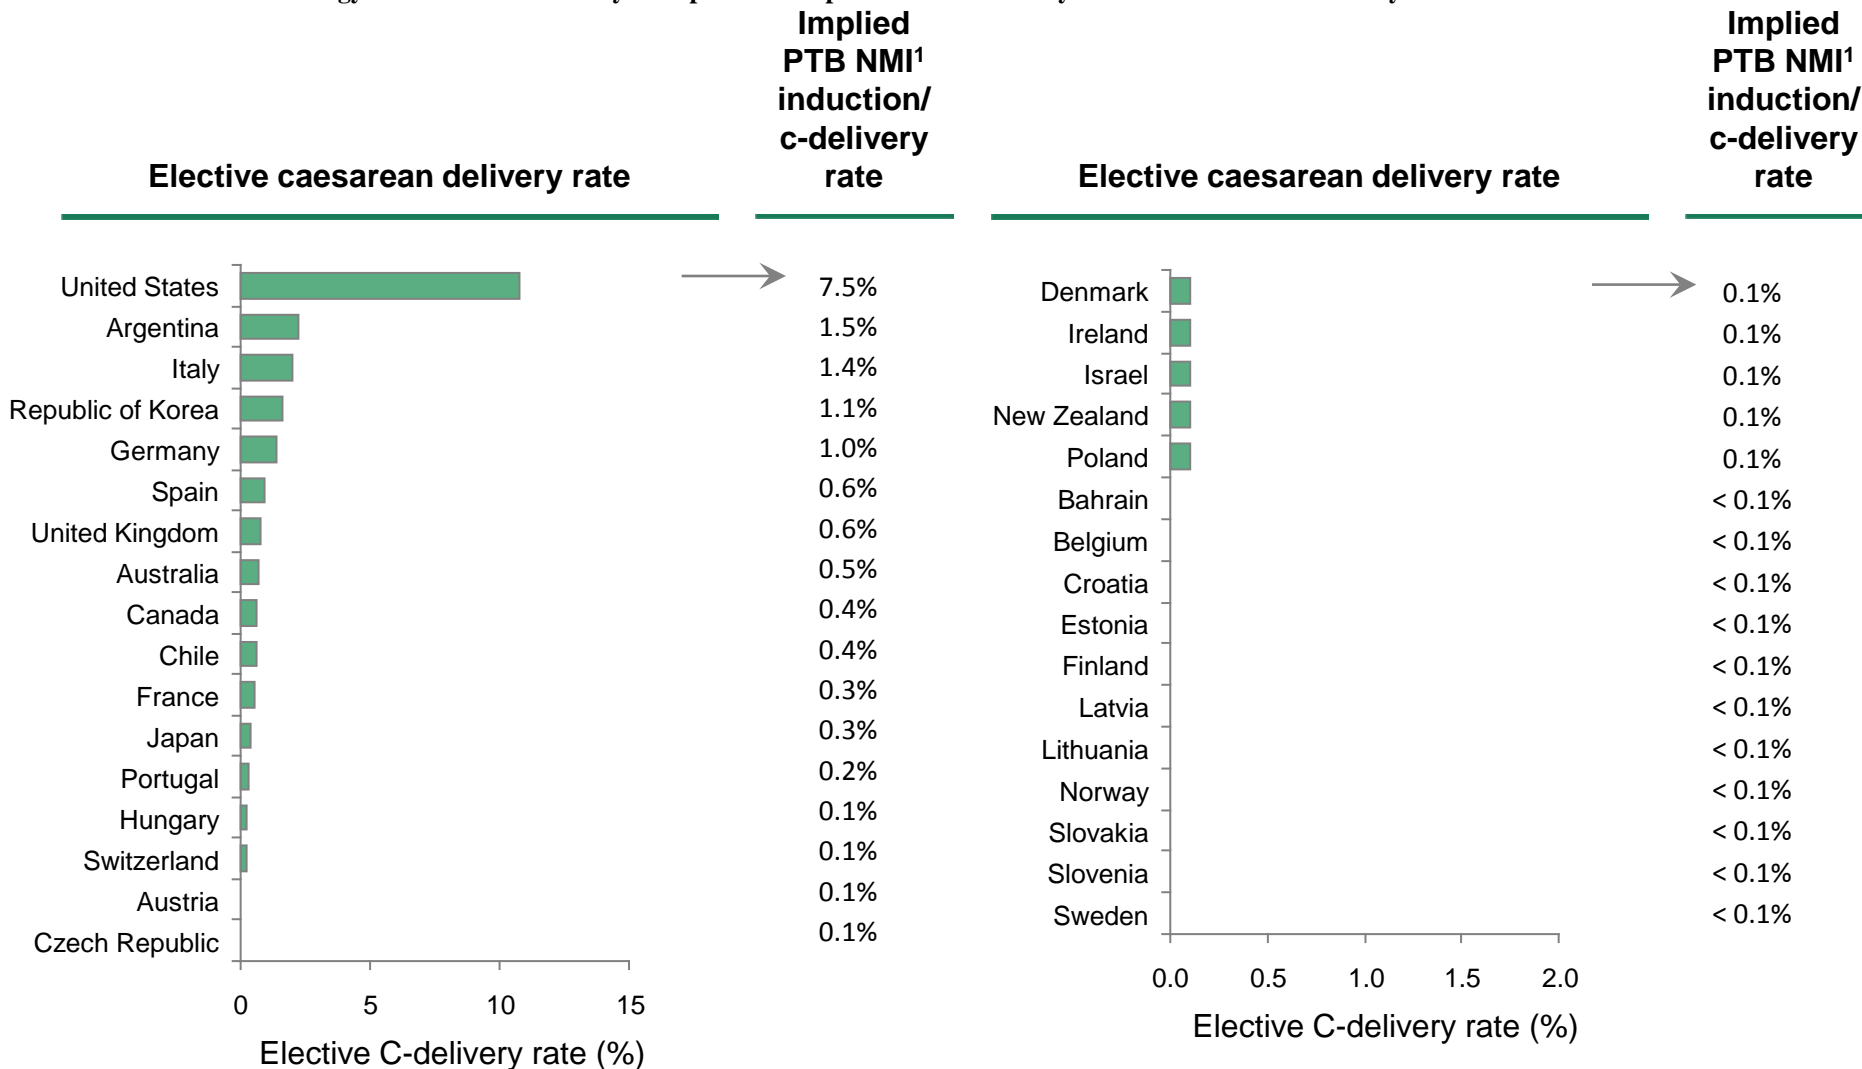

1. Non-medically indicated. Shows here data for only the countries with elective caesarean delivery rates from the literature. European average used for others in the complete analysis. Source: The Global Numbers and Costs of Additionally Needed and Unnecessary Caesarean Sections Performed per Year, World Health Report (2010), Background Paper, 30

Webtable 21. Methodology and data used in analysis of potential impact of preterm births as result of multiple births from assisted reproductive technology

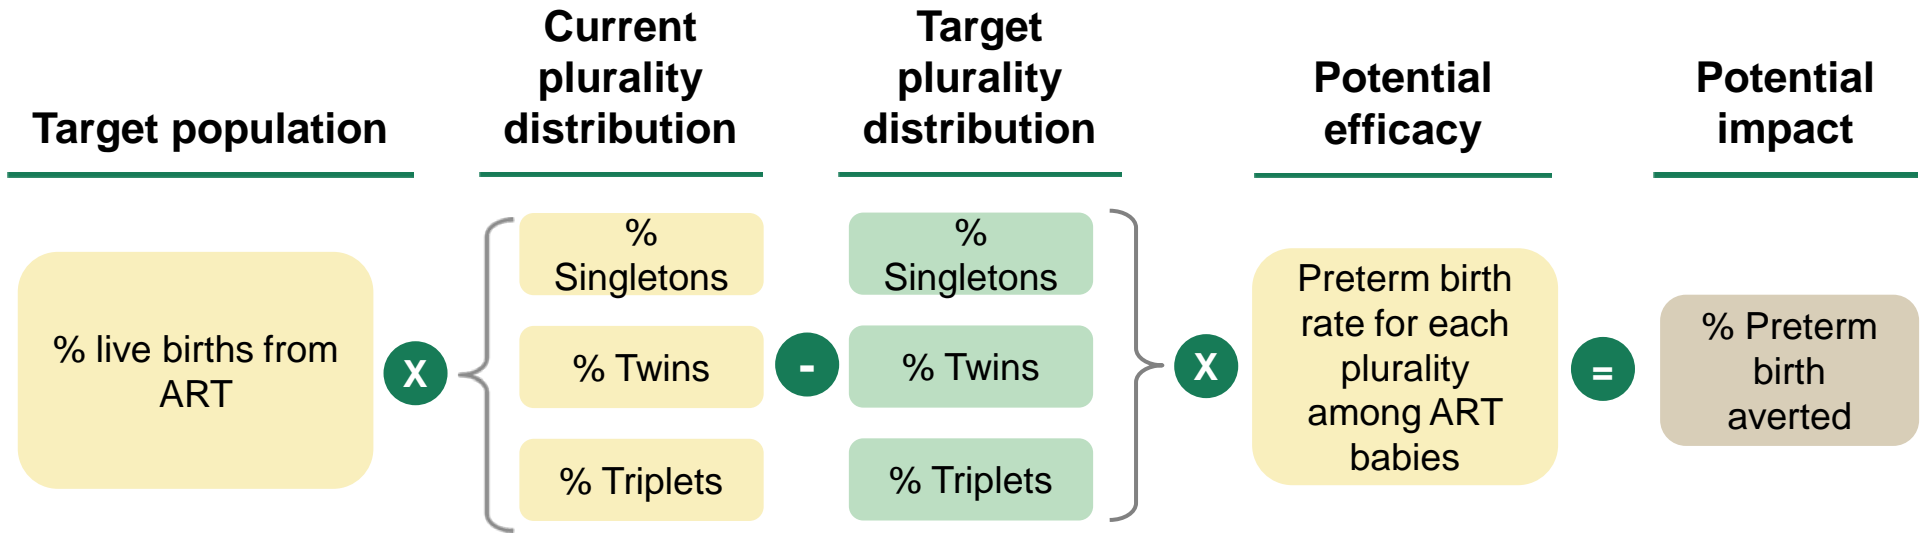

Modeled as global

Country-specific

**Webtable 21. Methodology and data used in analysis of potential impact of preterm births as result of multiple births from assisted reproductive technology**

| Country        | Decreasing multiple births from ART |                         |                     |                        |                          |                      |                         |                              |                         |                            |
|----------------|-------------------------------------|-------------------------|---------------------|------------------------|--------------------------|----------------------|-------------------------|------------------------------|-------------------------|----------------------------|
|                | % ART live births (2009)            | Curr. ART singleton (%) | Curr. ART twins (%) | Curr. ART triplets (%) | Target ART singleton (%) | Target ART twins (%) | Target ART triplets (%) | Preterm birth rate singleton | Preterm birth rate twin | Preterm birth rate triplet |
| Argentina      |                                     |                         |                     |                        | 89.5%                    | 10.0%                | 0.5%                    |                              |                         |                            |
| Australia      |                                     |                         |                     |                        | 89.5%                    | 10.0%                | 0.5%                    |                              |                         |                            |
| Austria        |                                     |                         |                     |                        | 89.5%                    | 10.0%                | 0.5%                    |                              |                         |                            |
| Bahrain        |                                     |                         |                     |                        | 89.5%                    | 10.0%                | 0.5%                    |                              |                         |                            |
| Belgium        | 3.9%                                | 86.4%                   | 13.3%               | 0.4%                   | 89.6%                    | 10.0%                | 0.4%                    | 9.0%                         | 55.2%                   | 81.9%                      |
| Canada         |                                     |                         |                     |                        | 89.5%                    | 10.0%                | 0.5%                    |                              |                         |                            |
| Chile          |                                     |                         |                     |                        | 89.5%                    | 10.0%                | 0.5%                    |                              |                         |                            |
| Croatia        |                                     |                         |                     |                        | 89.5%                    | 10.0%                | 0.5%                    |                              |                         |                            |
| Cyprus         |                                     |                         |                     |                        | 89.5%                    | 10.0%                | 0.5%                    |                              |                         |                            |
| Czech Republic |                                     |                         |                     |                        | 89.5%                    | 10.0%                | 0.5%                    |                              |                         |                            |
| Denmark        | 4.6%                                | 89.9%                   | 9.8%                | 0.3%                   | 89.9%                    | 9.8%                 | 0.3%                    |                              |                         |                            |
| Estonia        | 4.1%                                | 79.4%                   | 17.5%               | 3.2%                   | 89.5%                    | 10.0%                | 0.5%                    |                              |                         |                            |
| Finland        | 3.1%                                | 89.6%                   | 10.0%               | 0.4%                   | 89.6%                    | 10.0%                | 0.4%                    | 6.7%                         | 53.2%                   | 100.0%                     |
| France         |                                     | 90.2%                   | 9.8%                | 0.1%                   | 90.1%                    | 9.8%                 | 0.1%                    |                              |                         |                            |
| Germany        | 1.7%                                | 84.9%                   | 14.8%               | 0.4%                   | 89.6%                    | 10.0%                | 0.4%                    | 11.2%                        | 62.3%                   | 95.4%                      |
| Greece         |                                     | 88.0%                   | 12.0%               | 0.0%                   | 90.0%                    | 10.0%                | 0.0%                    | 22.2%                        | 84.6%                   | 100.0%                     |
| Hungary        |                                     | 80.7%                   | 18.4%               | 0.9%                   | 89.5%                    | 10.0%                | 0.5%                    |                              |                         |                            |
| Ireland        |                                     | 86.8%                   | 12.1%               | 1.1%                   | 89.5%                    | 10.0%                | 0.5%                    |                              |                         |                            |
| Israel         |                                     |                         |                     |                        | 89.5%                    | 10.0%                | 0.5%                    |                              |                         |                            |
| Italy          | 1.3%                                | 83.3%                   | 16.7%               | 0.0%                   | 90.0%                    | 10.0%                | 0.0%                    |                              |                         |                            |

**Webtable 21. Methodology and data used in analysis of potential impact of preterm births as result of multiple births from assisted reproductive technology (continued)**

| Country              | Decreasing multiple births from ART |                         |                     |                        |                          |                      |                         |                              |                         |                            |
|----------------------|-------------------------------------|-------------------------|---------------------|------------------------|--------------------------|----------------------|-------------------------|------------------------------|-------------------------|----------------------------|
|                      | % ART live births (2009)            | Curr. ART singleton (%) | Curr. ART twins (%) | Curr. ART triplets (%) | Target ART singleton (%) | Target ART twins (%) | Target ART triplets (%) | Preterm birth rate singleton | Preterm birth rate twin | Preterm birth rate triplet |
| Japan                |                                     |                         |                     |                        | 89.5%                    | 10.0%                | 0.5%                    |                              |                         |                            |
| Latvia               |                                     |                         |                     |                        | 89.5%                    | 10.0%                | 0.5%                    |                              |                         |                            |
| Lithuania            |                                     | 100.0%                  | 0.0%                | 0.0%                   | 100.0%                   | 0.0%                 | 0.0%                    |                              |                         |                            |
| Netherlands          |                                     |                         |                     |                        | 89.5%                    | 10.0%                | 0.5%                    |                              |                         |                            |
| New Zealand          |                                     |                         |                     |                        | 89.5%                    | 10.0%                | 0.5%                    |                              |                         |                            |
| Norway               |                                     | 91.1%                   | 8.9%                | 0.0%                   | 91.1%                    | 8.9%                 | 0.0%                    |                              |                         |                            |
| Poland               |                                     | 80.9%                   | 18.3%               | 0.7%                   | 89.5%                    | 10.0%                | 0.5%                    | 30.7%                        | 64.1%                   | 100.0%                     |
| Portugal             | 1.3%                                | 81.4%                   | 18.6%               | 0.0%                   | 90.0%                    | 10.0%                | 0.0%                    | 10.0%                        | 60.0%                   | 100.0%                     |
| Qatar                |                                     |                         |                     |                        | 89.5%                    | 10.0%                | 0.5%                    |                              |                         |                            |
| Republic of Korea    |                                     |                         |                     |                        | 89.5%                    | 10.0%                | 0.5%                    |                              |                         |                            |
| Singapore            |                                     |                         |                     |                        | 89.5%                    | 10.0%                | 0.5%                    |                              |                         |                            |
| Slovakia             |                                     |                         |                     |                        | 89.5%                    | 10.0%                | 0.5%                    |                              |                         |                            |
| Slovenia             | 4.4%                                | 87.5%                   | 12.5%               | 0.0%                   | 90.0%                    | 10.0%                | 0.0%                    | 10.1%                        | 55.5%                   | 100.0%                     |
| Spain                |                                     | 80.9%                   | 18.6%               | 0.5%                   | 89.5%                    | 10.0%                | 0.5%                    | 11.3%                        | 54.8%                   | 94.6%                      |
| Sweden               | 3.3%                                | 94.7%                   | 5.2%                | 0.1%                   | 94.7%                    | 5.2%                 | 0.1%                    | 5.2%                         | 35.8%                   | 100.0%                     |
| Switzerland          |                                     | 85.3%                   | 14.3%               | 0.4%                   | 89.6%                    | 10.0%                | 0.4%                    | 49.0%                        | 97.1%                   | 100.0%                     |
| United Arab Emirates |                                     |                         |                     |                        | 89.5%                    | 10.0%                | 0.5%                    |                              |                         |                            |
| United Kingdom       | 1.9%                                | 85.0%                   | 14.9%               | 0.1%                   | 89.9%                    | 10.0%                | 0.1%                    | 9.2%                         | 51.7%                   | 97.6%                      |
| United States        | 1.5%                                | 69.5%                   | 28.9%               | 1.6%                   | 89.5%                    | 10.0%                | 0.5%                    | 25.0%                        | 60.0%                   | 97.5%                      |



**Webtable 22. Projected preterm births averted and estimated total economic cost savings assuming application of selected interventions among VHDI countries**

| Country        | Preterm birth averted (#) | Estimated incremental cost per preterm birth (US\$) | Total economic cost saved (US\$) |
|----------------|---------------------------|-----------------------------------------------------|----------------------------------|
| Argentina      | 2769                      | \$22,558                                            | \$ 62,455,672                    |
| Australia      | 1158                      | \$54,708                                            | \$ 63,349,218                    |
| Austria        | 403                       | \$56,880                                            | \$ 22,921,722                    |
| Bahrain        | 161                       | \$34,139                                            | \$ 5,483,241                     |
| Belgium        | 485                       | \$57,727                                            | \$ 27,996,405                    |
| Canada         | 1491                      | \$51,680                                            | \$ 77,064,011                    |
| Chile          | 873                       | \$30,760                                            | \$ 26,851,998                    |
| Croatia        | 118                       | \$33,959                                            | \$ 4,006,403                     |
| Cyprus         | 95                        | \$80,928                                            | \$ 7,673,771                     |
| Czech Republic | 419                       | \$30,835                                            | \$ 12,921,872                    |
| Denmark        | 213                       | \$73,913                                            | \$ 15,756,535                    |
| Estonia        | 47                        | \$32,207                                            | \$ 1,498,825                     |
| Finland        | 168                       | \$62,709                                            | \$ 10,531,980                    |
| France         | 2655                      | \$59,250                                            | \$ 157,327,905                   |
| Germany        | 3212                      | \$55,627                                            | \$ 178,680,686                   |
| Greece         | 388                       | \$45,819                                            | \$ 17,762,505                    |
| Hungary        | 426                       | \$33,247                                            | \$ 14,152,472                    |
| Ireland        | 229                       | \$64,826                                            | \$ 14,864,544                    |
| Israel         | 619                       | \$42,738                                            | \$ 26,456,495                    |
| Italy          | 1817                      | \$55,612                                            | \$ 101,051,272                   |

Notes: discrepancy between the estimated total economic cost saved and that obtained by multiplying preterm births averted by estimated incremental cost per preterm birth shown above are due to rounding errors.

**Webtable 22. Projected preterm births averted and estimated total economic cost savings assuming application of selected interventions among VHDI countries (continued)**

| Country              | Preterm birth averted (#) | Estimated incremental cost per preterm birth (US\$) | Total economic cost saved (US\$) |
|----------------------|---------------------------|-----------------------------------------------------|----------------------------------|
| Japan                | 3177                      | \$ 23,974                                           | \$ 192,708,092                   |
| Latvia               | 64                        | \$ 3,581                                            | \$ 1,766,538                     |
| Lithuania            | 99                        | \$ 3,683                                            | \$ 2,730,382                     |
| Netherlands          | 731                       | \$ 31,838                                           | \$ 42,055,172                    |
| New Zealand          | 243                       | \$ 19,622                                           | \$ 13,534,523                    |
| Norway               | 182                       | \$ 48,805                                           | \$ 12,935,261                    |
| Poland               | 1361                      | \$ 4,074                                            | \$ 40,569,900                    |
| Portugal             | 378                       | \$ 14,784                                           | \$ 16,618,862                    |
| Qatar                | 109                       | \$ 12,945                                           | \$ 4,230,503                     |
| Republic of Korea    | 2197                      | \$ 8,289                                            | \$ 87,321,772                    |
| Singapore            | 262                       | \$ 7,397                                            | \$ 8,758,049                     |
| Slovakia             | 180                       | \$ 5,160                                            | \$ 5,103,167                     |
| Slovenia             | 76                        | \$ 12,455                                           | \$ 2,968,409                     |
| Spain                | 1856                      | \$ 17,732                                           | \$ 91,078,827                    |
| Sweden               | 334                       | \$ 30,555                                           | \$ 21,598,781                    |
| Switzerland          | 283                       | \$ 46,019                                           | \$ 20,442,060                    |
| United Arab Emirates | 346                       | \$ 7,388                                            | \$ 11,861,126                    |
| United Kingdom       | 2965                      | \$ 25,688                                           | \$ 176,946,605                   |
| United States        | 25872                     | \$ 51,600                                           | \$ 1,334,995,254                 |
| <b>Total</b>         | <b>58458</b>              |                                                     | <b>\$ 2,937,030,812</b>          |

Notes: discrepancy between the estimated total economic cost saved and that obtained by multiplying preterm births averted by estimated incremental cost per preterm birth shown above are due to rounding errors.

Webtable 23. Average annual rate of change (AARC) in preterm birth rates for 12 countries with high-quality data for 1990-2010

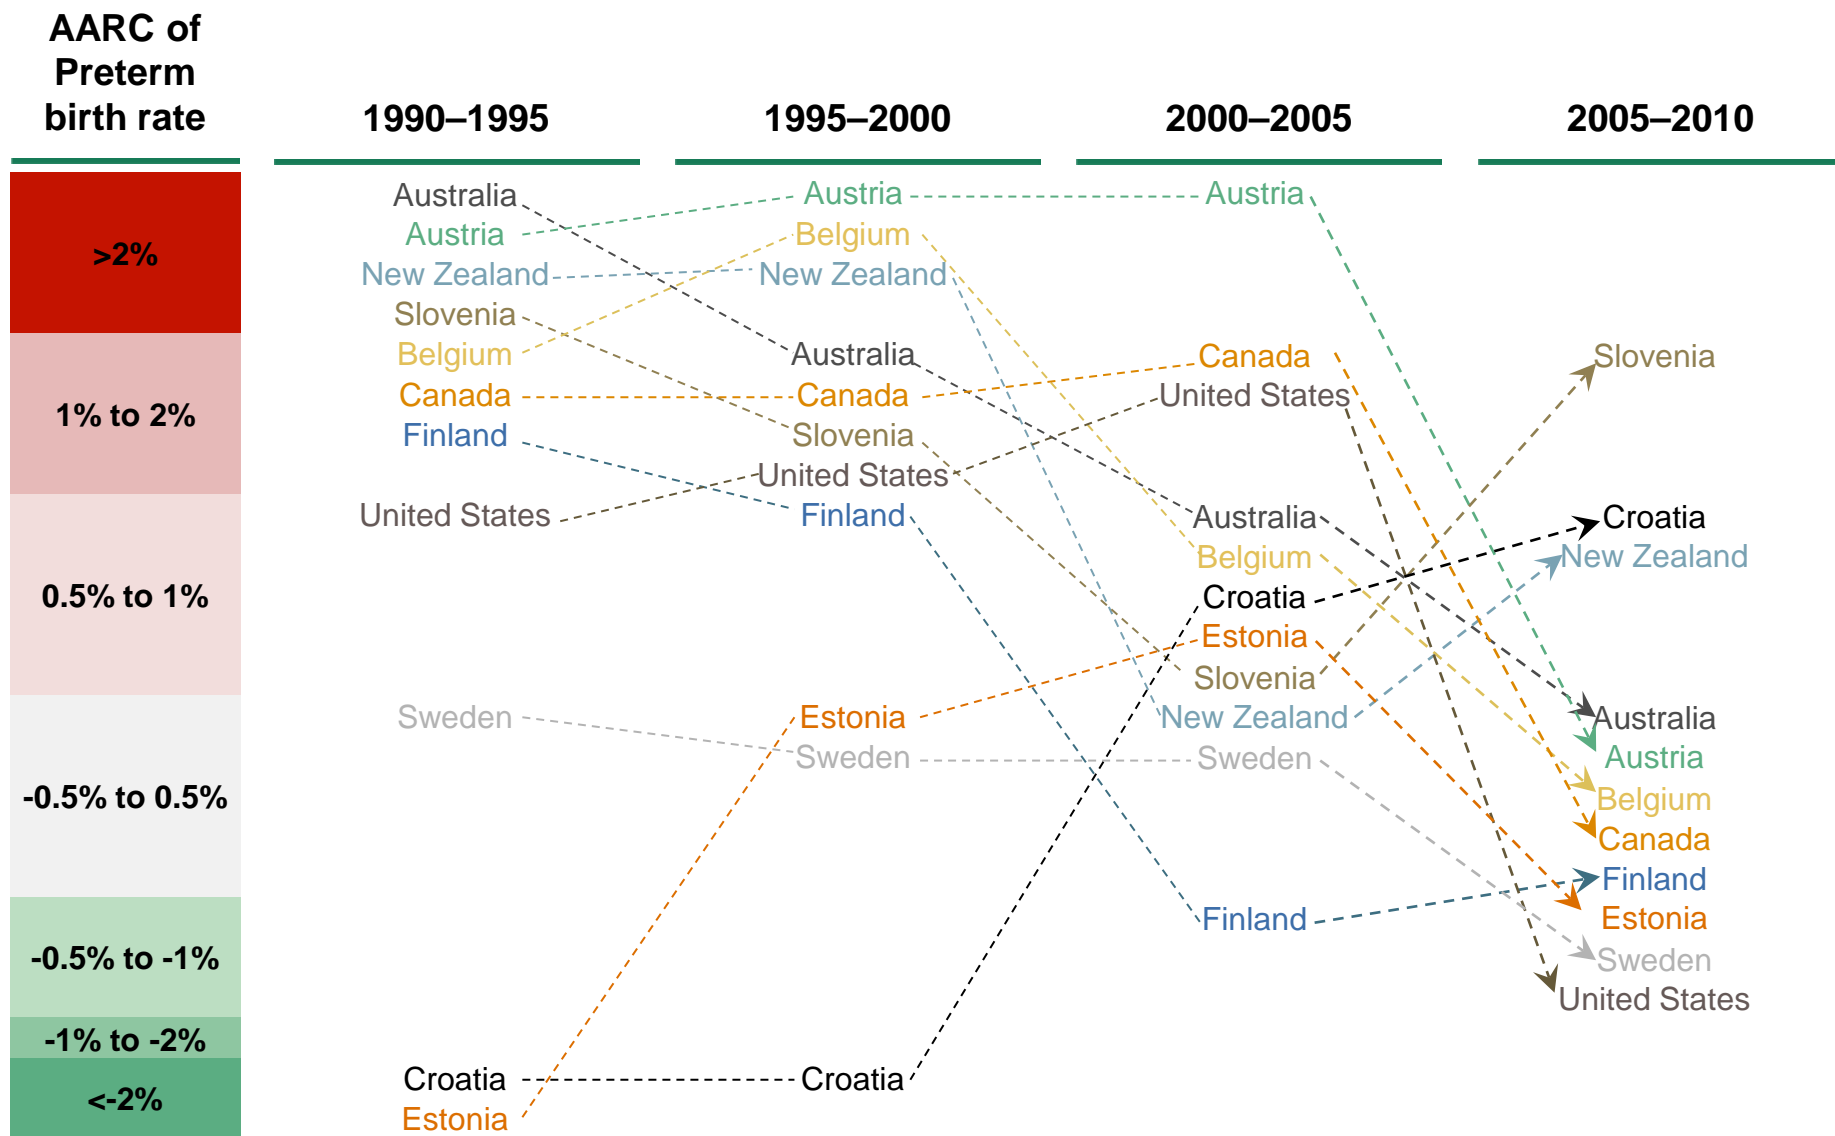

Footnote: AAR = averaged annual reduction. Shown for the 12 countries with Loess regressed data for 1990-2010, 11 of which are UNDP VHDI countries

Webtable 24. Projected 2015 preterm birth rates assuming various models for 26 VHDI countries with high-quality preterm birth data for 2000-2010

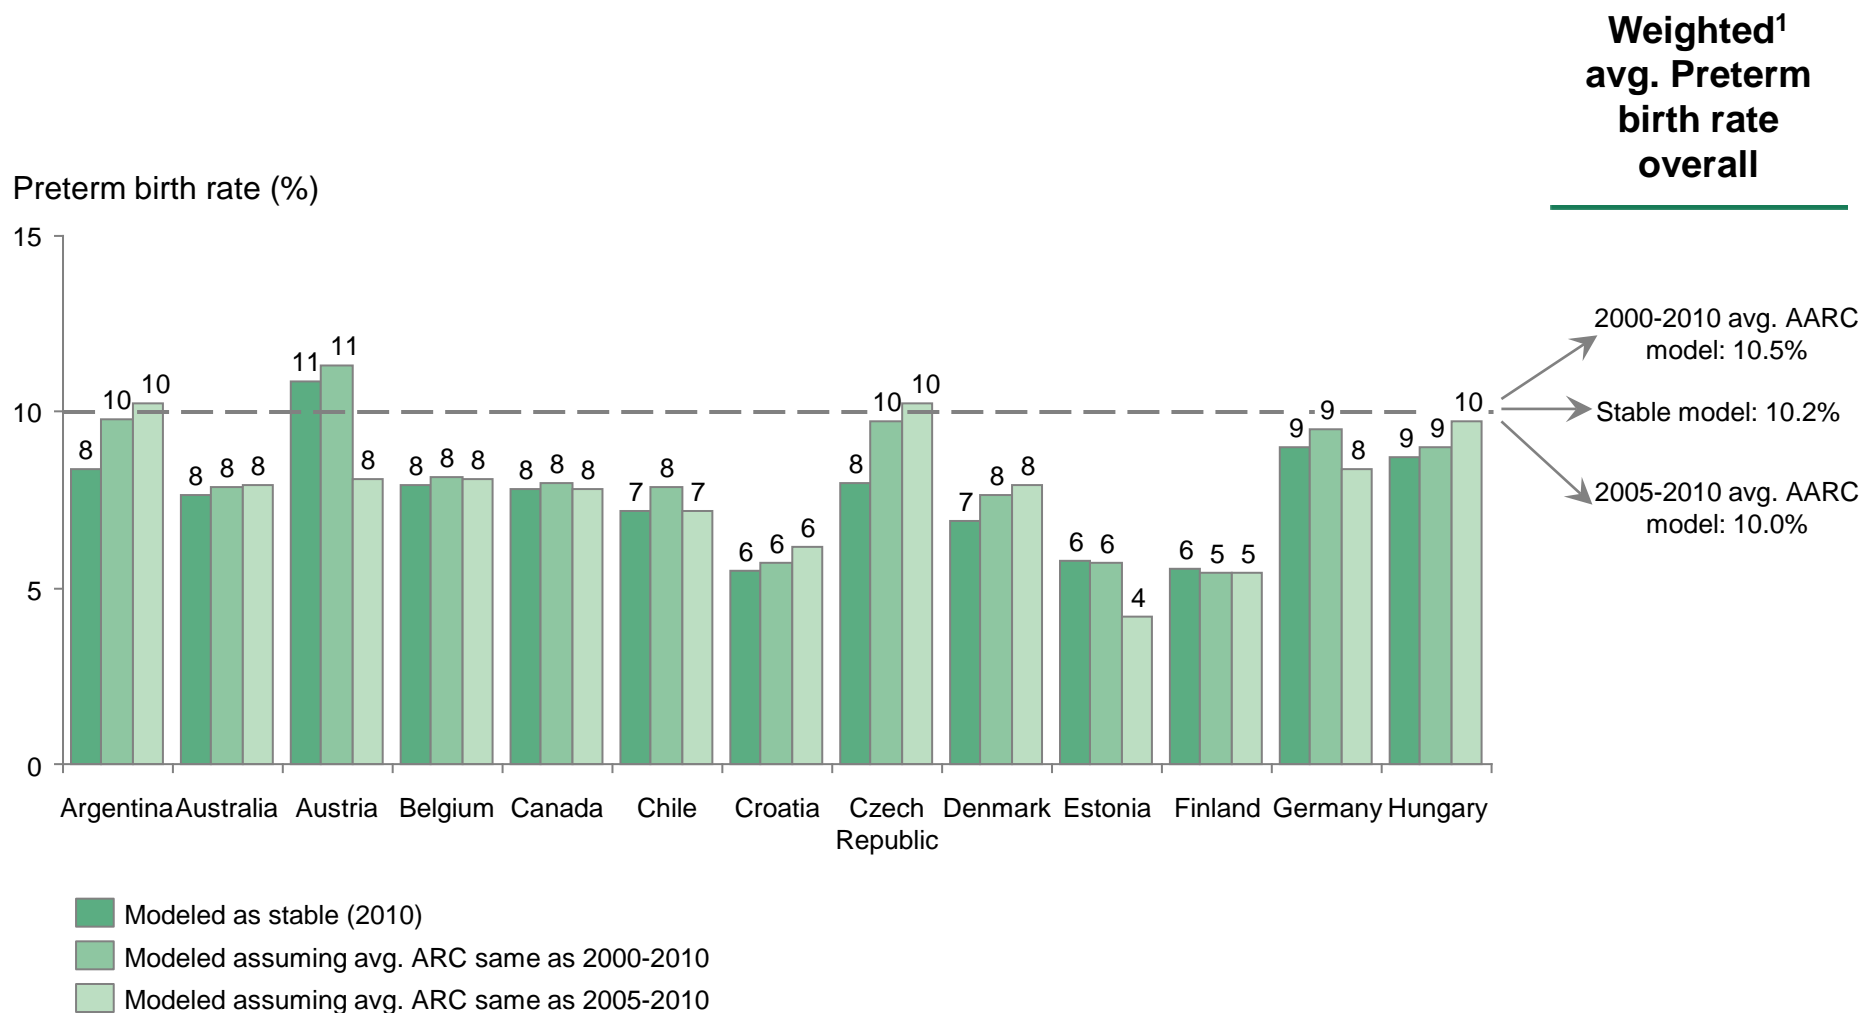

1. Weighted by total preterm births for 2010.

**Webtable 24. Projected 2015 preterm birth rates assuming various models for 26 VHDI countries with high-quality preterm birth data for 2000-2010 (continued)**

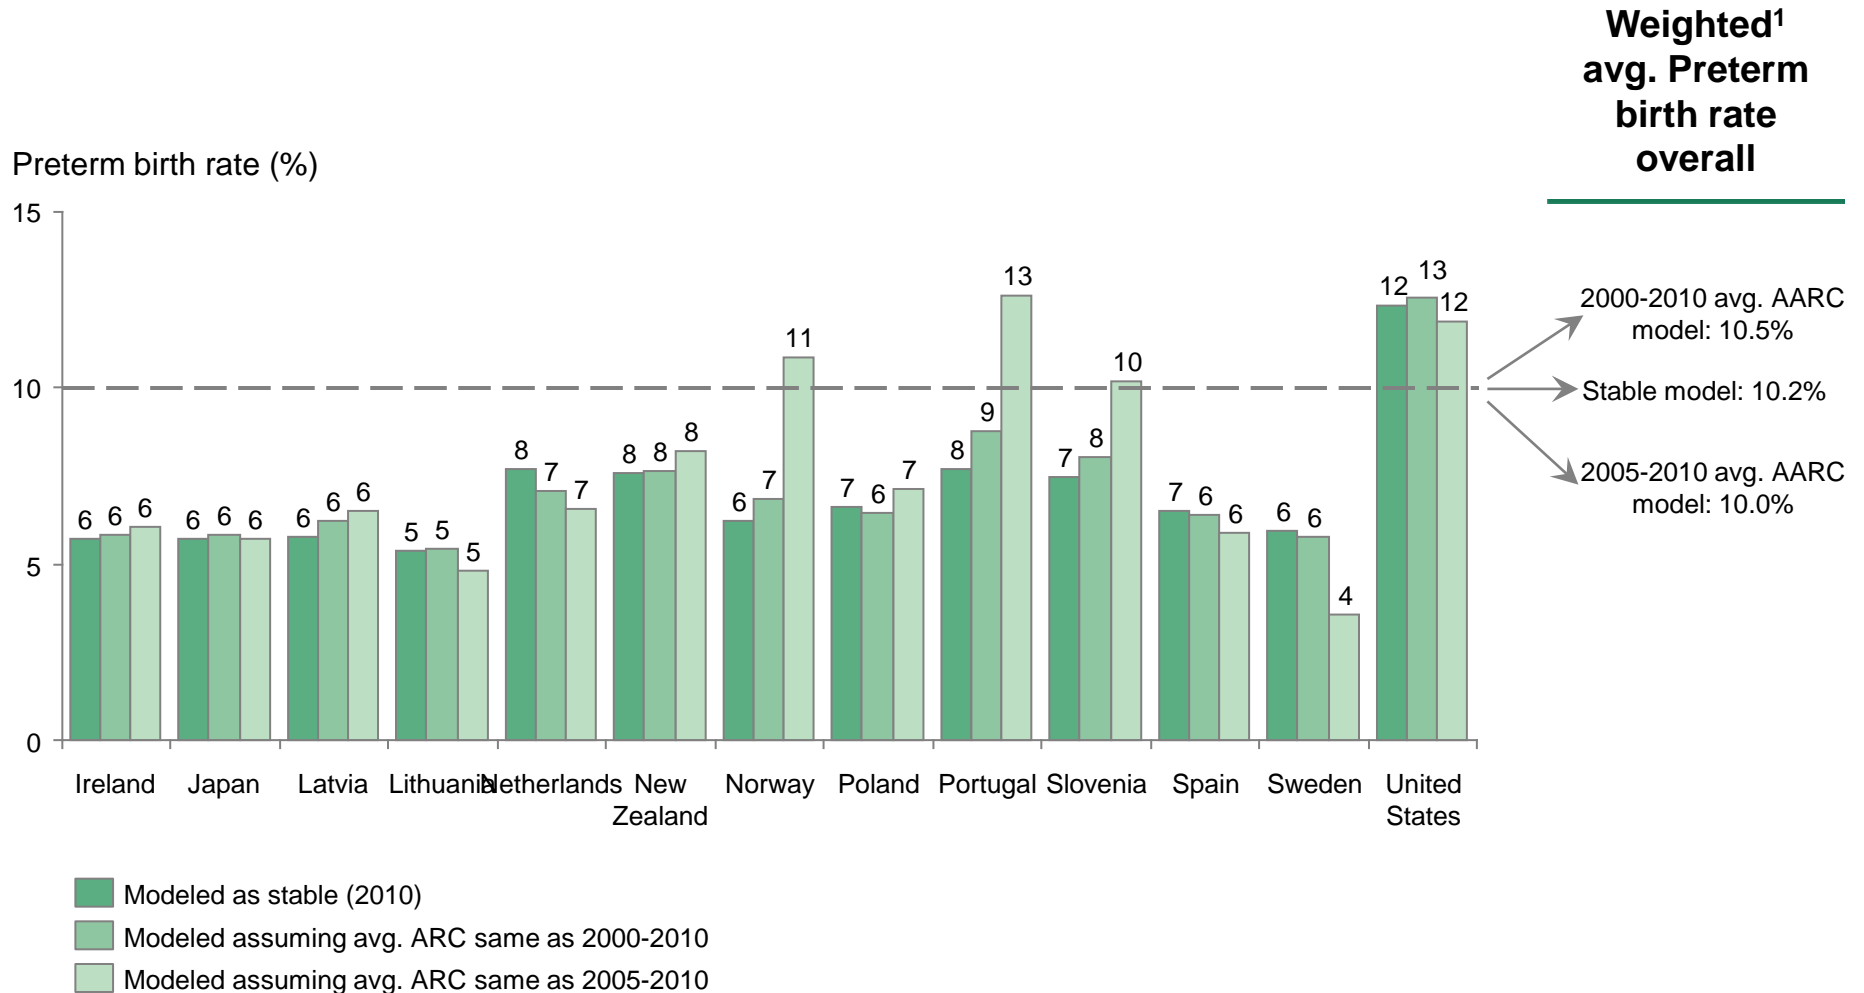

1. Weighted by total preterm births for 2010

Webtable 25. Estimated preterm birth rates before and after applying the 5 selected interventions for 39 VHDI countries

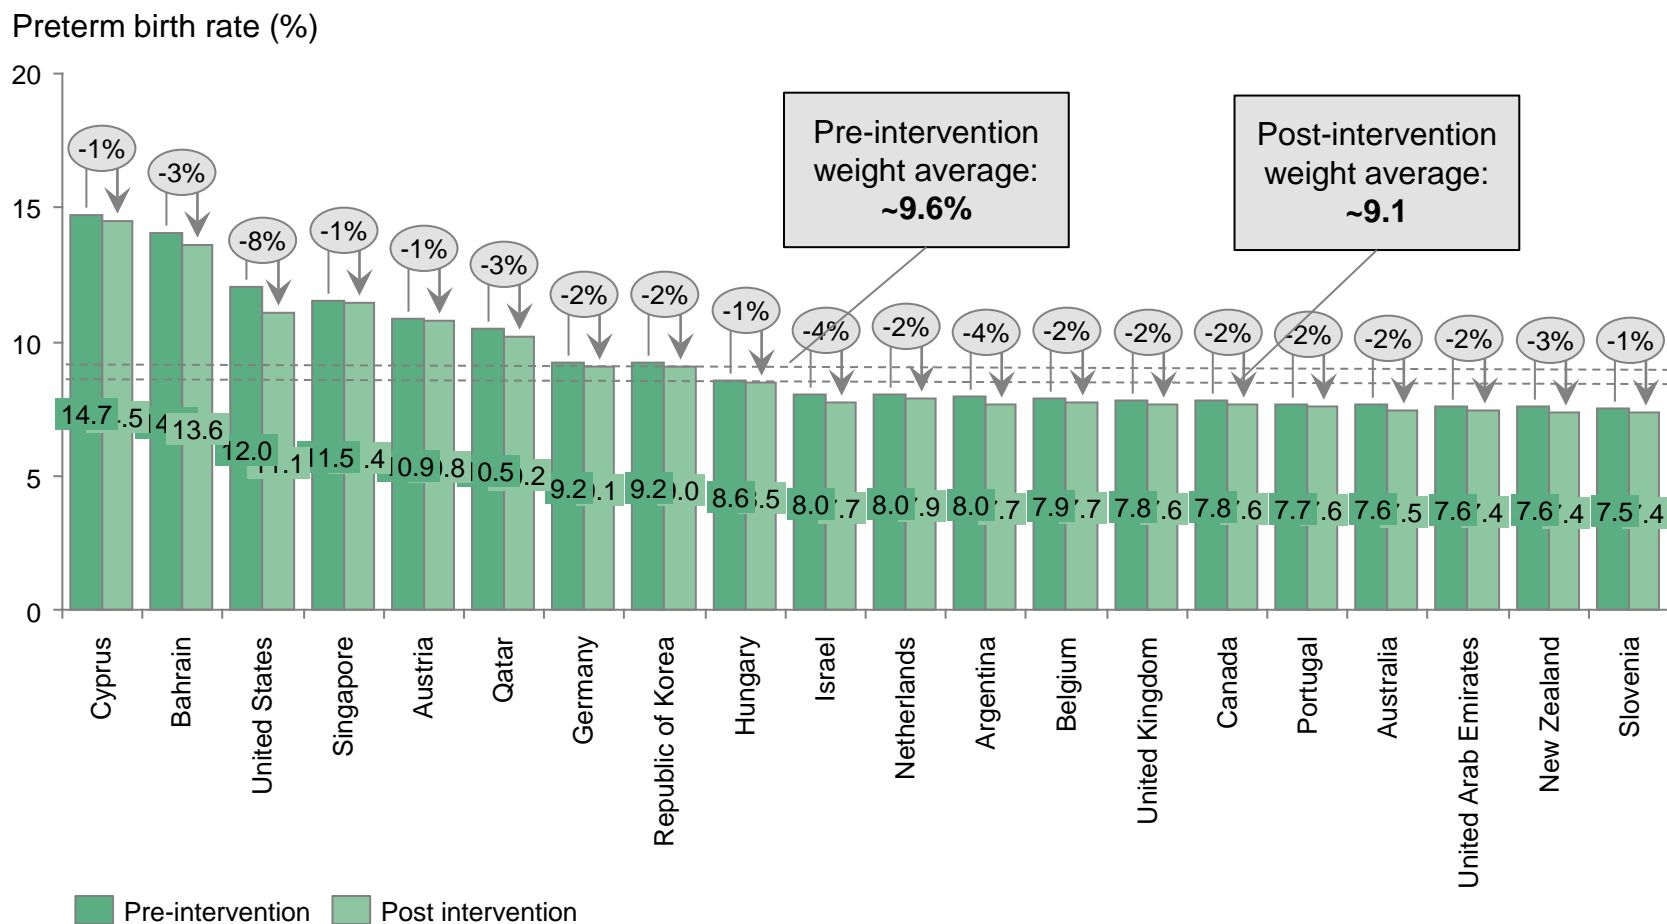

Webtable 25. Estimated preterm birth rates before and after applying the 5 selected interventions for 39 VHDI countries (continued)

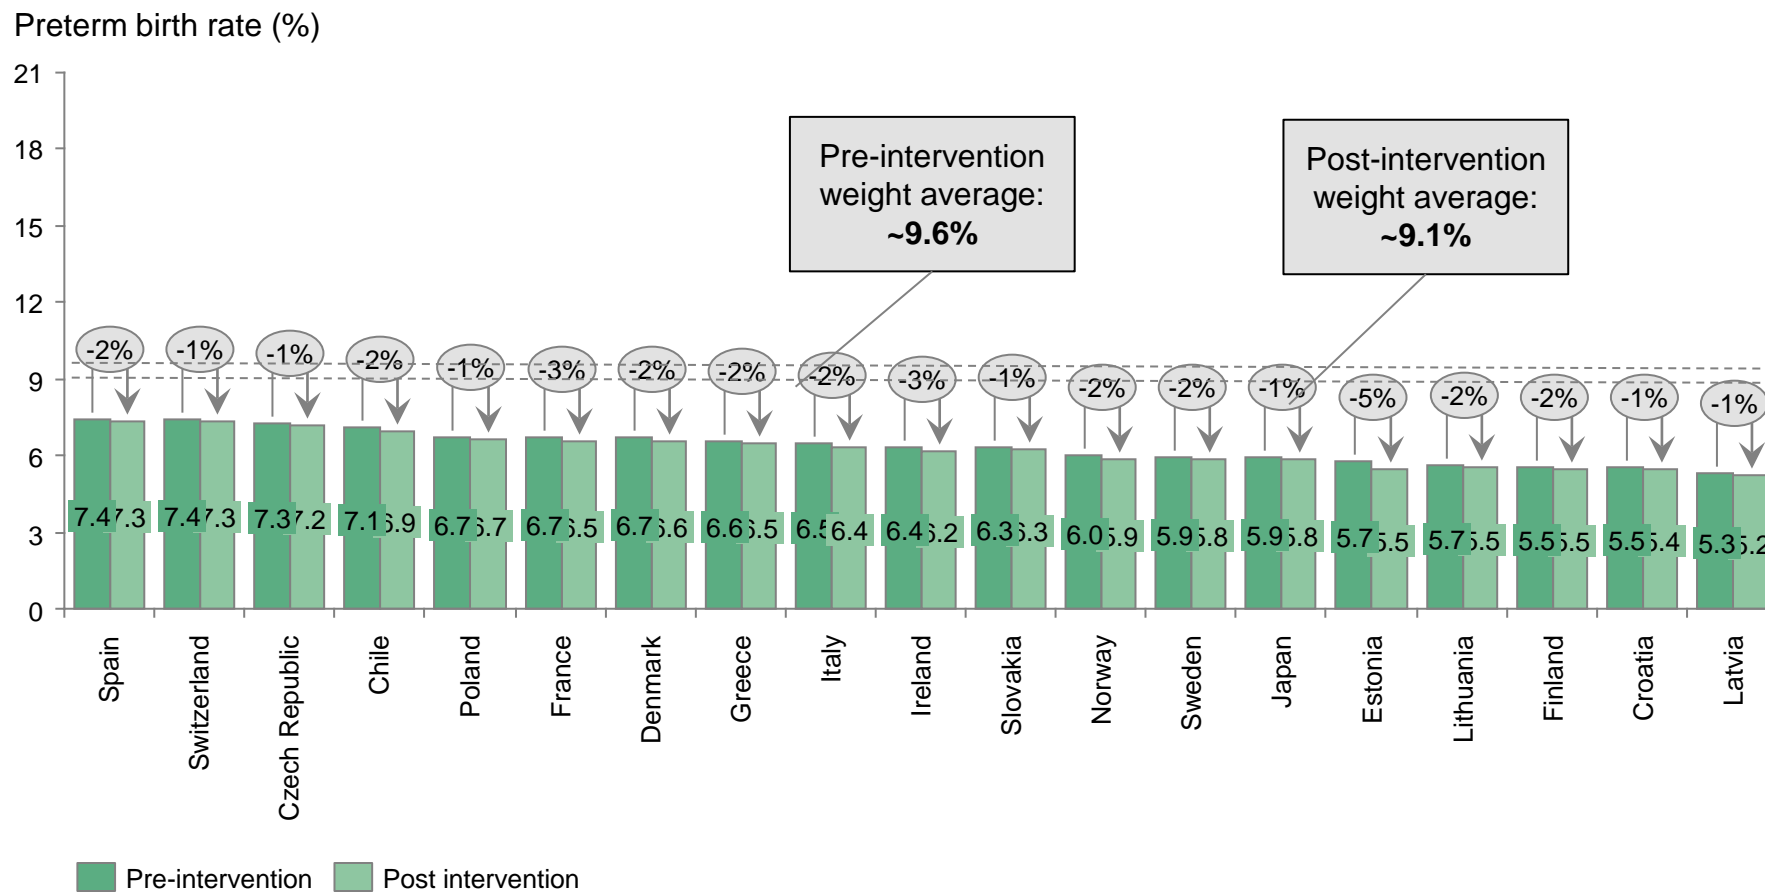

Webtable 26. Estimated number of preterm births before and after applying interventions for 39 VHHDI countries

Number of preterm births in thousands

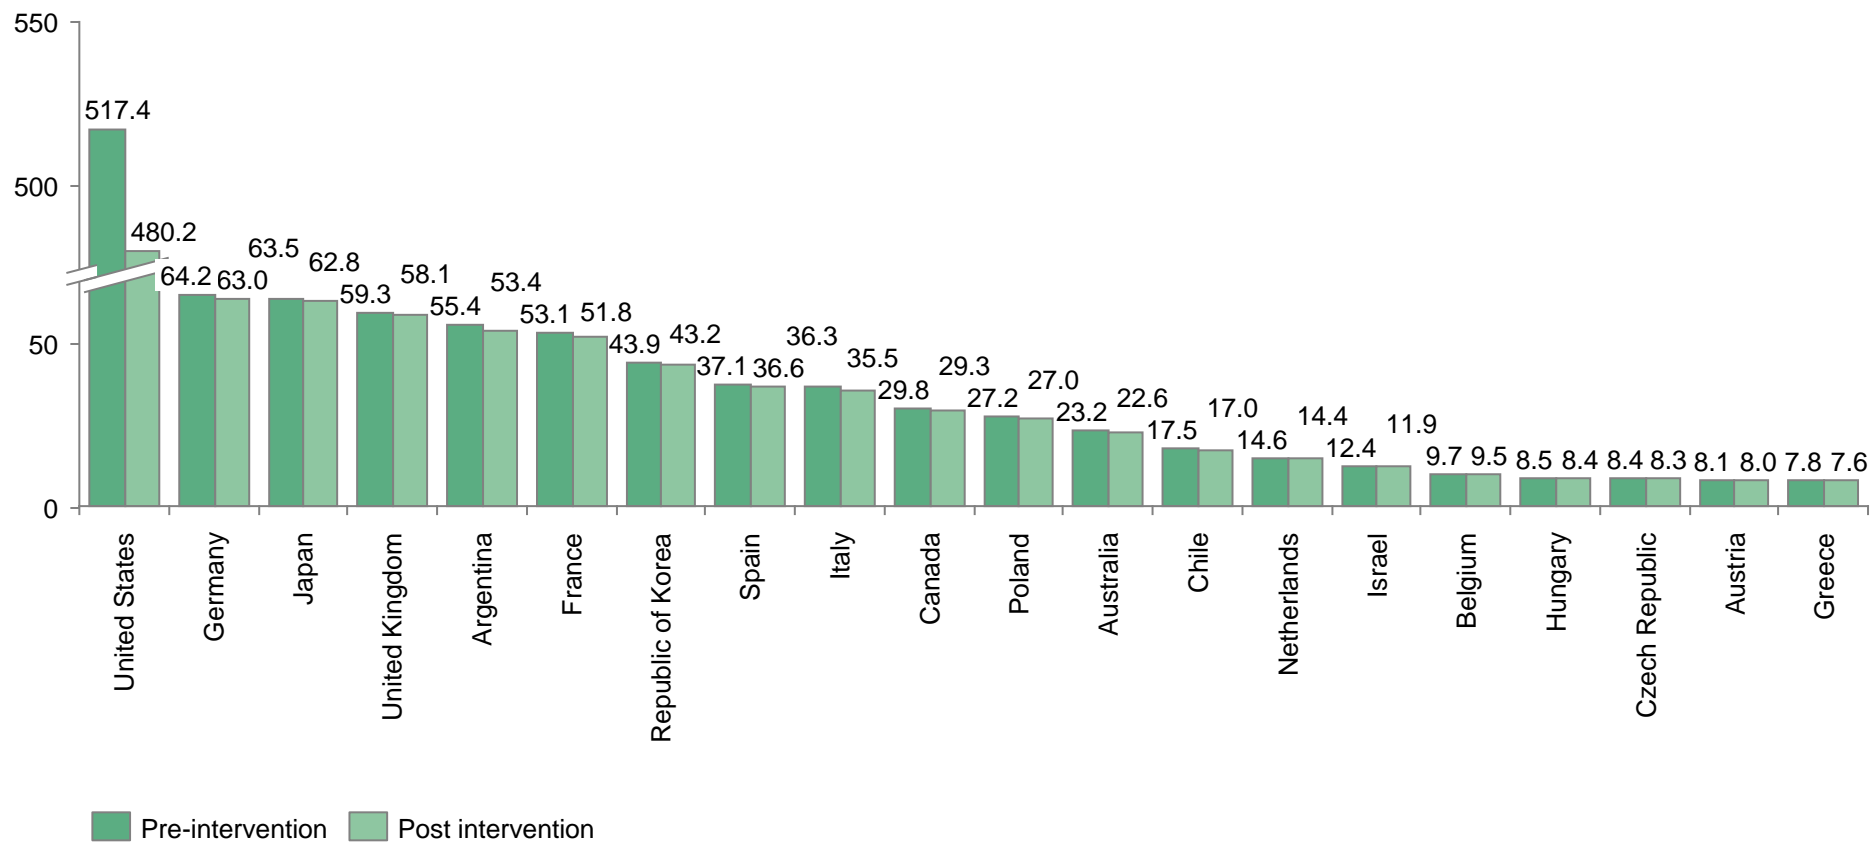



Webtable 26. Estimated number of preterm births before and after applying interventions for 39 VHHDI countries (continued)

Number of preterm births in thousands

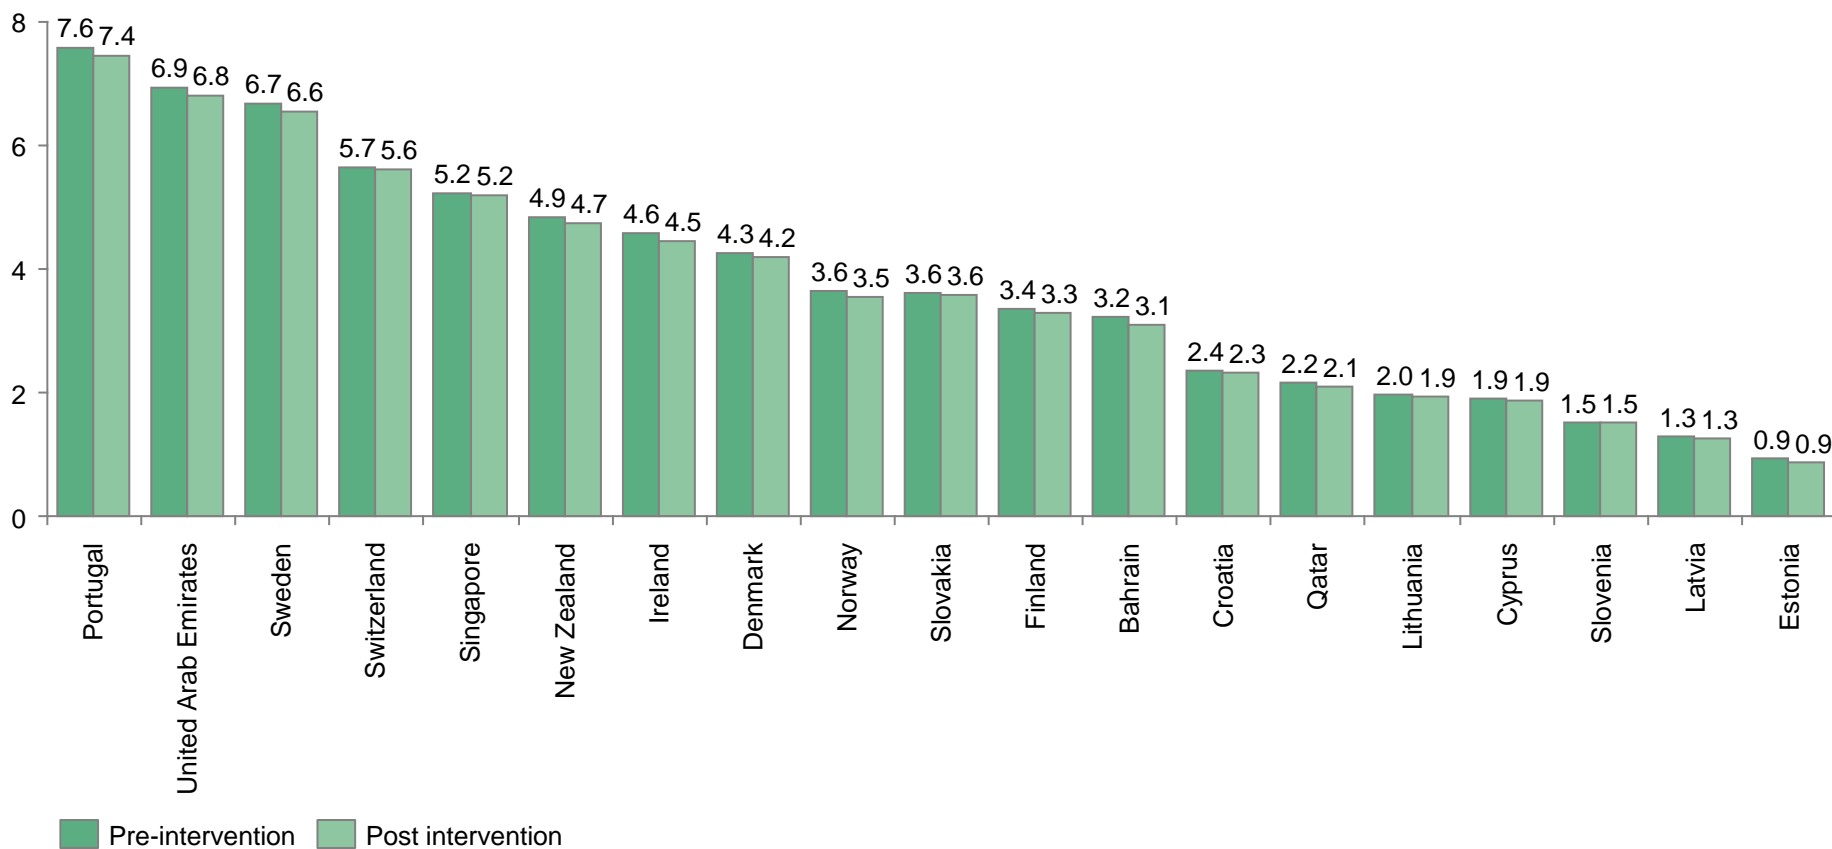

Webtable 27. Estimated reduction in preterm birth for 5 selected preventive interventions for 39 VHDI countries

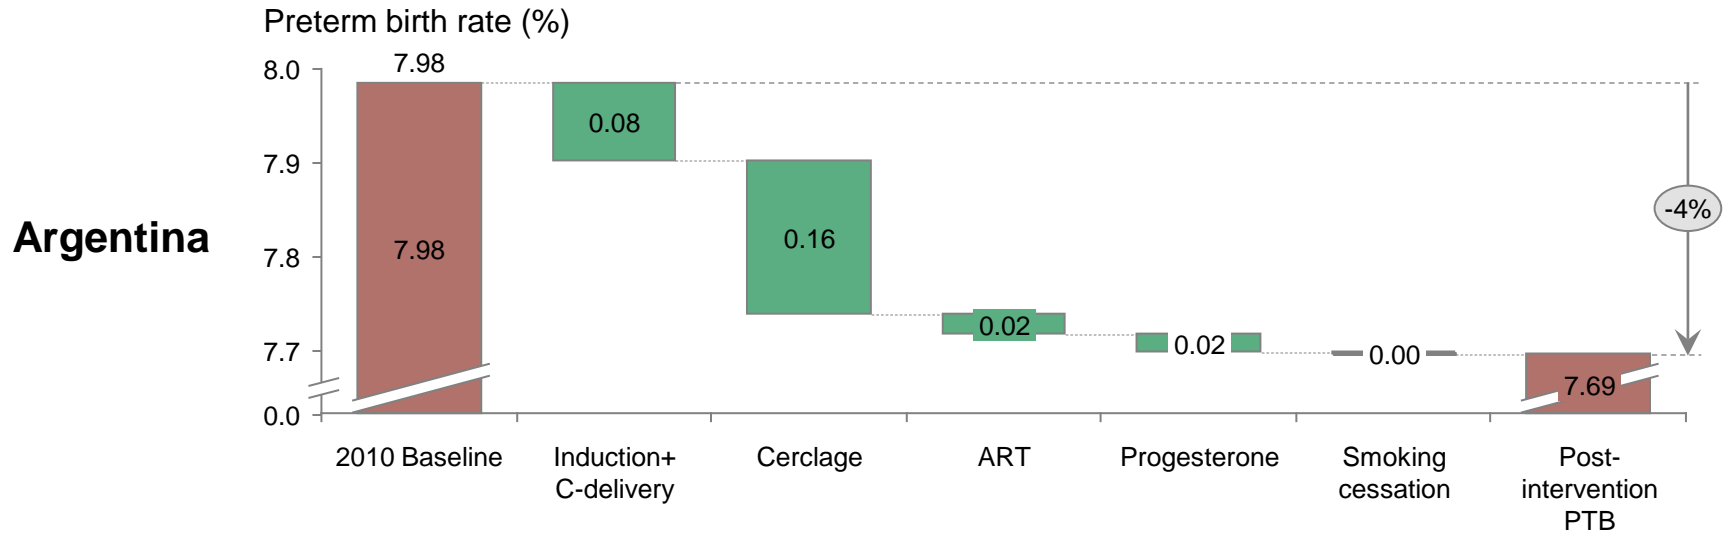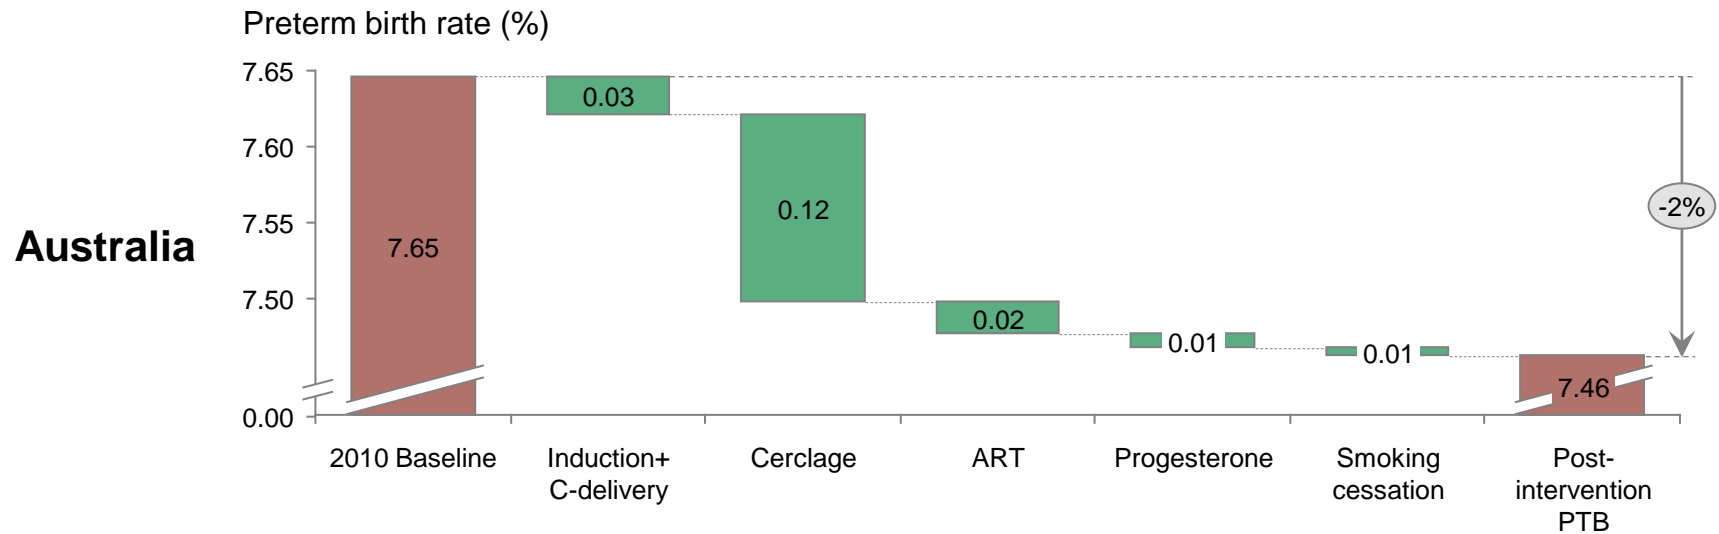

Webtable 27. Estimated reduction in preterm birth for 5 selected preventive interventions for 39 VHDI countries

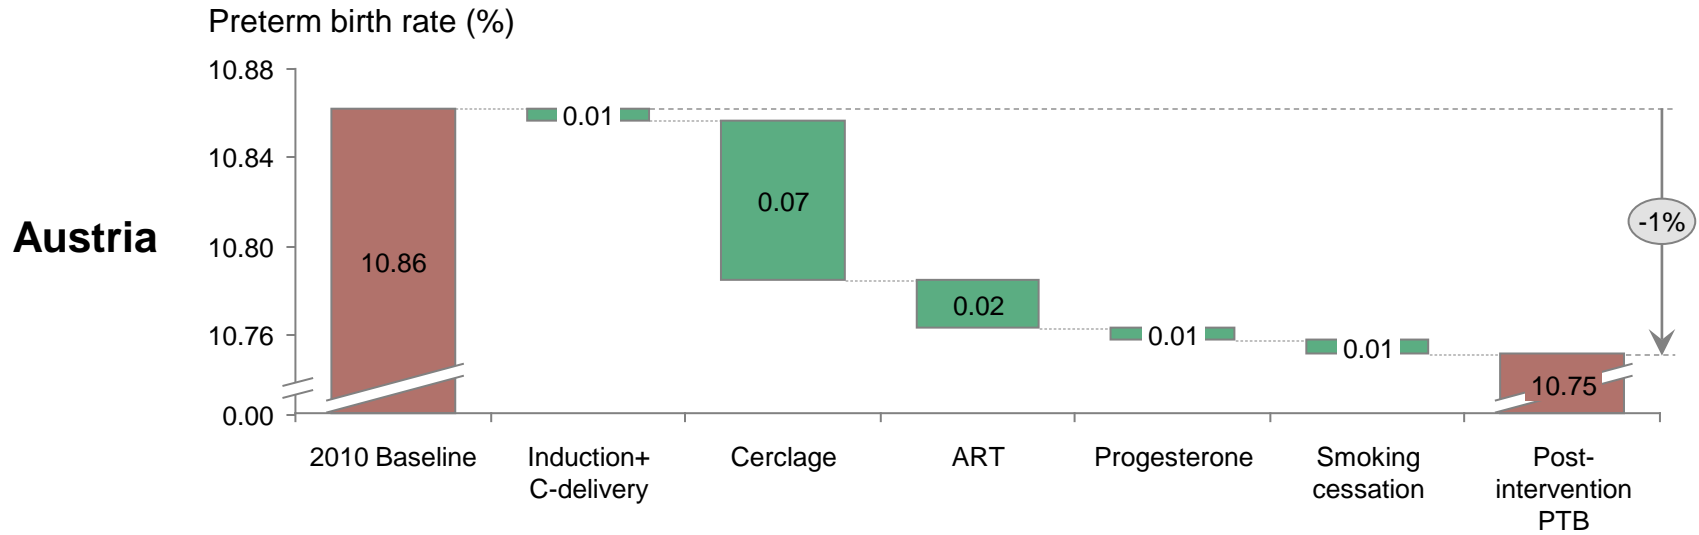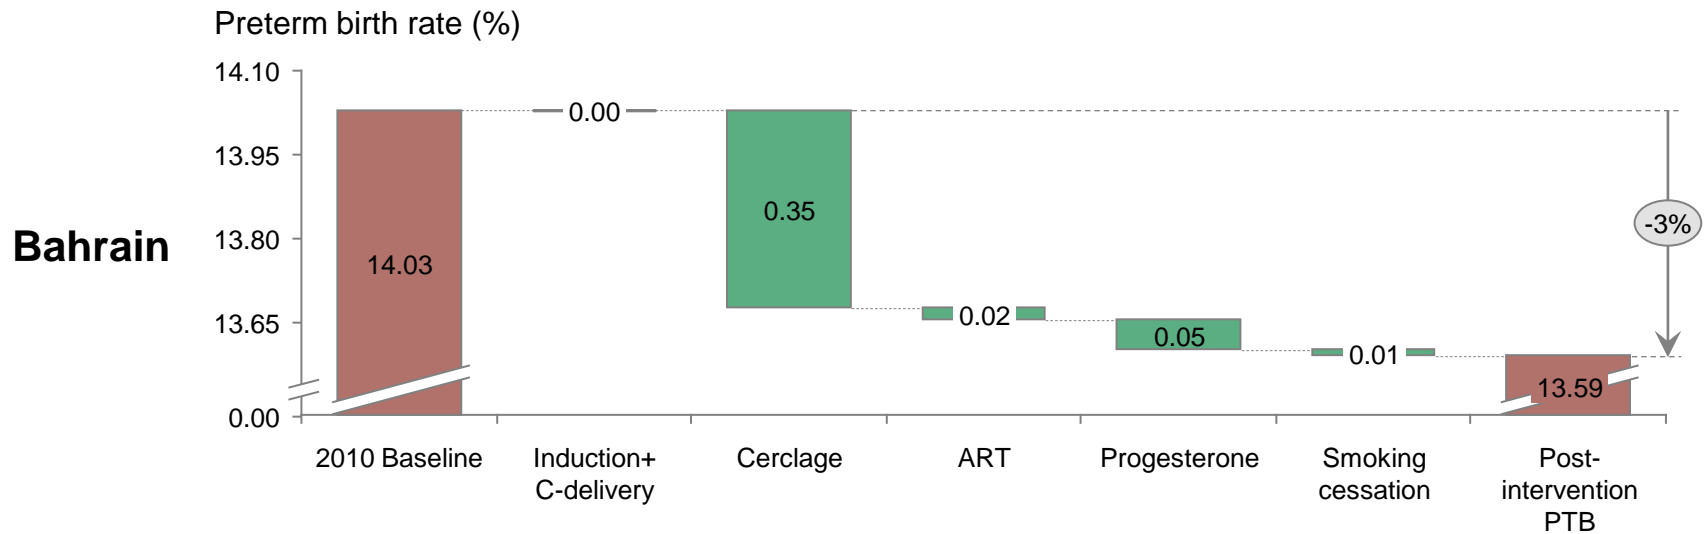

Webtable 27. Estimated reduction in preterm birth for 5 selected preventive interventions for 39 VHDI countries

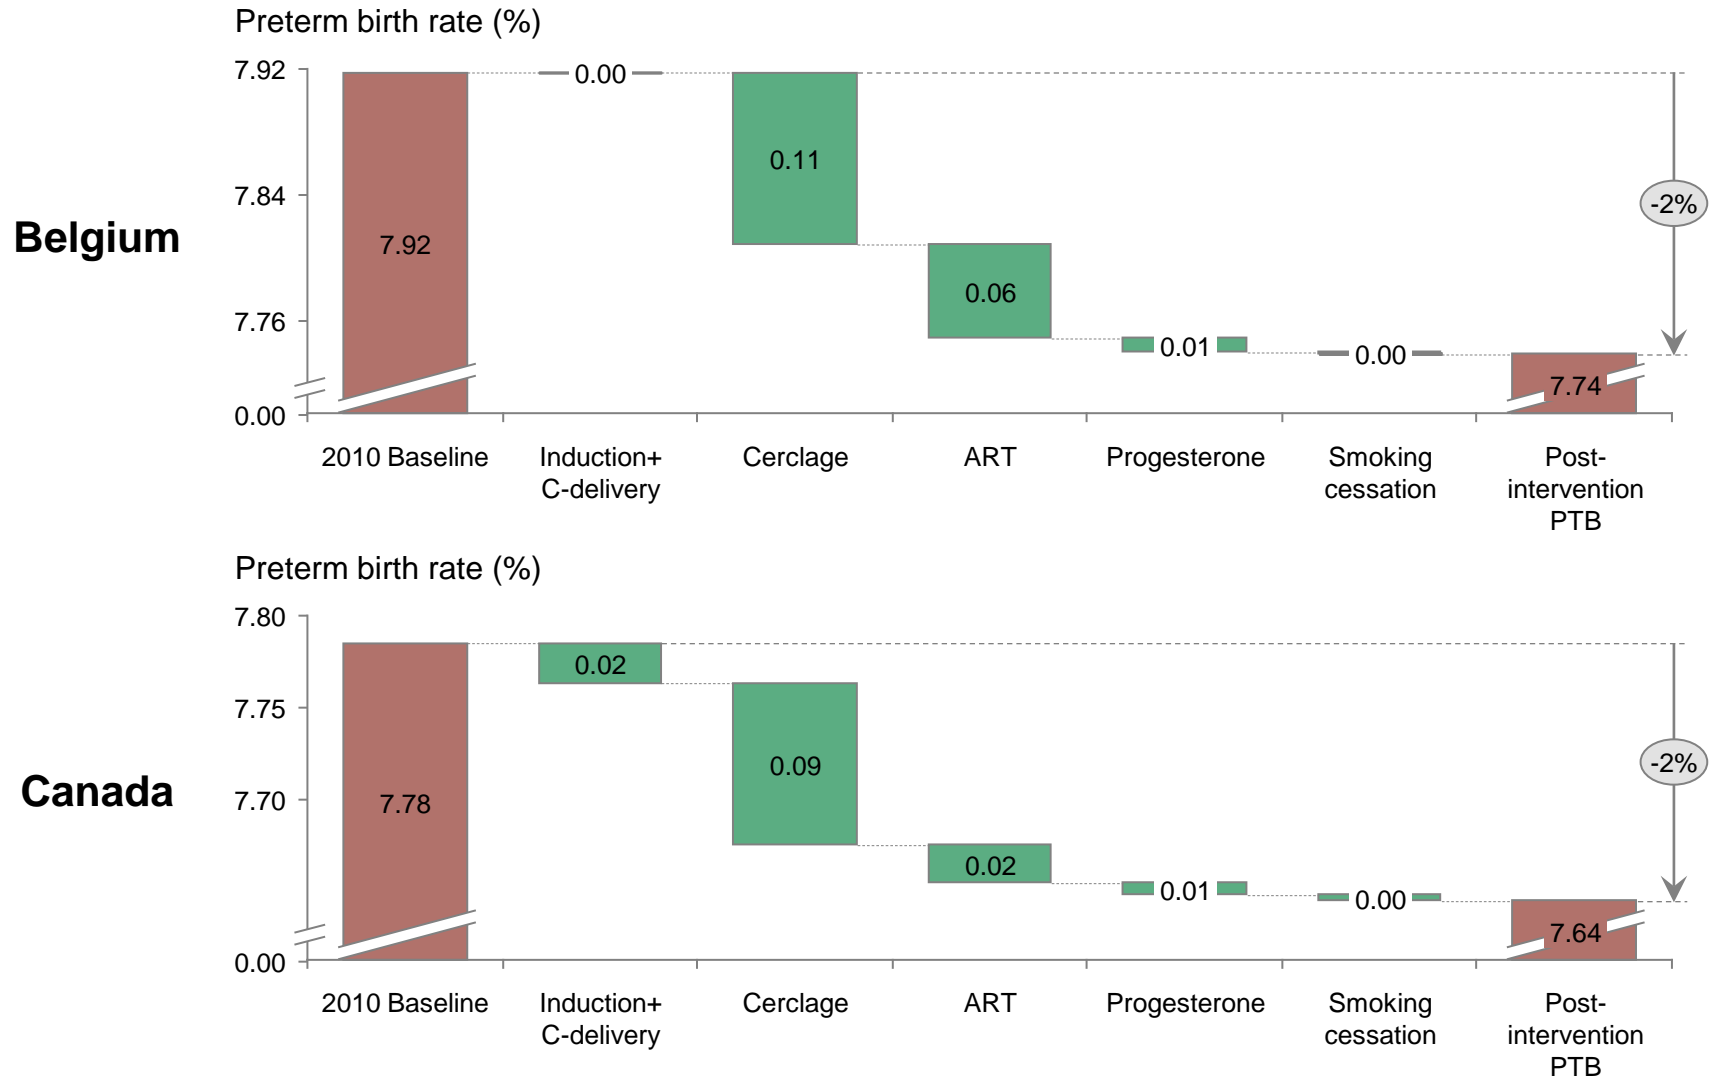

Webtable 27. Estimated reduction in preterm birth for 5 selected preventive interventions for 39 VHDI countries

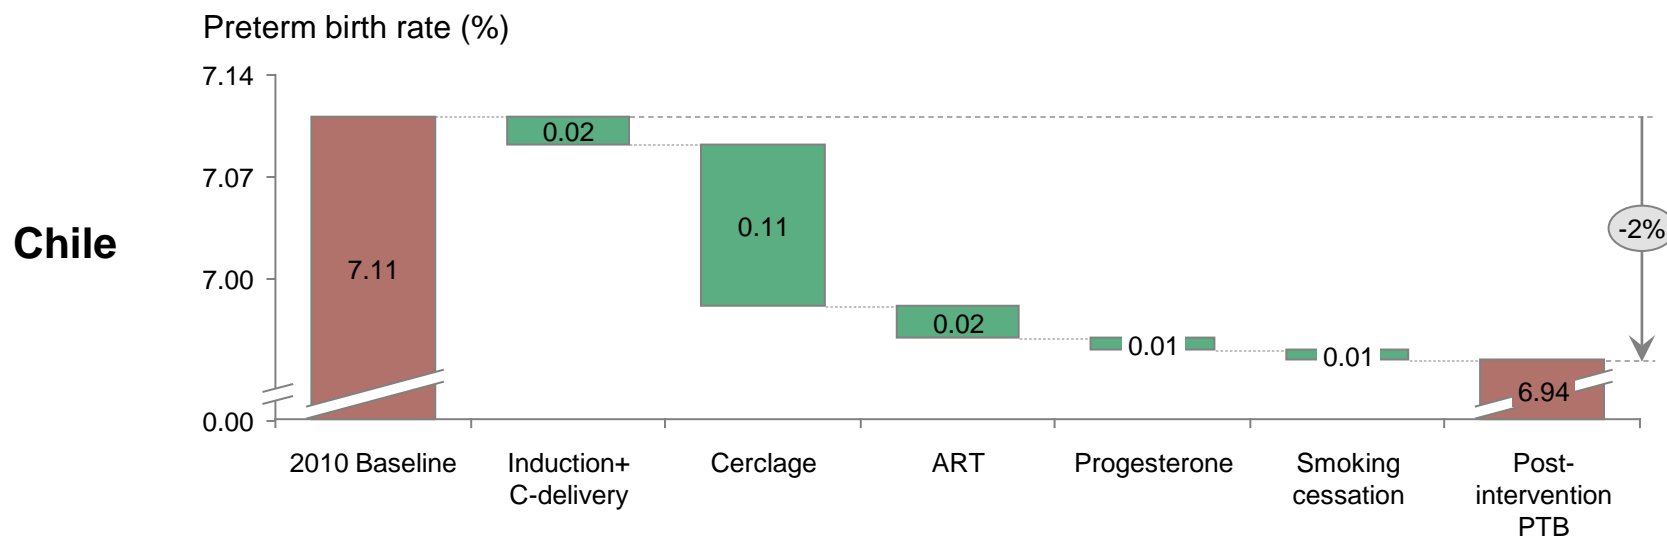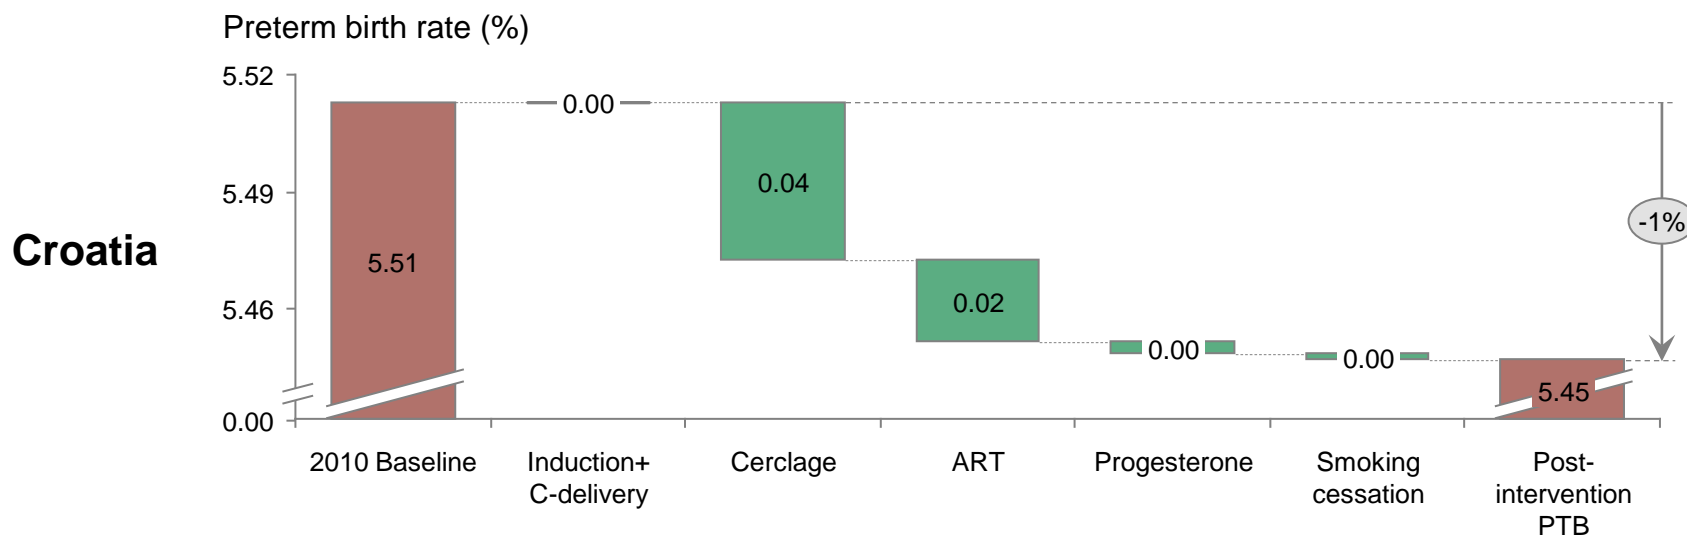

Webtable 27. Estimated reduction in preterm birth for 5 selected preventive interventions for 39 VHDI countries

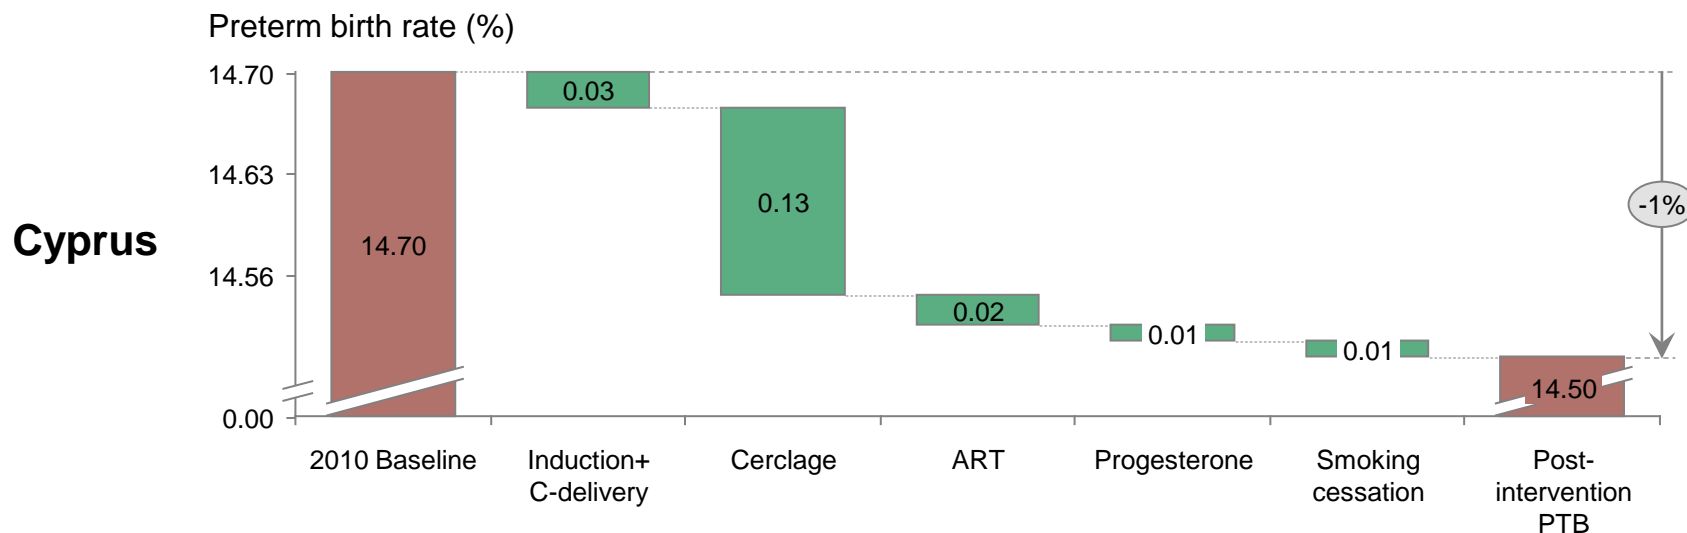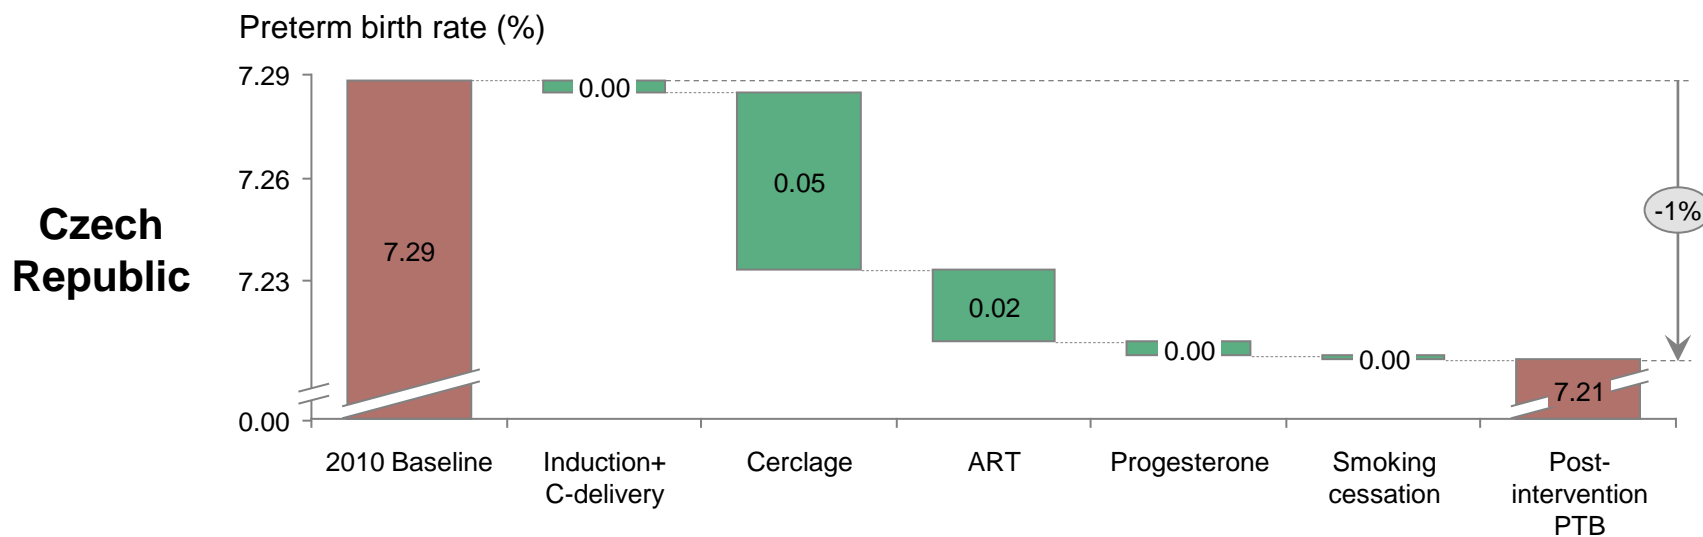

Webtable 27. Estimated reduction in preterm birth for 5 selected preventive interventions for 39 VHDI countries

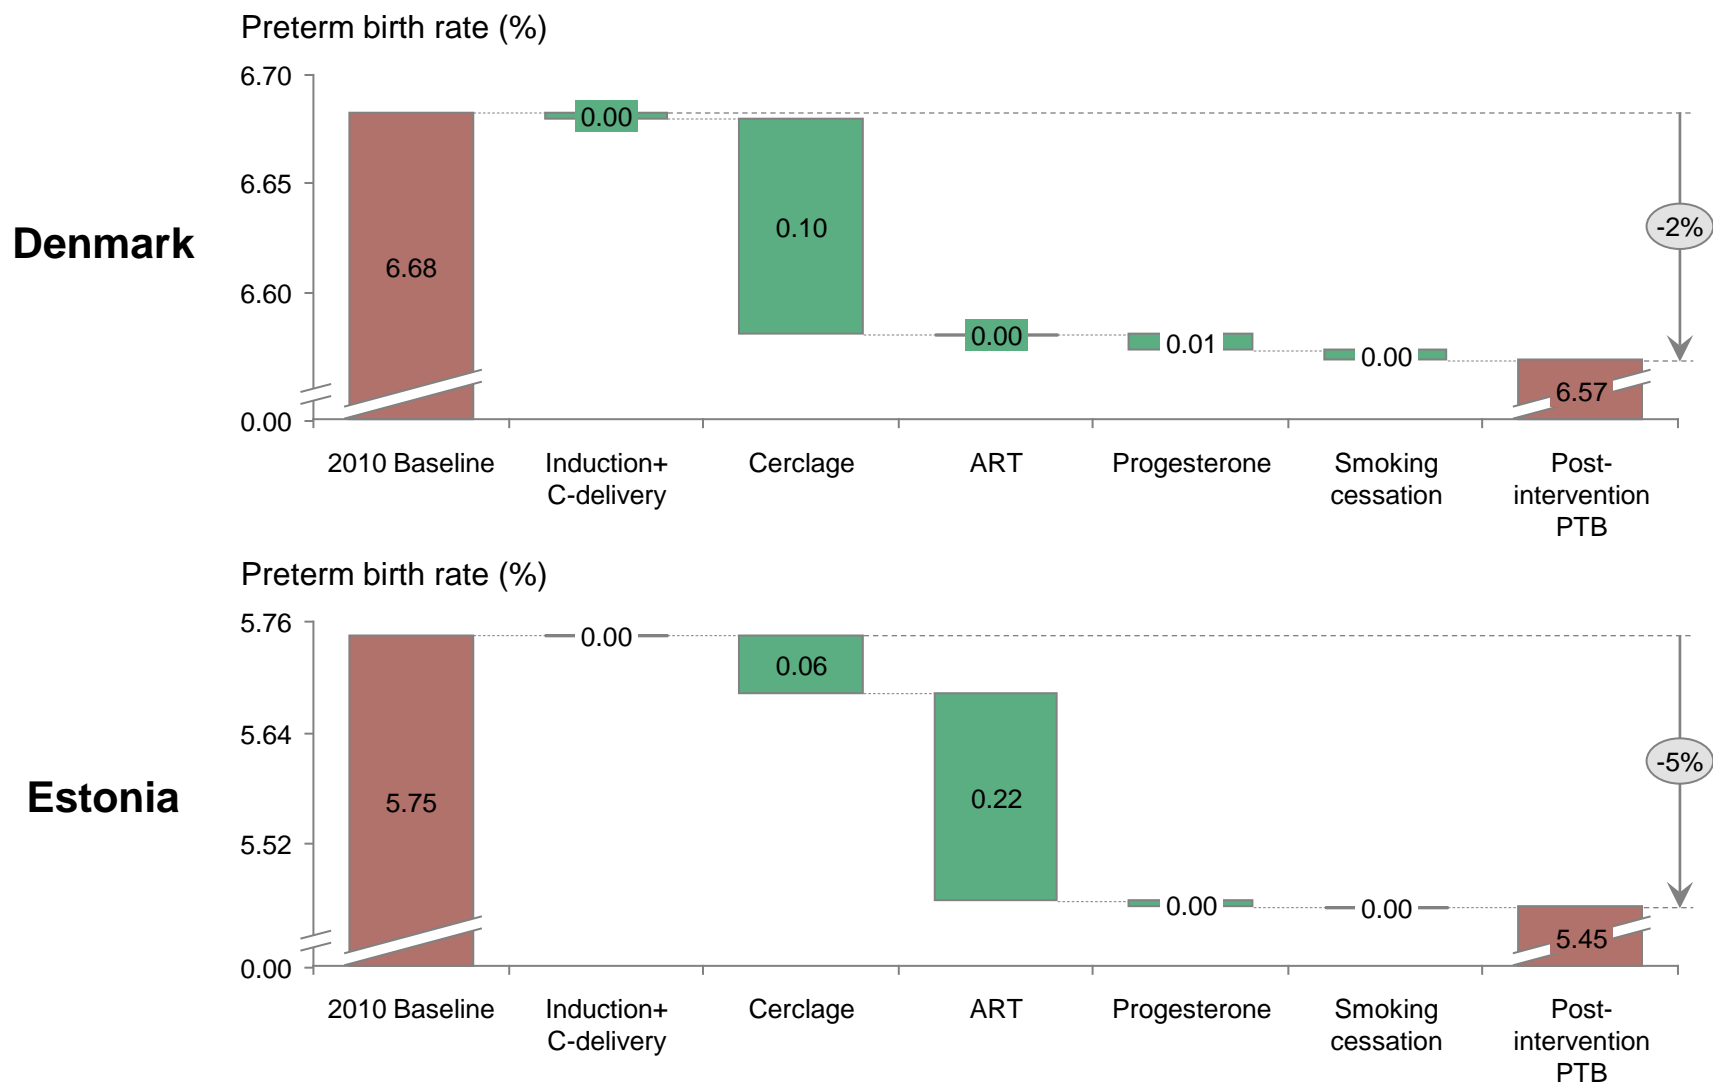

Webtable 27. Estimated reduction in preterm birth for 5 selected preventive interventions for 39 VHDI countries

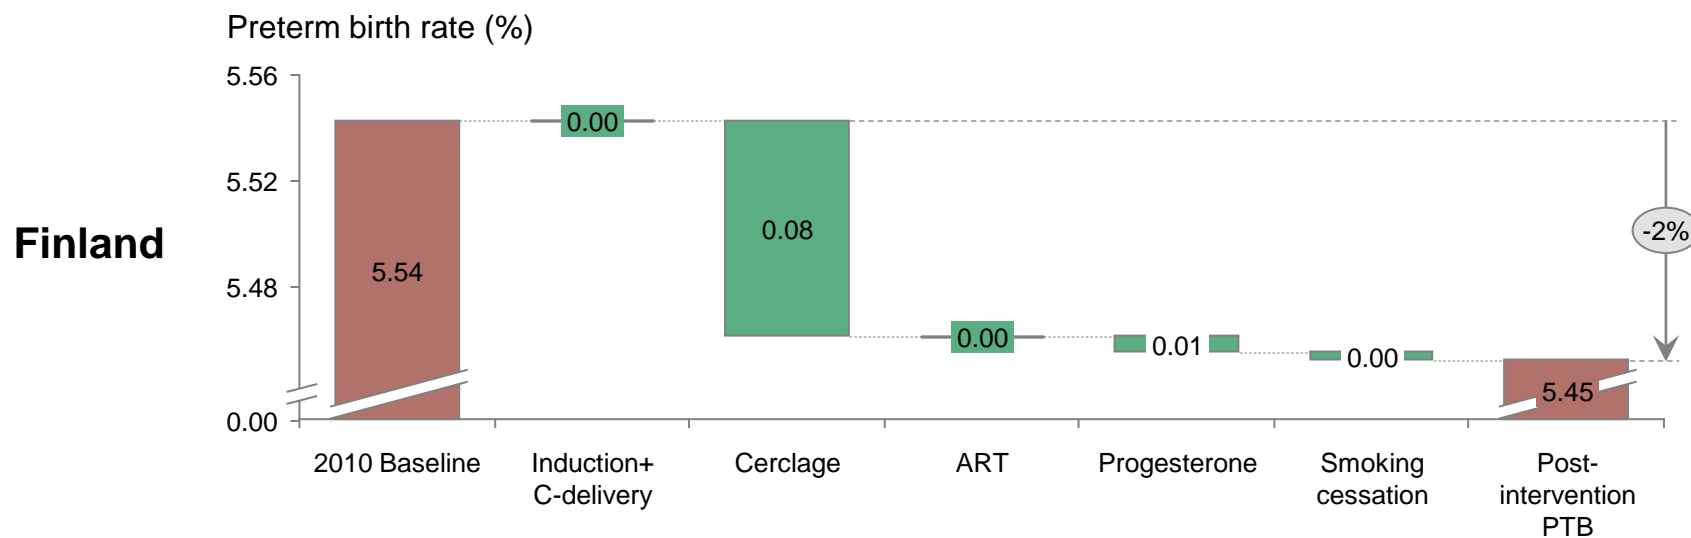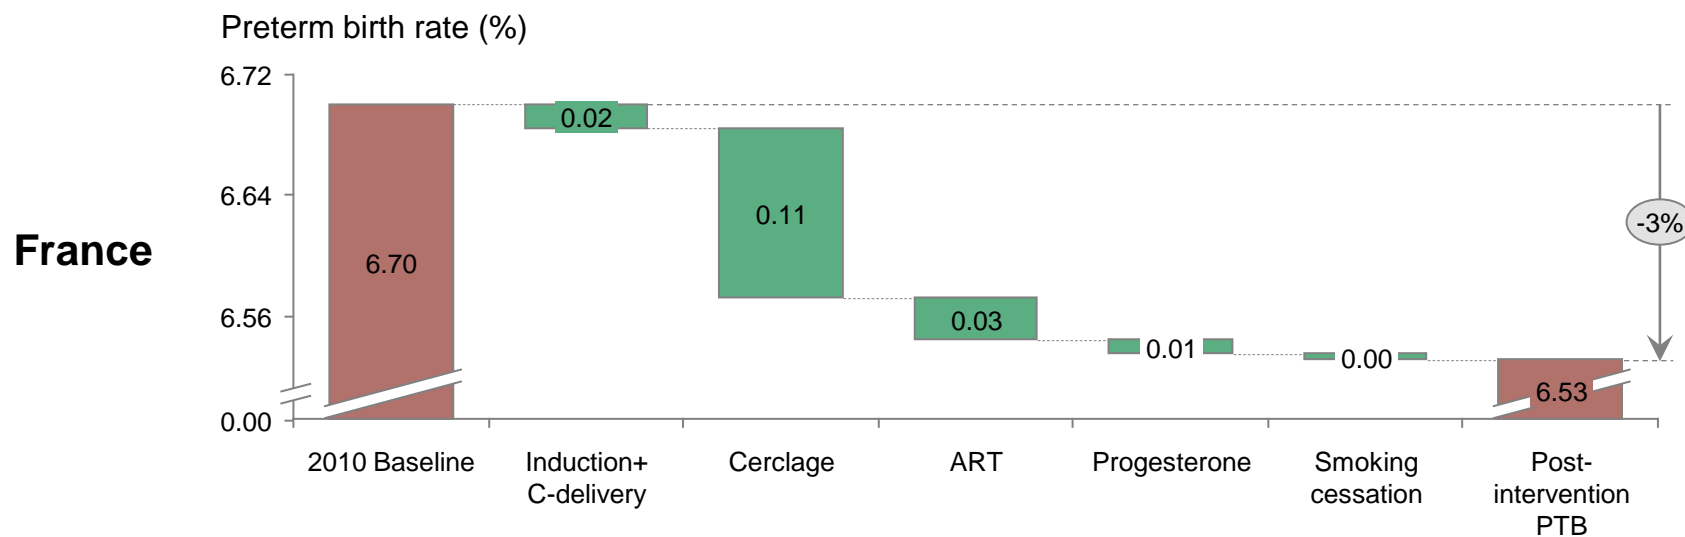



Webtable 27. Estimated reduction in preterm birth for 5 selected preventive interventions for 39 VHDI countries

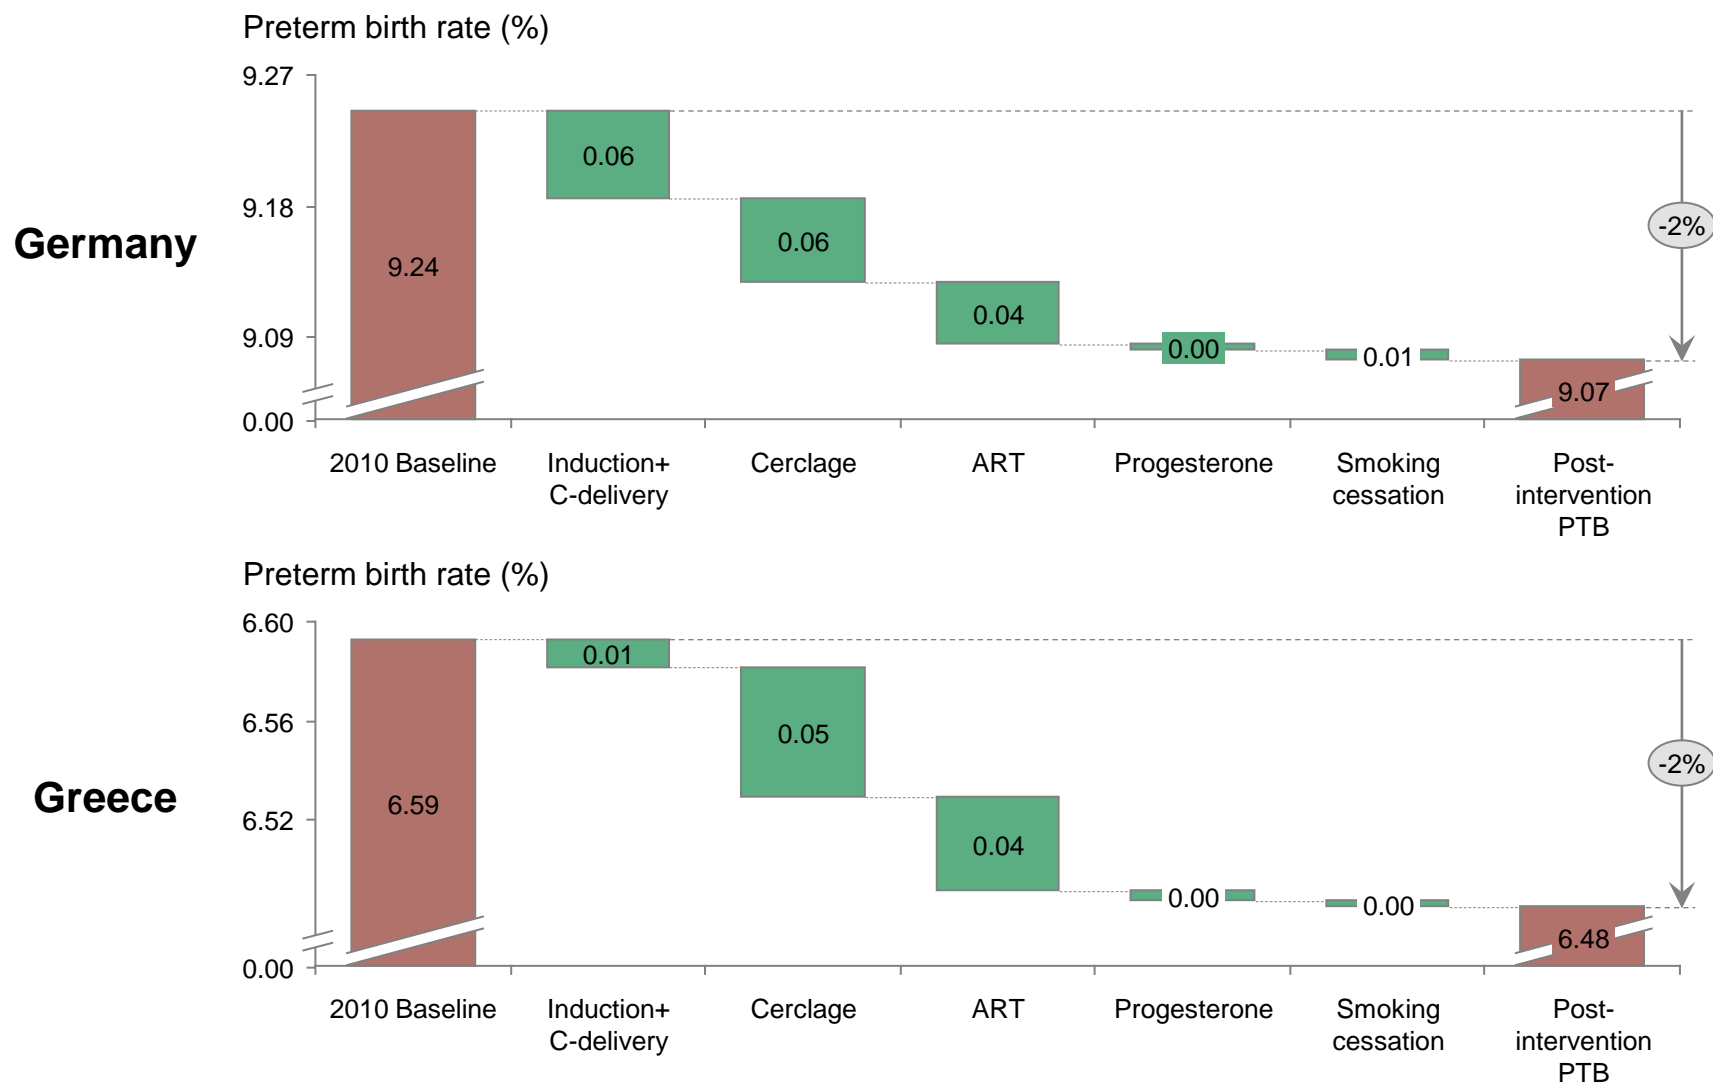

Webtable 27. Estimated reduction in preterm birth for 5 selected preventive interventions for 39 VHDI countries

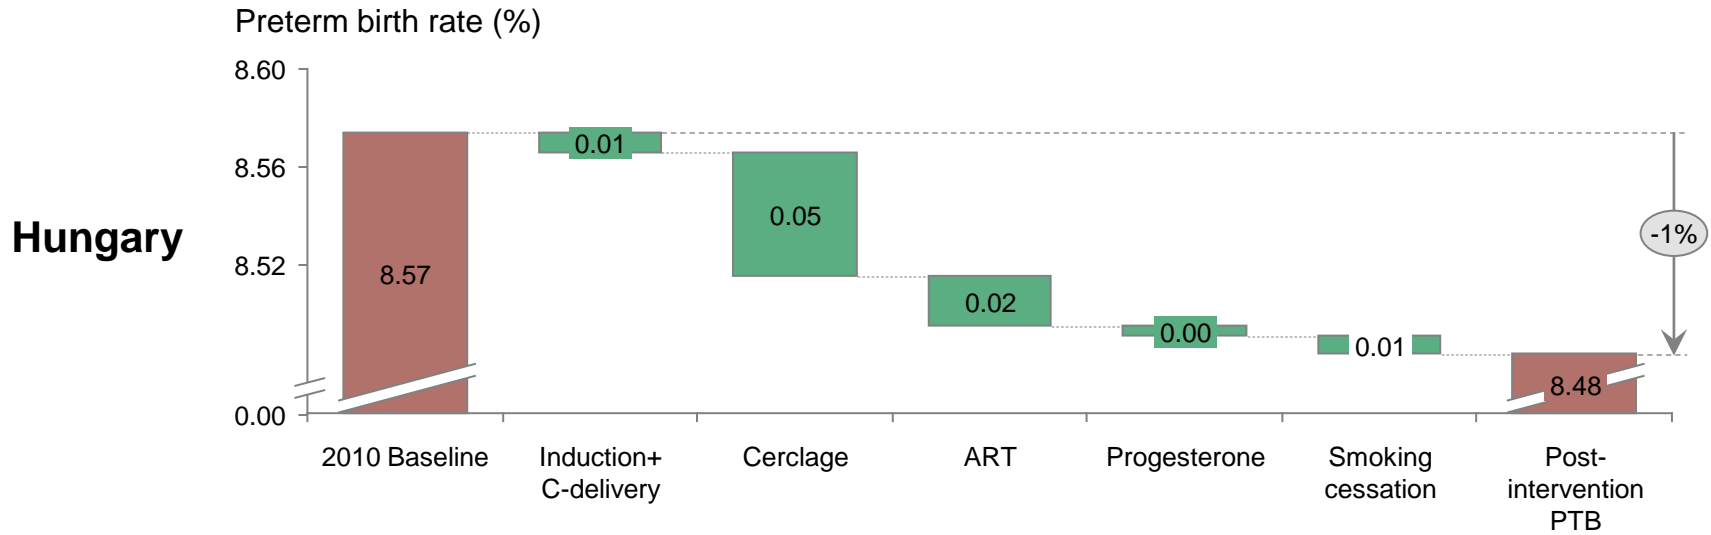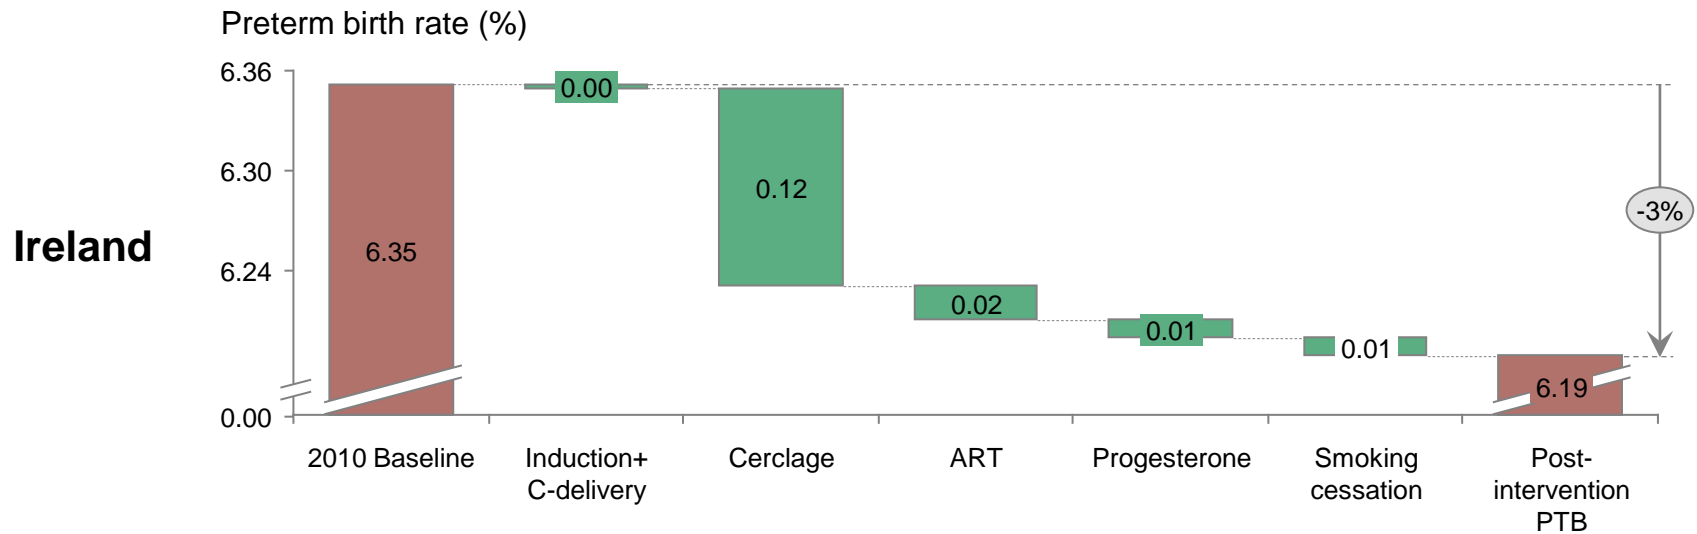

Webtable 27. Estimated reduction in preterm birth for 5 selected preventive interventions for 39 VHDI countries

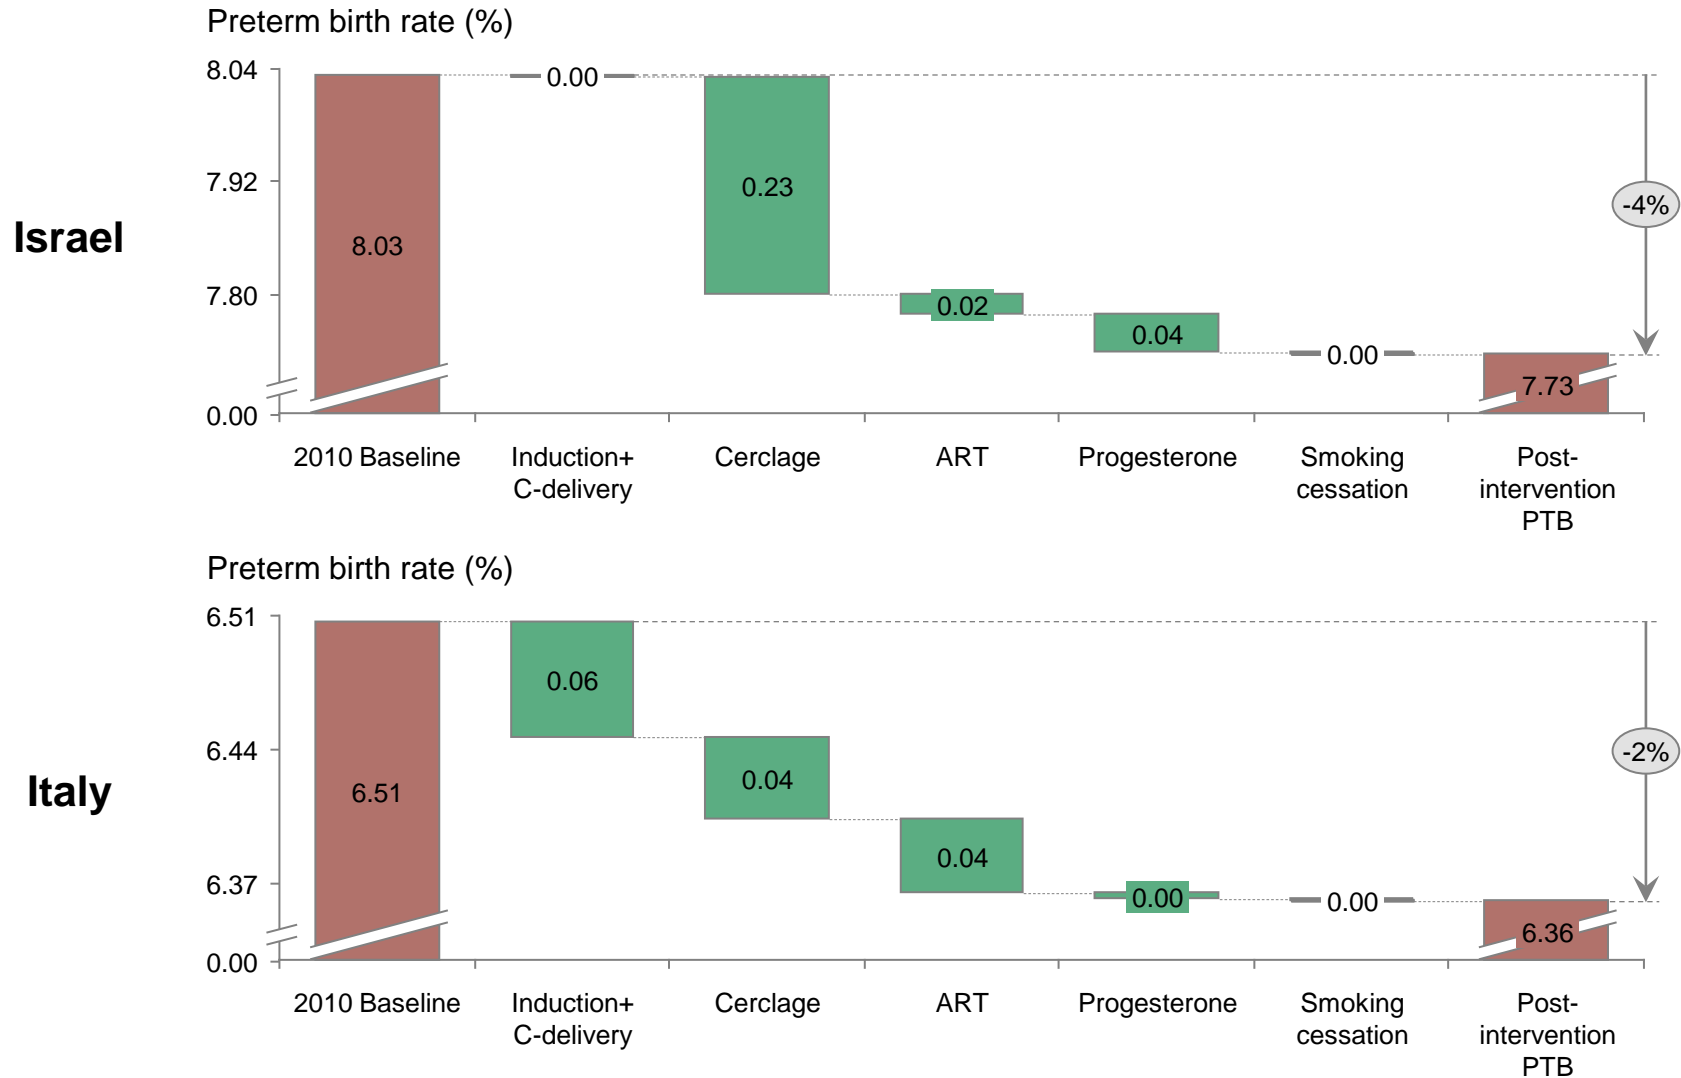

Webtable 27. Estimated reduction in preterm birth for 5 selected preventive interventions for 39 VHDI countries

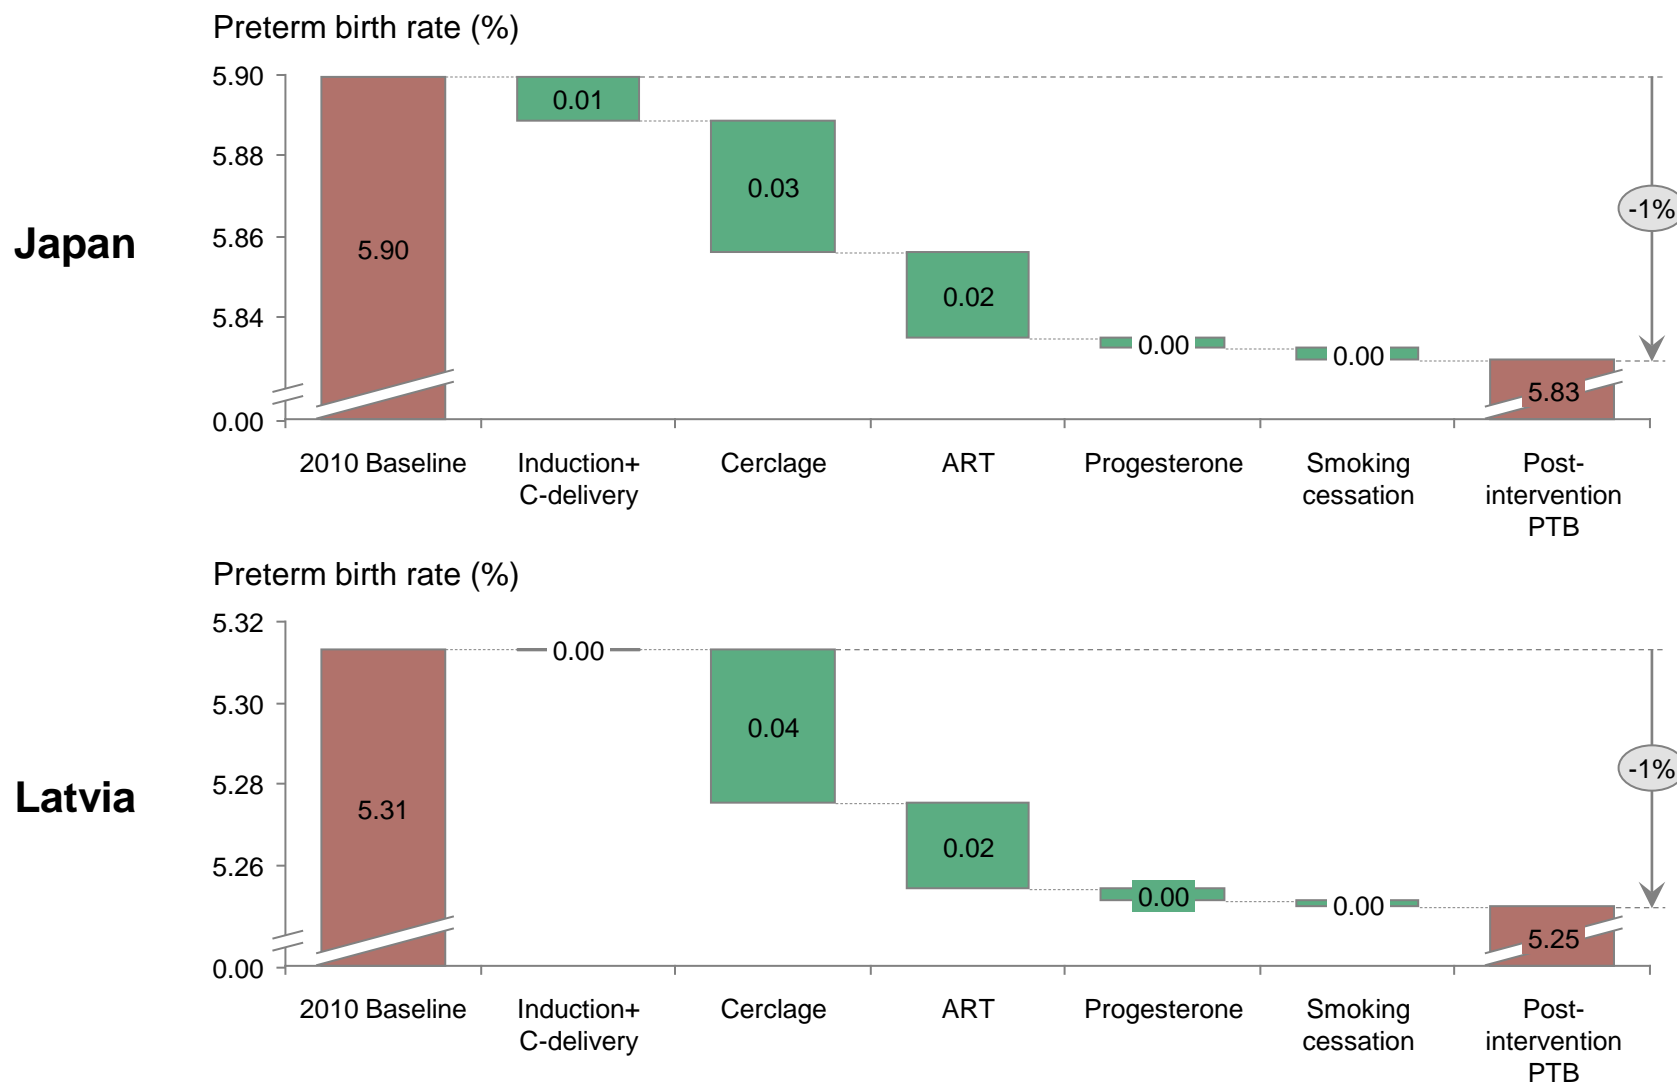

Webtable 27. Estimated reduction in preterm birth for 5 selected preventive interventions for 39 VHDI countries

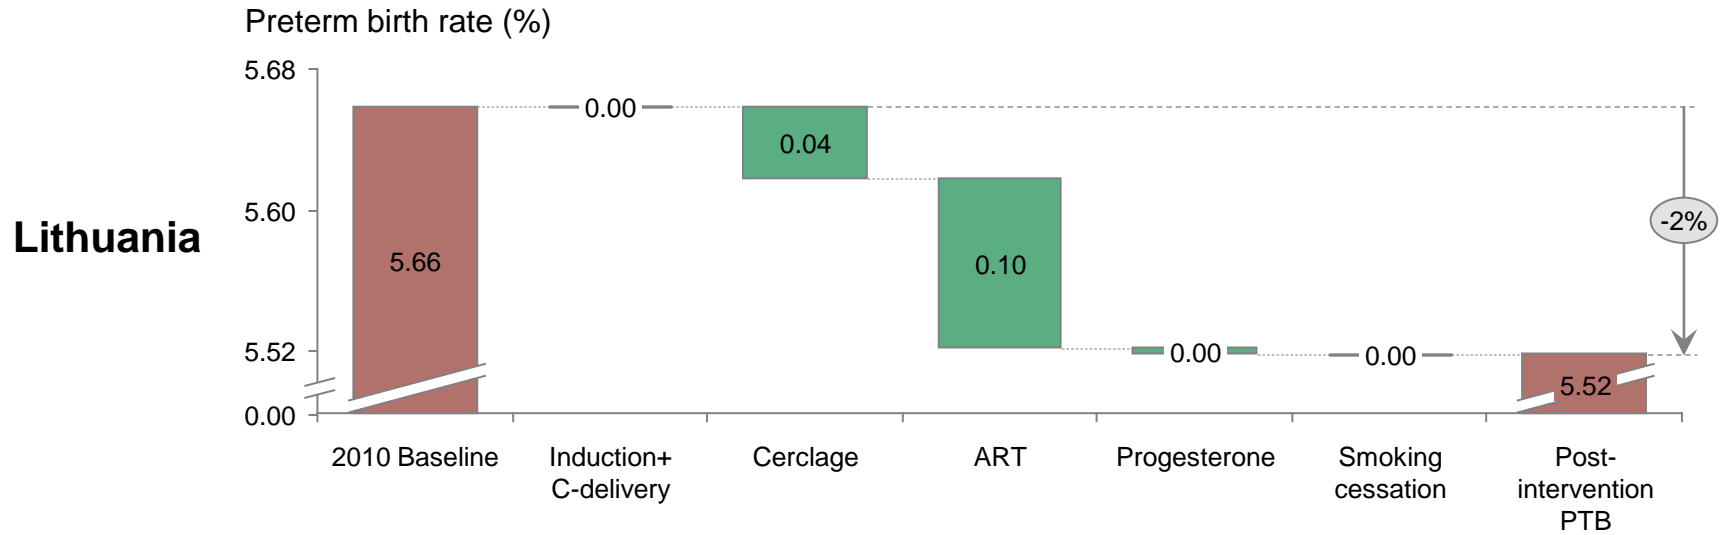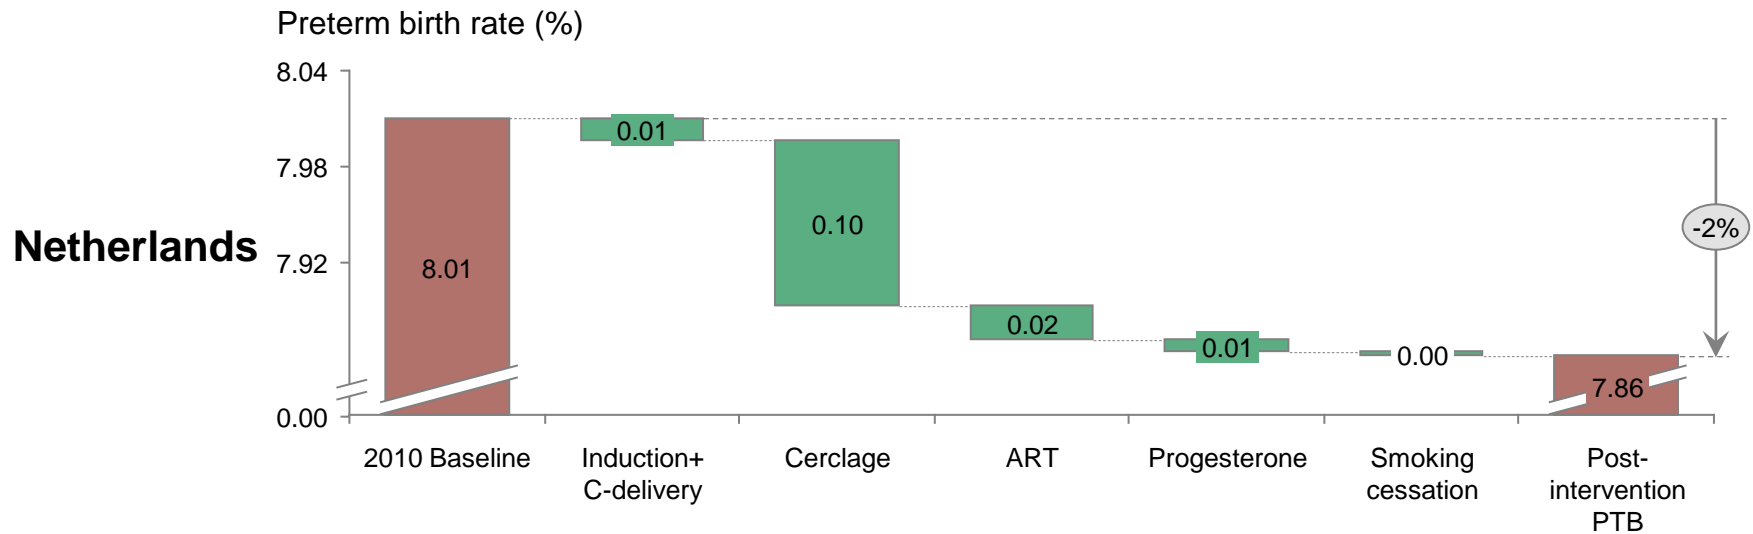

Webtable 27. Estimated reduction in preterm birth for 5 selected preventive interventions for 39 VHDI countries

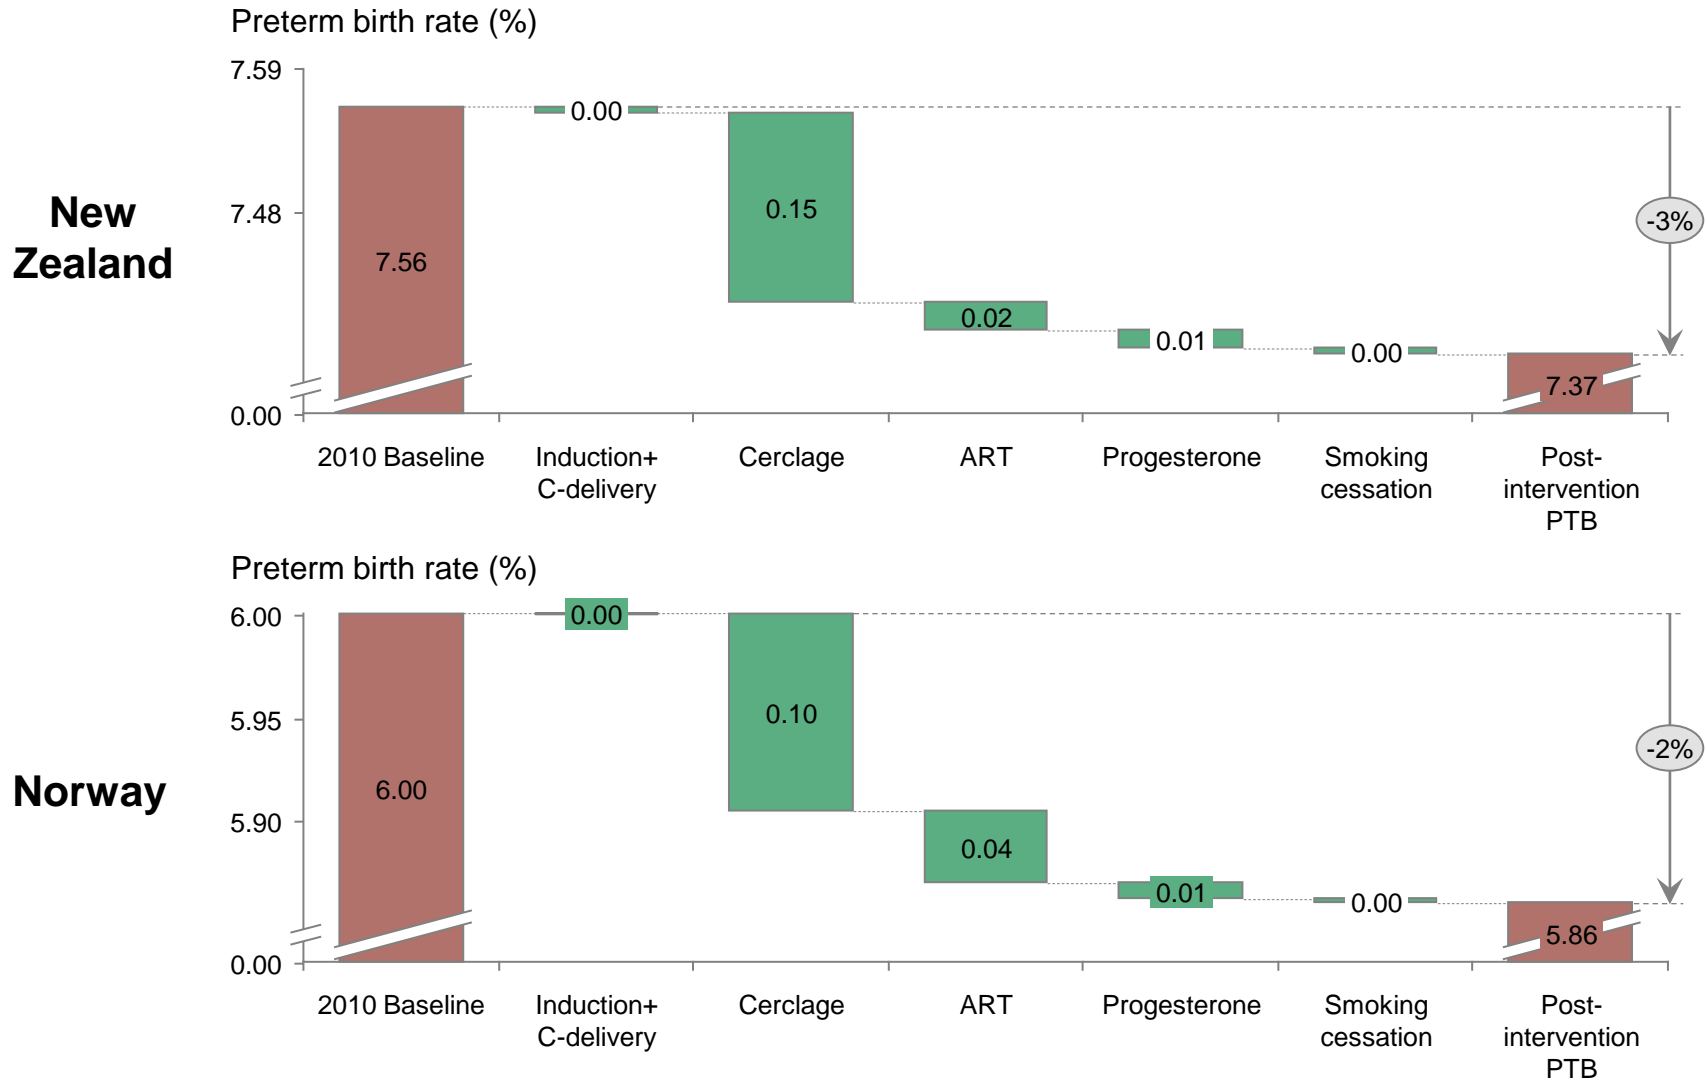

Webtable 27. Estimated reduction in preterm birth for 5 selected preventive interventions for 39 VHDI countries

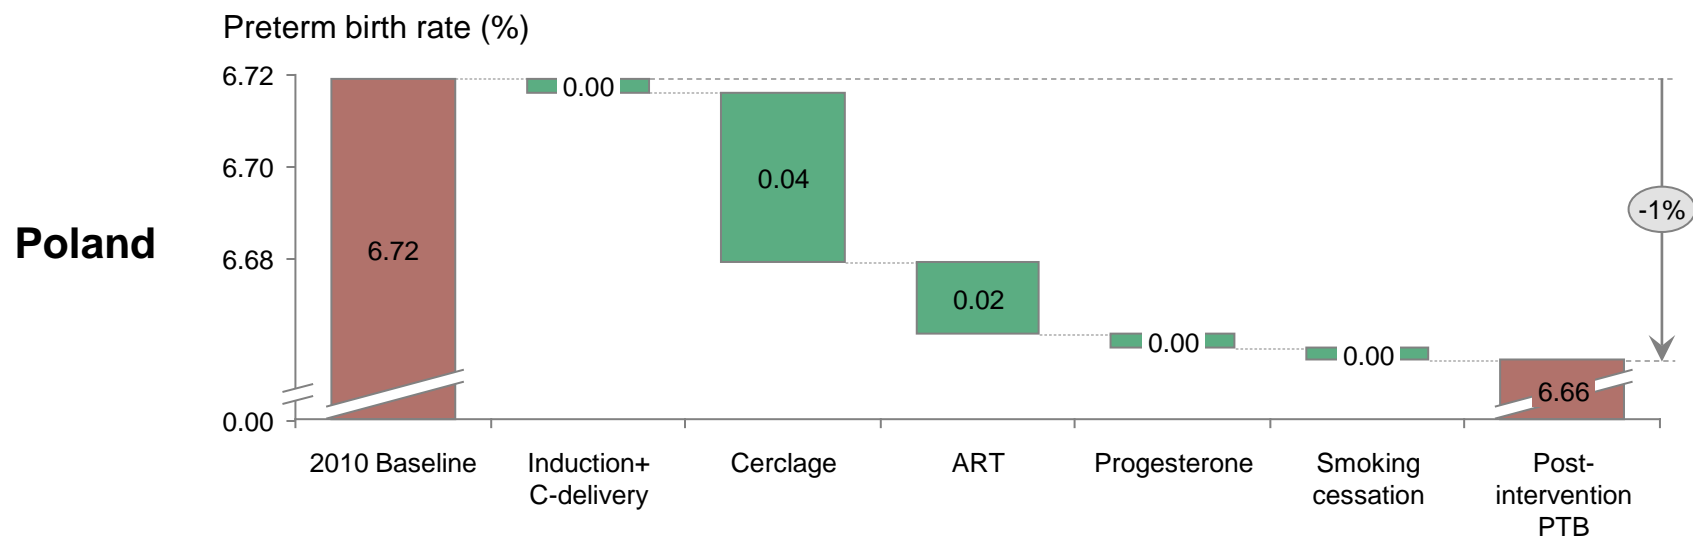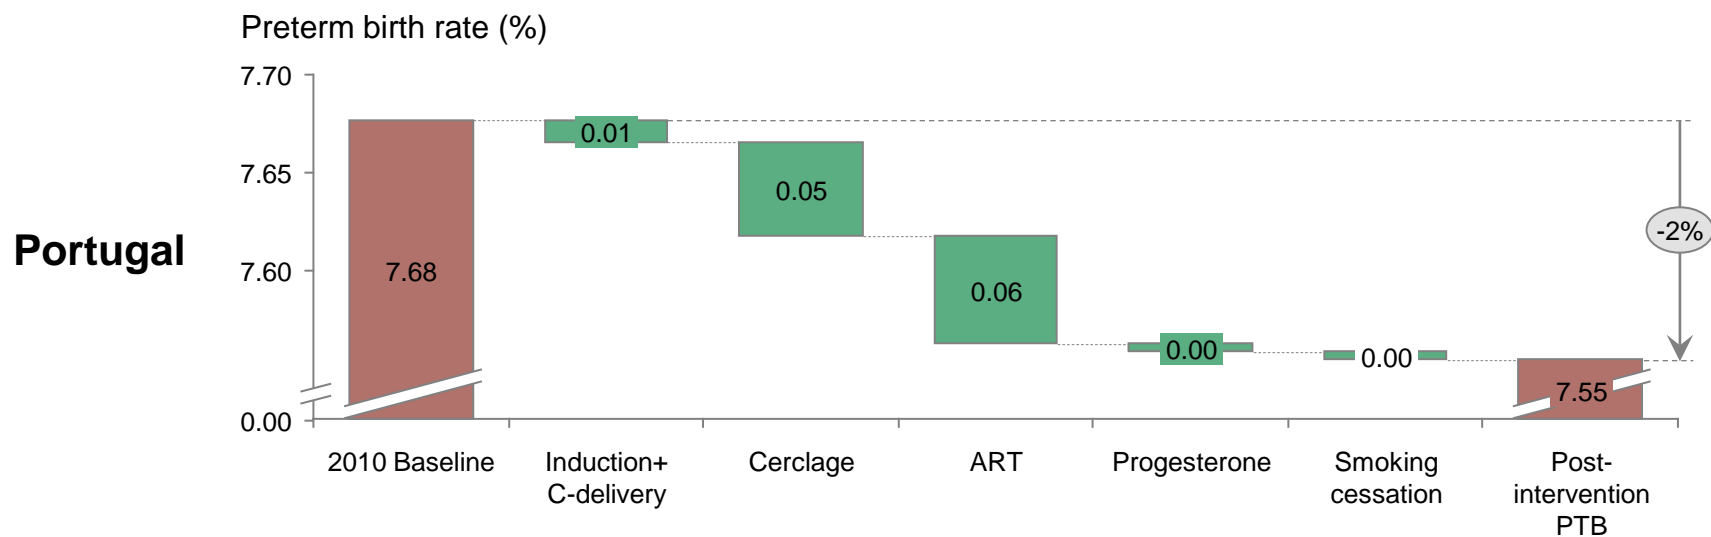

Webtable 27. Estimated reduction in preterm birth for 5 selected preventive interventions for 39 VHDI countries

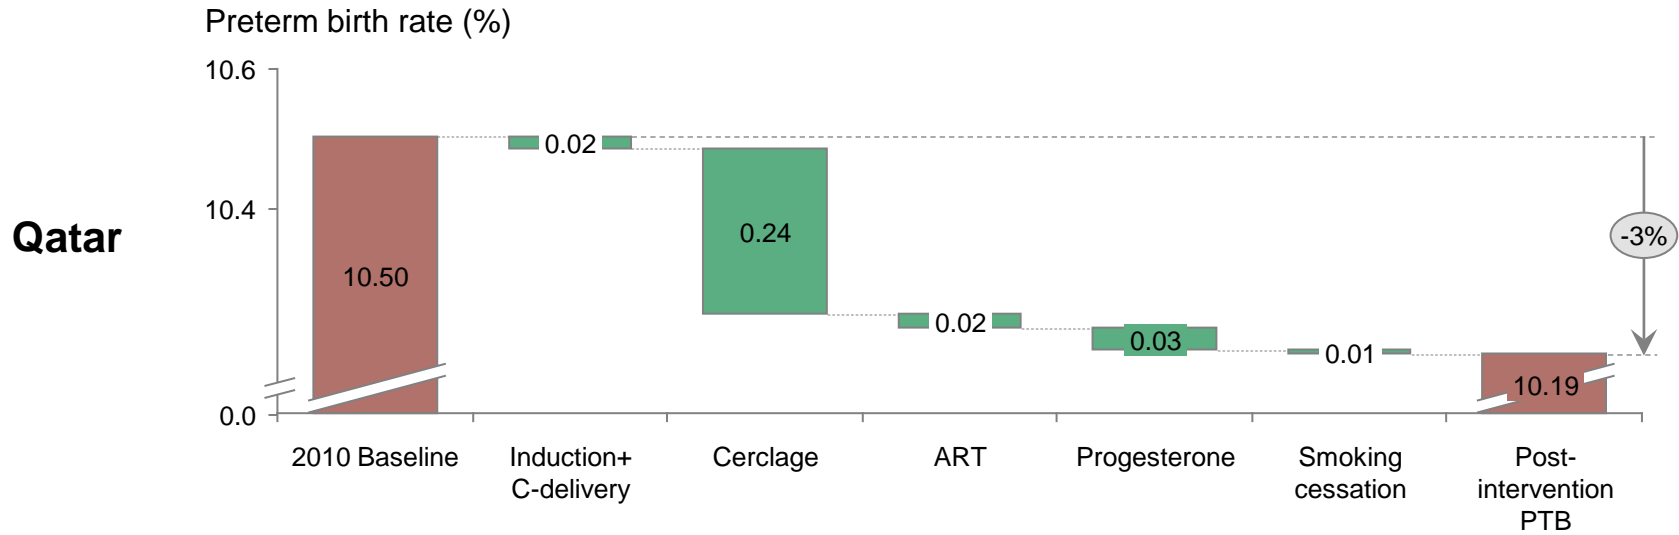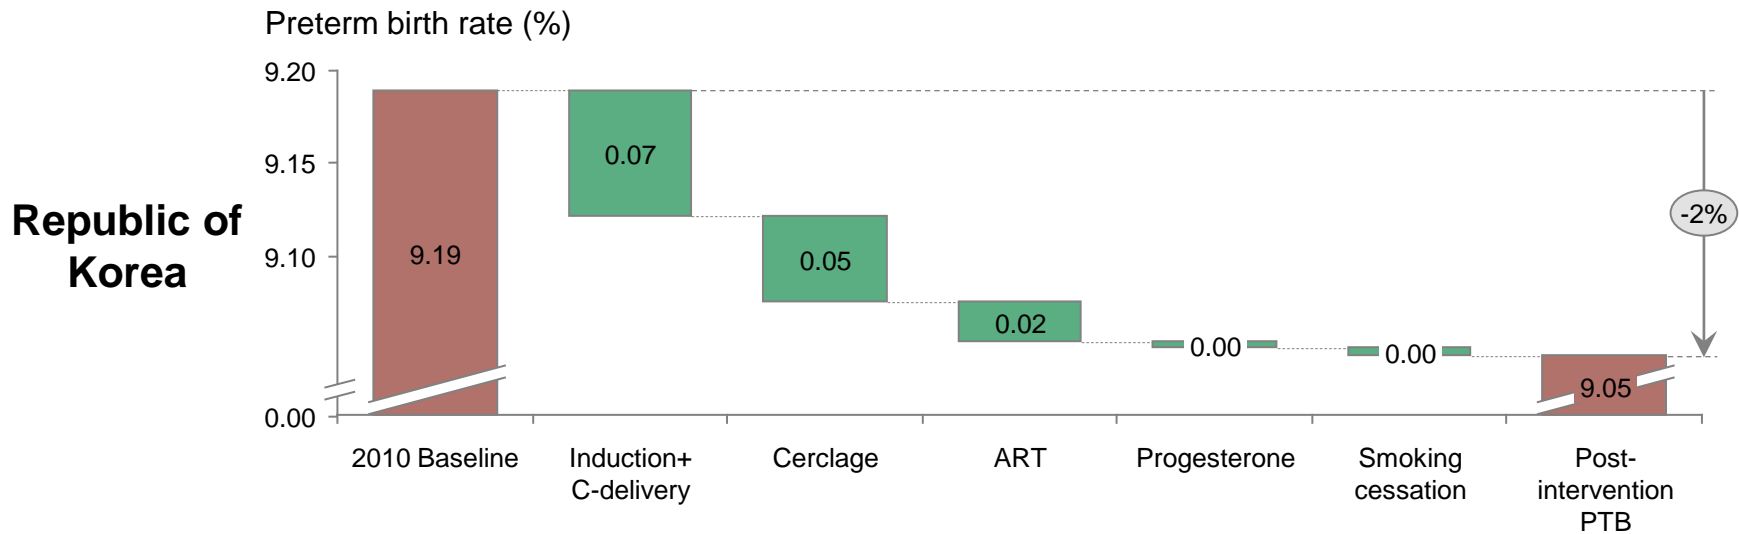



Webtable 27. Estimated reduction in preterm birth for 5 selected preventive interventions for 39 VHDI countries

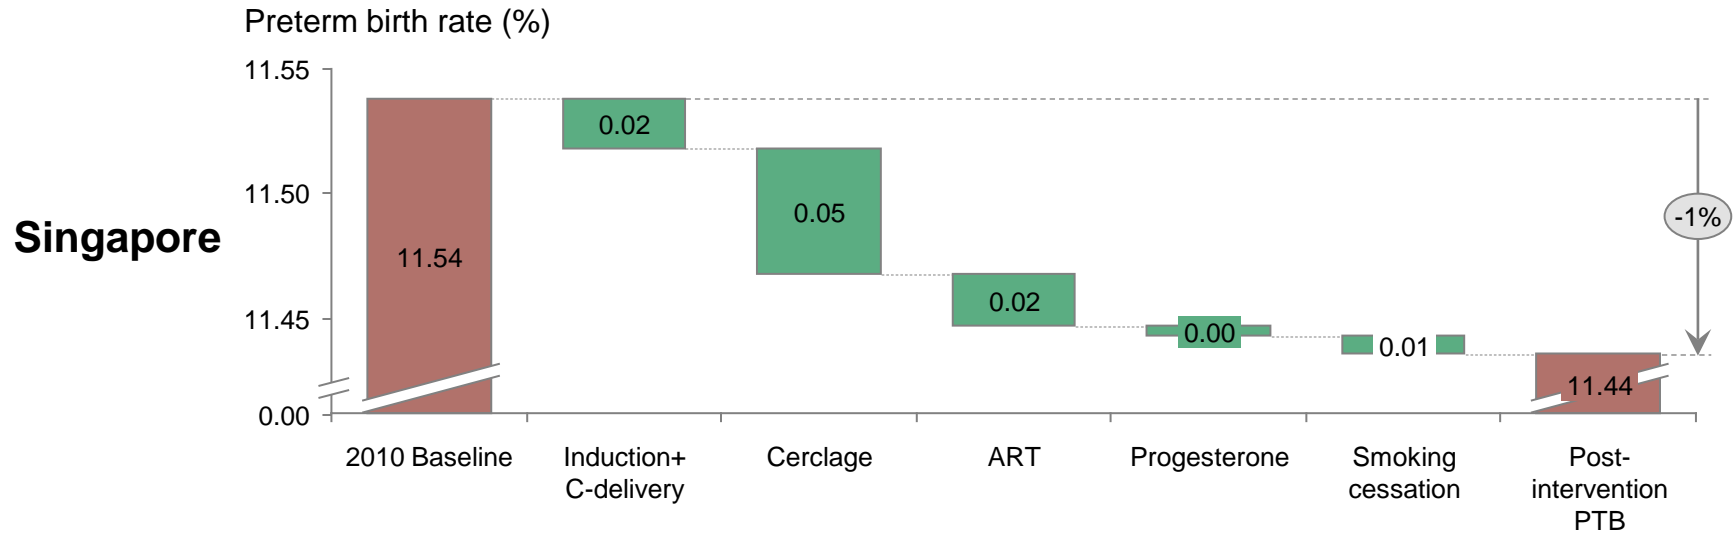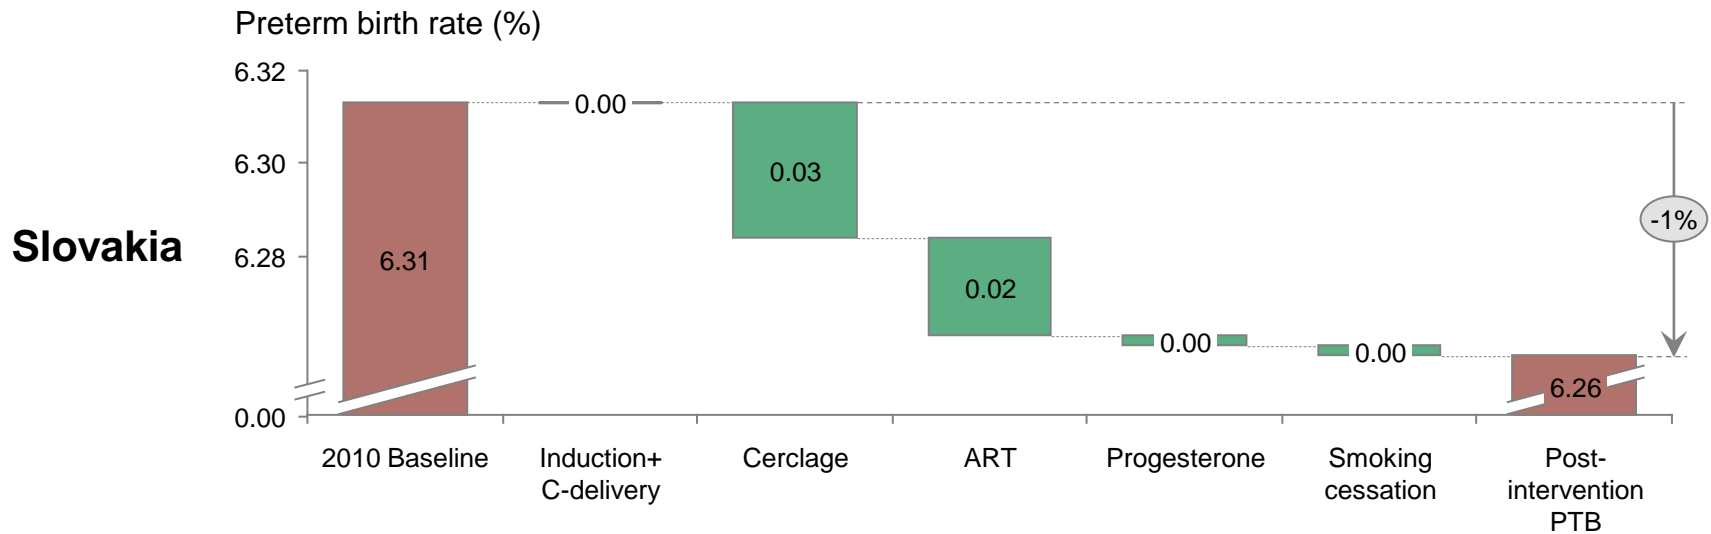

Webtable 27. Estimated reduction in preterm birth for 5 selected preventive interventions for 39 VHDI countries

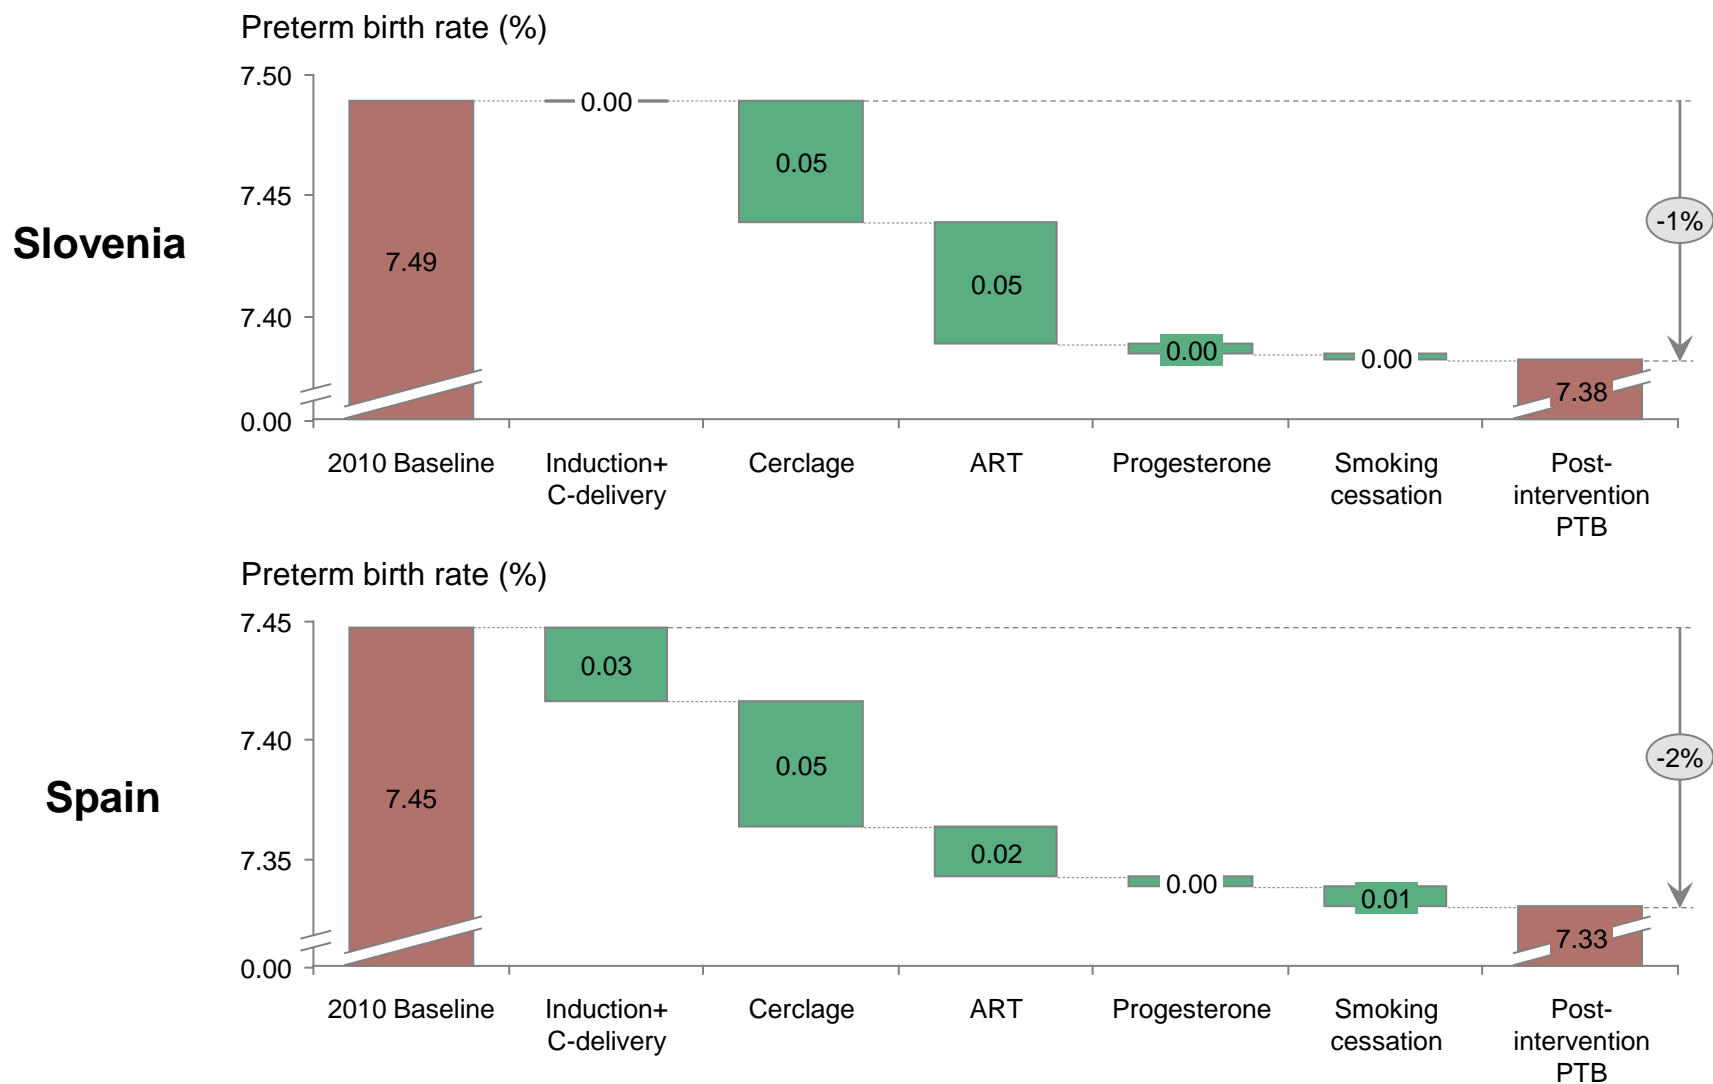

Webtable 27. Estimated reduction in preterm birth for 5 selected preventive interventions for 39 VHDI countries

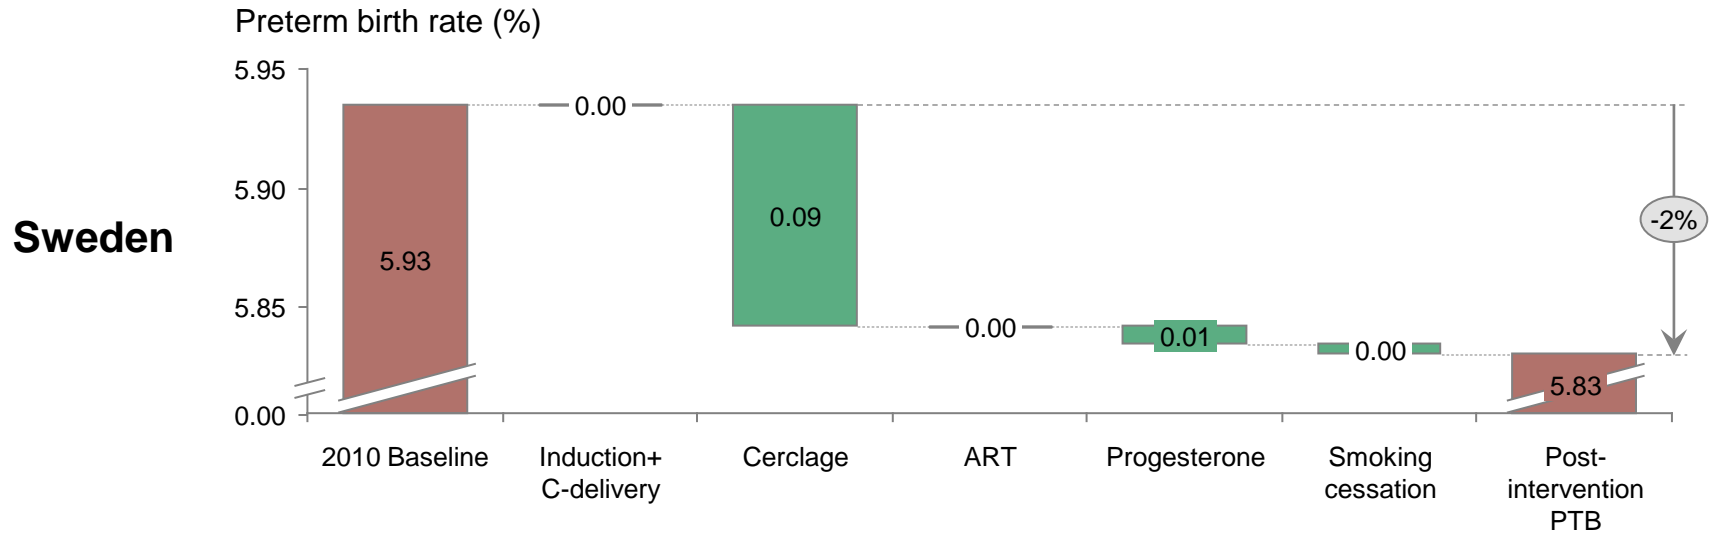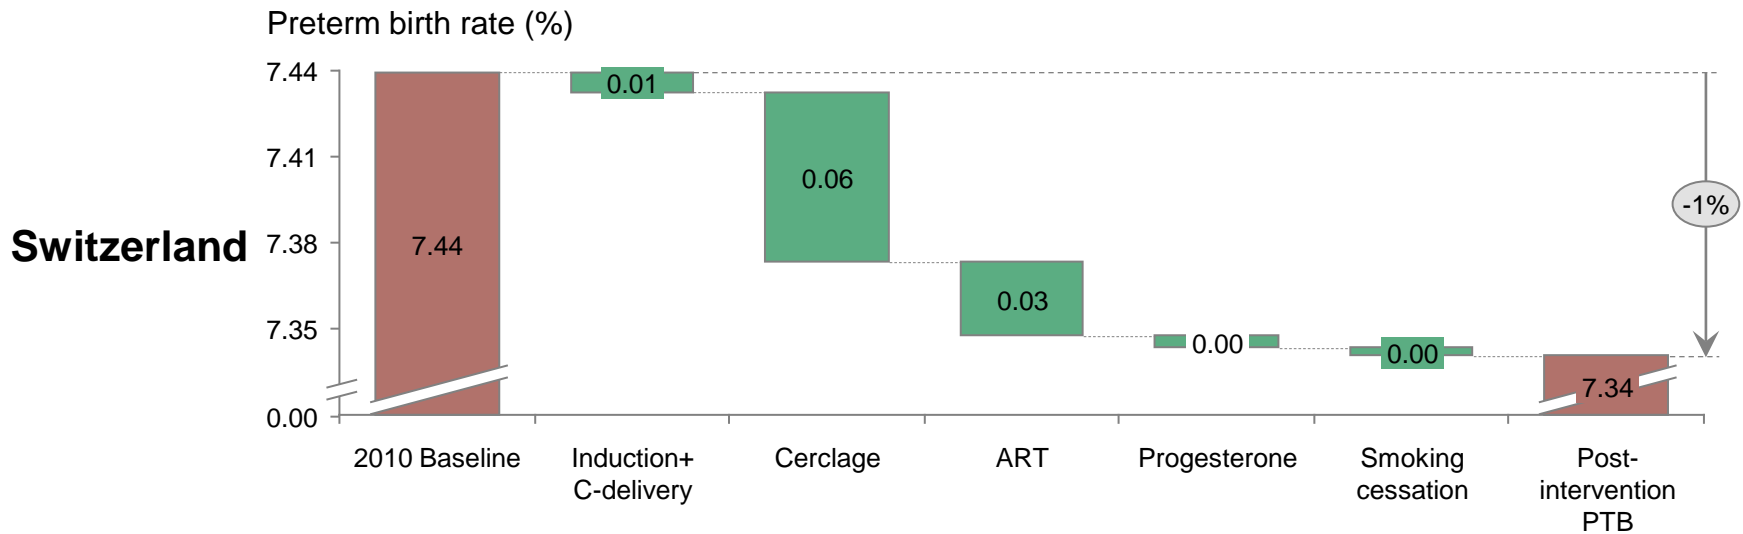

Webtable 27. Estimated reduction in preterm birth for 5 selected preventive interventions for 39 VHDI countries

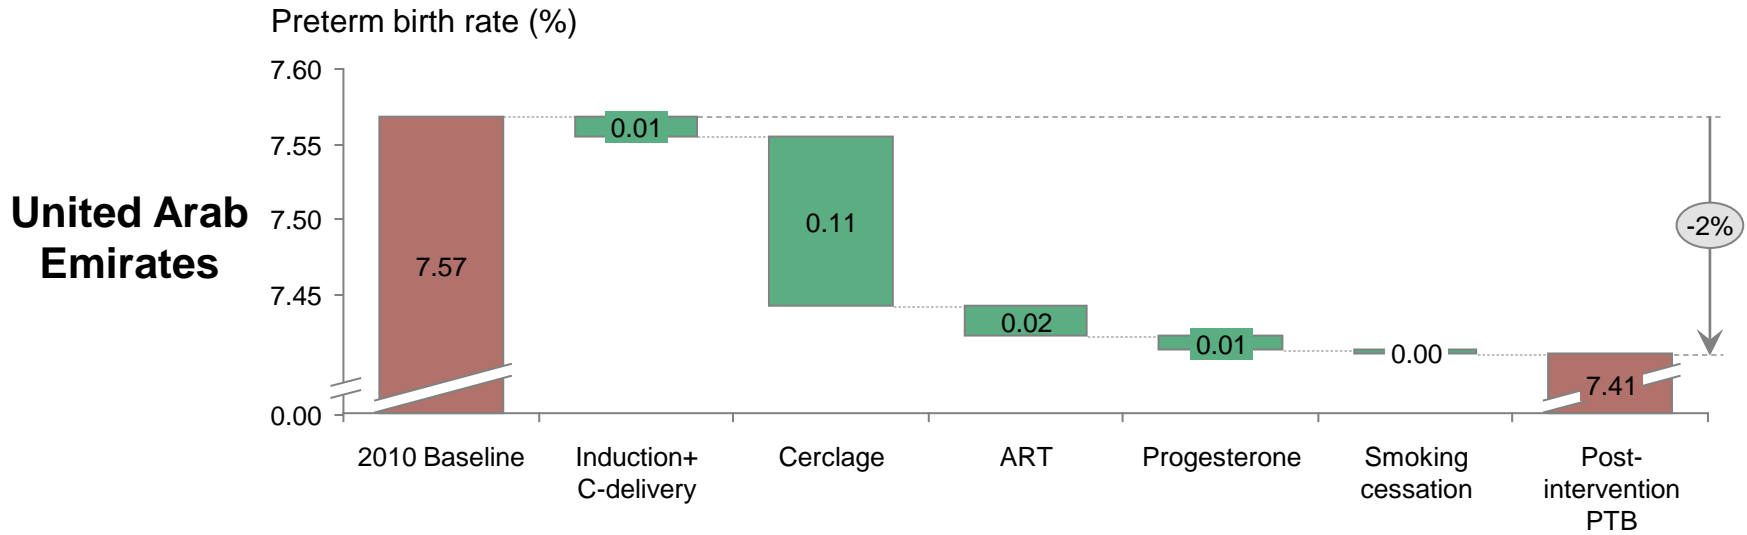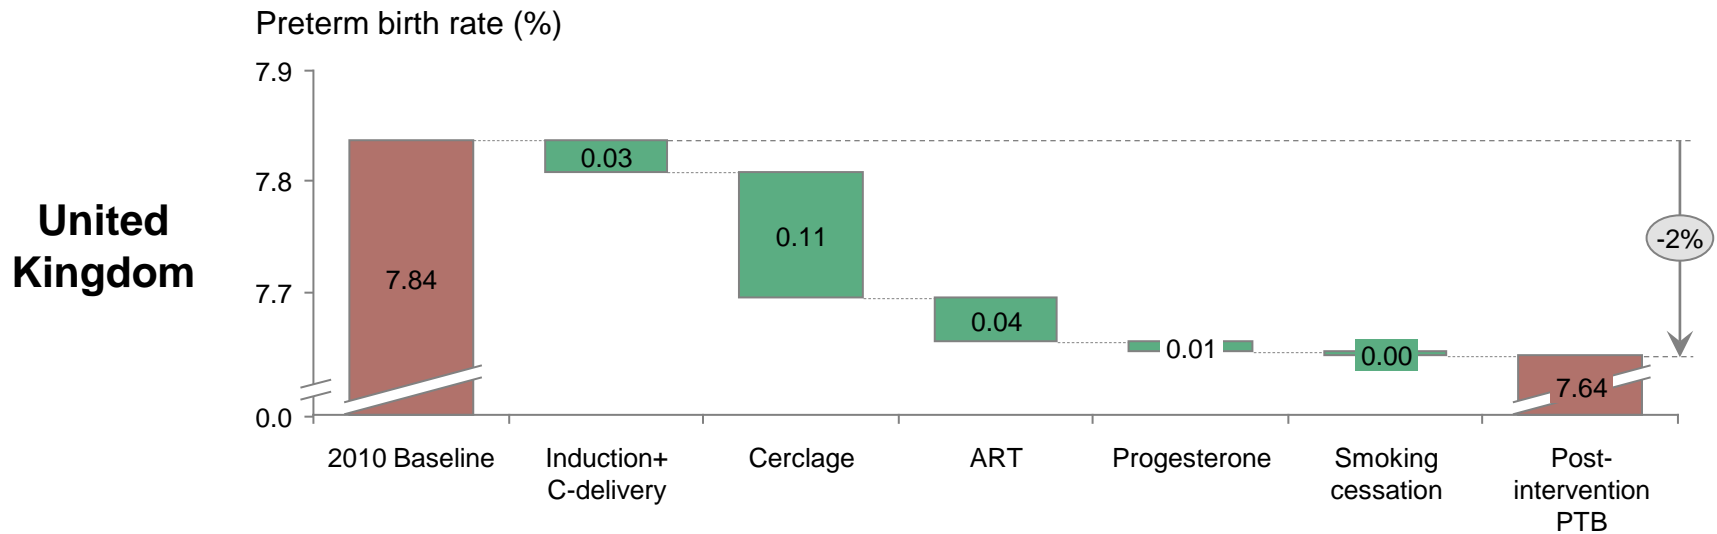

Webtable 27. Estimated reduction in preterm birth for 5 selected preventive interventions for 39 VHHDI countries

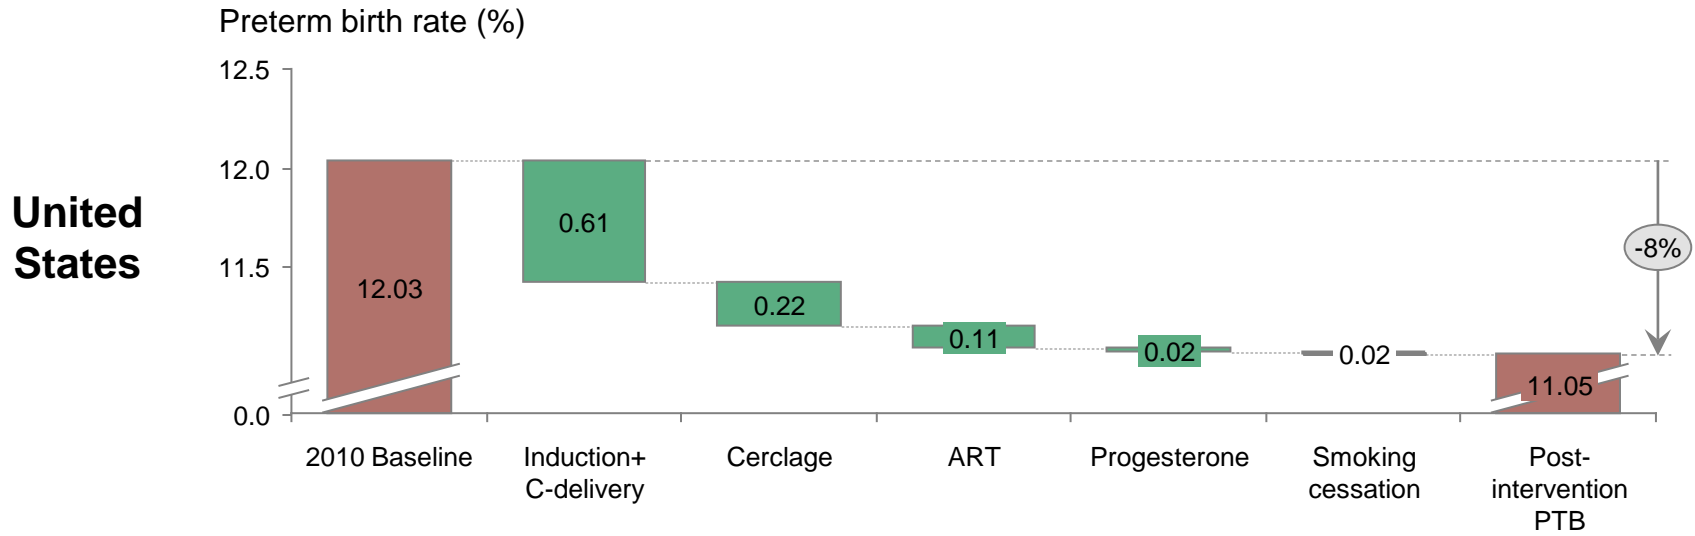

**Webtable 28. Country-specific purchasing power parity and exchange rate from 2005 used in economic cost savings analysis**

| <b>Country</b>       | <b>Purchasing power parity (2005)</b> | <b>Exchange rate (2005)</b> |
|----------------------|---------------------------------------|-----------------------------|
| Argentina            | 1.269395503                           | 2.9036575                   |
| Australia            | 1.388355787                           | 1.309473333                 |
| Austria              | 0.886404376                           | 0.80412                     |
| Bahrain              | 0.248763473                           | 0.376                       |
| Belgium              | 0.899600072                           | 0.80412                     |
| Canada               | 1.213644034                           | 1.211763333                 |
| Chile                | 333.69                                | 559.7675                    |
| Croatia              | 3.915327306                           | 5.949236917                 |
| Cyprus               | 0.727831073                           | 0.464070507                 |
| Czech Republic       | 14.31623626                           | 23.95741667                 |
| Denmark              | 8.590082555                           | 5.99691                     |
| Estonia              | 7.854318853                           | 12.58378659                 |
| Finland              | 0.977232128                           | 0.80412                     |
| France               | 0.923333793                           | 0.80412                     |
| Germany              | 0.866875407                           | 0.80412                     |
| Greece               | 0.714036641                           | 0.80412                     |
| Hungary              | 128.5938234                           | 199.5825                    |
| Ireland              | 1.010233744                           | 0.80412                     |
| Israel               | 3.716937447                           | 4.4877                      |
| Italy                | 0.866646447                           | 0.80412                     |
| Japan                | 129.5519548                           | 110.2182117                 |
| Latvia               | 0.301971371                           | 0.564716667                 |
| Lithuania            | 1.486572911                           | 2.774025                    |
| Netherlands          | 0.896153709                           | 0.80412                     |
| New Zealand          | 1.535000493                           | 1.420273457                 |
| Norway               | 8.896433343                           | 6.4425                      |
| Poland               | 1.869116126                           | 3.235483333                 |
| Portugal             | 0.684330207                           | 0.80412                     |
| Qatar                | 2.745219967                           | 3.64                        |
| Republic of Korea    | 788.9201348                           | 1024.116667                 |
| Singapore            | 1.078562099                           | 1.6643975                   |
| Slovakia             | 0.565959701                           | 1.029618934                 |
| Slovenia             | 0.611602841                           | 0.804143716                 |
| Spain                | 0.764910563                           | 0.80412                     |
| Sweden               | 9.37836727                            | 7.473088333                 |
| Switzerland          | 1.742756069                           | 1.245176667                 |
| United Arab Emirates | 2.438167                              | 3.6725                      |
| United Kingdom       | 0.636173112                           | 0.549998333                 |
| United States        | 1                                     | 1                           |
